# Supplementary material for: Effectiveness of Covid-19 vaccines against SARS-CoV-2 Omicron variant (B.1.1.529): A systematic review with meta-analysis and meta-regression
Source: bioRxiv or medRxiv preprint supplement (doi:10.1101/2022.04.29.22274454), 2022-05-02

# SUPPLEMENTARY MATERIALS

## Contents

|                                                                                                                      |    |
|----------------------------------------------------------------------------------------------------------------------|----|
| S.1. Literature Search .....                                                                                         | 3  |
| The Keywords .....                                                                                                   | 3  |
| The Search Results .....                                                                                             | 3  |
| Table S1. Results of systematic searches. ....                                                                       | 3  |
| S.2. Assessment of Quality of Study .....                                                                            | 4  |
| Table S2. The assessment of quality of study for cohort studies using Newcastle-Ottawa Scale (NOS) .....             | 4  |
| Table S3. The assessment of quality of study for case-control studies using Newcastle-Ottawa Scale (NOS) .....       | 5  |
| S.3. Summary of outcomes for full dose.....                                                                          | 7  |
| Table S4. Summary of outcomes for full dose .....                                                                    | 7  |
| S.4. Summary of outcomes for booster dose .....                                                                      | 11 |
| Table S5. Summary of outcomes for booster dose .....                                                                 | 11 |
| S.5. Summary of outcomes for booster vs full dose of the within 3 months or more model .                             | 14 |
| Table S6. Summary of outcomes for booster vs full dose of the within 3 months or more model .....                    | 14 |
| S.6. Summary of outcomes for booster vs full dose of the within 3 months model.....                                  | 16 |
| Table S7. Summary of outcomes for booster vs full dose of the within 3 months model ..                               | 16 |
| S.8. Detailed Results of VE Estimates and VE Reduction of Full Dose .....                                            | 18 |
| Table S9. Detailed results of VE estimates and VE reduction of full dose for any infection outcome .....             | 18 |
| Table S10. Detailed results of VE estimates and VE reduction of full dose for severe infection outcome .....         | 28 |
| Table S11. Detailed results of VE estimates and VE reduction of full dose for symptomatic infection outcome .....    | 34 |
| S.9. Detailed Results of VE Estimates and VE Reduction of Booster Dose.....                                          | 43 |
| Table S12. Detailed results of VE estimates and VE reduction of booster dose for any infection outcome .....         | 43 |
| Table S13. Detailed results of VE estimates and VE reduction of booster dose for severe infection outcome .....      | 51 |
| Table S14. Detailed results of VE estimates and VE reduction of booster dose for symptomatic infection outcome ..... | 56 |
| S.10. Detailed Results of Meta-analyses for the 'Within 3 Months' Model .....                                        | 63 |
| Table S15. Detailed Results of meta-analyses for within 3 months model .....                                         | 63 |

|                                                                                                                                             |    |
|---------------------------------------------------------------------------------------------------------------------------------------------|----|
| S.11. Detailed Results of Meta-analyses for the ‘Within 3 Months or More’ Model .....                                                       | 65 |
| Table S16. Detailed Results of meta-analyses for within 3 months or more model .....                                                        | 65 |
| S.12. Sensitivity Analyses for the ‘Within 3 Months’ Model.....                                                                             | 67 |
| Figure S1. The result of leave-one-out sensitivity analyses for any infection endpoint in the ‘within 3 months’ model .....                 | 67 |
| Figure S2. The result of leave-one-out sensitivity analyses for severe infection endpoint in the ‘within 3 months’ model .....              | 68 |
| Figure S3. The result of leave-one-out sensitivity analyses for symptomatic infection endpoint in the ‘within 3 months’ model .....         | 69 |
| S.13. Sensitivity Analyses for the ‘Within 3 Months or More’ Model.....                                                                     | 70 |
| Figure S4. The result of leave-one-out sensitivity analyses for any infection endpoint in the ‘within 3 months or more’ model .....         | 70 |
| Figure S5. The result of leave-one-out sensitivity analyses for severe infection endpoint in the ‘within 3 months or more’ model .....      | 71 |
| Figure S6. The result of leave-one-out sensitivity analyses for symptomatic infection endpoint in the ‘within 3 months or more’ model ..... | 72 |

## S.1. Literature Search

### The Keywords

#1 (SARS-CoV-2) OR (COVID-19)

#2 (Omicron) OR (B.1.1.529)

#3 (Vaccine) OR (Vaccination)

#4 (Vaccine efficacy) OR (Vaccine effectiveness)

### The Search Results

Table S1. Results of systematic searches.

| <b>Database</b>      | <b>Keywords</b>         | <b>Search Result</b> | <b>Search-time</b>           |
|----------------------|-------------------------|----------------------|------------------------------|
| PubMed               | #1 AND #2 AND #3 AND #4 | 121                  | April 6 <sup>th</sup> , 2022 |
| ScienceDirect        | #1 AND #2 AND #3 AND #4 | 475                  | April 6 <sup>th</sup> , 2022 |
| CENTRAL              | #1 AND #2 AND #3 AND #4 | 2                    | April 6 <sup>th</sup> , 2022 |
| Web of Science       | #1 AND #2 AND #3 AND #4 | 61                   | April 6 <sup>th</sup> , 2022 |
| Scopus               | #1 AND #2 AND #3 AND #4 | 619                  | April 6 <sup>th</sup> , 2022 |
| medRxiv              | #1 AND #2 AND #3 AND #4 | 455                  | April 6 <sup>th</sup> , 2022 |
| bioRxiv              | #1 AND #2 AND #3 AND #4 | 312                  | April 6 <sup>th</sup> , 2022 |
| Bibliographic search | -                       | 19                   | April 6 <sup>th</sup> , 2022 |

## S.2. Assessment of Quality of Study

Table S2. The assessment of quality of study for cohort studies using Newcastle-Ottawa Scale (NOS)

| <b>NOS of Cohort Study</b>                                                   |                         |                             |                         |                       |                          |
|------------------------------------------------------------------------------|-------------------------|-----------------------------|-------------------------|-----------------------|--------------------------|
| <b>Components</b>                                                            | Hansen et al.<br>(2021) | Abu-Raddad et al.<br>(2022) | Monge et al.,<br>(2022) | Šmíd et al.<br>(2022) | Fowlkes et al.<br>(2022) |
| <b>Selection</b>                                                             |                         |                             |                         |                       |                          |
| Representativeness of the exposed cohort                                     | *                       | *                           | *                       | *                     | *                        |
| Selection of the non-exposed cohort                                          | *                       | *                           | *                       | *                     | *                        |
| Ascertainment of exposure                                                    | *                       | *                           | *                       | *                     | *                        |
| Demonstration that outcome of interest was not present at start of the study | *                       | *                           | -                       | -                     | -                        |
| <b>Comparability</b>                                                         |                         |                             |                         |                       |                          |
| Comparability of cohorts on the basis of design or analysis                  | *                       | **                          | *                       | *                     | *                        |
| <b>Exposure</b>                                                              |                         |                             |                         |                       |                          |
| Assessment of outcome                                                        | *                       | *                           | *                       | *                     | *                        |
| Enough follow-up time length for outcome to occur                            | *                       | *                           | *                       | *                     | *                        |
| Adequacy of follow-up of cohorts                                             | *                       | *                           | *                       | *                     | *                        |
| <b>Study Quality</b>                                                         |                         |                             |                         |                       |                          |
| <b>Total Score</b>                                                           | 8                       | 9                           | 7                       | 7                     | 7                        |
| <b>Interpretation</b>                                                        | Good                    | Good                        | Good                    | Good                  | Good                     |

Table S3. The assessment of quality of study for case-control studies using Newcastle-Ottawa Scale (NOS)

| NOS of Case-Control Study |                                  |                                 |                       |                        |                                                                            |                           |                                                     |                   |               |                |
|---------------------------|----------------------------------|---------------------------------|-----------------------|------------------------|----------------------------------------------------------------------------|---------------------------|-----------------------------------------------------|-------------------|---------------|----------------|
| Components                | Selection                        |                                 |                       | Comparability          |                                                                            | Exposure                  |                                                     |                   | Study Quality |                |
|                           | Is the case definition adequate? | Representativeness of the cases | Selection of controls | Definition of controls | Comparability of cases and controls on the basis of the design or analysis | Ascertainment of exposure | Same method of ascertainment for cases and controls | Non-response rate | Total Score   | Interpretation |
| Buchan et al. (2021)      | *                                | *                               | *                     | *                      | *                                                                          | -                         | *                                                   | *                 | 7             | Good           |
| Gray et al. (2021)        | *                                | *                               | *                     | *                      | *                                                                          | *                         | *                                                   | *                 | 8             | Good           |
| Accorsi et al. (2022)     | *                                | *                               | *                     | *                      | *                                                                          | -                         | *                                                   | *                 | 7             | Good           |
| Andrews et al. (2022)     | *                                | *                               | *                     | *                      | *                                                                          | *                         | *                                                   | *                 | 8             | Good           |
| Chemaitelly et al. (2022) | *                                | *                               | *                     | *                      | *                                                                          | *                         | *                                                   | *                 | 8             | Good           |
| Collie et al. (2022)      | *                                | *                               | *                     | *                      | *                                                                          | *                         | *                                                   | *                 | 8             | Good           |
| Ferdinand et al. (2022)   | *                                | *                               | *                     | *                      | *                                                                          | *                         | *                                                   | *                 | 8             | Good           |
| Klein et al. (2022)       | *                                | *                               | *                     | *                      | *                                                                          | *                         | *                                                   | *                 | 8             | Good           |
| Lauring et al. (2022)     | *                                | *                               | *                     | *                      | **                                                                         | *                         | *                                                   | *                 | 9             | Good           |
| Natarajan et al. (2022)   | *                                | *                               | *                     | *                      | **                                                                         | *                         | *                                                   | *                 | 9             | Good           |
| Tartof et al. (2022)      | *                                | *                               | *                     | *                      | *                                                                          | *                         | *                                                   | *                 | 8             | Good           |
| Tenforde et al. (2022)    | *                                | *                               | *                     | *                      | *                                                                          | -                         | *                                                   | *                 | 7             | Good           |

|                        |   |   |   |   |    |   |   |   |   |      |
|------------------------|---|---|---|---|----|---|---|---|---|------|
| Thompson et al. (2022) | * | * | * | * | *  | * | * | * | 8 | Good |
| Tseng et al. (2022)    | * | * | * | * | ** | * | * | * | 9 | Good |
| Young-Xu et al. (2022) | * | * | * | * | *  | * | * | * | 8 | Good |
| Zambrano et al. (2022) | * | * | * | * | *  | * | * | * | 8 | Good |

### S.3. Summary of outcomes for full dose

Table S4. Summary of outcomes for full dose

| Study                  | Endpoints                               | Vaccine         | Study Design | Days Latitude | Follow-up Interval | SE     | VE (95%CI)        |
|------------------------|-----------------------------------------|-----------------|--------------|---------------|--------------------|--------|-------------------|
| Ferdinand et al., 2022 | Severe infection                        | Mixture of mRNA | Case-control | 60            | 0 to 2 months      | 8.163  | 71% (51% to 83%)  |
|                        |                                         | Mixture of mRNA | Case-control | 180           | 2 to 3 months      | 5.357  | 65% (53% to 74%)  |
|                        |                                         | Mixture of mRNA | Case-control | 240           | 3 to 4 months      | 8.418  | 58% (38% to 71%)  |
|                        |                                         | Mixture of mRNA | Case-control | 300           | 5+ months          | 2.806  | 54% (48% to 59%)  |
|                        | Symptomatic Infection                   | Mixture of mRNA | Case-control | 60            | 0 to 2 months      | 3.316  | 69% (62% to 75%)  |
|                        |                                         | Mixture of mRNA | Case-control | 180           | 2 to 3 months      | 2.551  | 50% (45% to 55%)  |
|                        |                                         | Mixture of mRNA | Case-control | 240           | 3 to 4 months      | 3.316  | 48% (41% to 54%)  |
|                        |                                         | Mixture of mRNA | Case-control | 300           | 5+ months          | 1.531  | 37% (34% to 40%)  |
| Klein et al., 2022     | Symptomatic infection (Age 16-17 years) | BNT162b2        | Case-control | 149           | 14 to 149 days     | 11.480 | 34% (8% to 53%)   |
|                        |                                         | BNT162b2        | Case-control | 299           | 150+ days          | 12.245 | -3% (-30% to 18%) |
|                        |                                         | BNT162b2        | Case-control | 149           | 14 to 149 days     | 6.888  | 45% (30% to 57%)  |
|                        |                                         | BNT162b2        | Case-control | 299           | 150+ days          | 10.714 | -2% (-25% to 17%) |
|                        |                                         | BNT162b2        | Case-control | 67            | 14 to 67 days      | 8.929  | 51% (30% to 65%)  |
| Natarajan et al., 2022 | Severe infection                        | AD26.COVS2S     | Case-control | 120           | 7 to 120 days      | 6.378  | 67% (52% to 77%)  |
|                        |                                         | Mixture of mRNA | Case-control | 120           | 7 to 120 days      | 3.571  | 78% (70% to 84%)  |
|                        | Symptomatic Infection                   | AD26.COVS2S     | Case-control | 120           | 7 to 120 days      | 5.102  | 54% (43% to 63%)  |
|                        |                                         | Mixture of mRNA | Case-control | 120           | 7 to 120 days      | 2.041  | 79% (74% to 82%)  |
| Tenforde et al., 2022  | Severe infection                        | Mixture of mRNA | Case-control | 256           | 256 days (median)  | 5.357  | 79% (66% to 87%)  |
| Zambrano et al., 2022  | Severe Infection                        | BNT162b2        | Case-control | 63            | 63 days (median)   | 5.357  | 90% (75% to 96%)  |
| Accorsi et al., 2022*  | Symptomatic Infection                   | BNT162b2        | Case-control | 240           | 14+ days           | 2.653  | 0% (-5% to 5%)    |
|                        |                                         | mRNA-1273       | Case-control | 240           | 14+ days           | 2.679  | 13% (7% to 18%)   |
| Andrews et al., 2022   | Symptomatic Infection                   | ChAdOx1 nCov-19 | Case-control | 28            | 2 to 4 weeks       | 4.566  | 49% (39% to 57%)  |

|                     |                          |                    |              |     |                 |        |                    |
|---------------------|--------------------------|--------------------|--------------|-----|-----------------|--------|--------------------|
|                     |                          | ChAdOx1<br>nCov-19 | Case-control | 70  | 5 to 9 weeks    | 4.209  | 34% (25% to 42%)   |
|                     |                          | ChAdOx1<br>nCov-19 | Case-control | 105 | 10 to 14 weeks  | 3.750  | 29% (21% to 36%)   |
|                     |                          | ChAdOx1<br>nCov-19 | Case-control | 140 | 15 to 19 weeks  | 2.168  | 18% (13% to 22%)   |
|                     |                          | ChAdOx1<br>nCov-19 | Case-control | 175 | 20 to 24 weeks  | 1.071  | 4% (2% to 6%)      |
|                     |                          | ChAdOx1<br>nCov-19 | Case-control | 210 | 25+ weeks       | 0.765  | -3% (-4% to -1%)   |
|                     |                          | BNT162b2           | Case-control | 28  | 2 to 4 weeks    | 0.791  | 66% (64% to 67%)   |
|                     |                          | BNT162b2           | Case-control | 70  | 5 to 9 weeks    | 0.791  | 49% (47% to 50%)   |
|                     |                          | BNT162b2           | Case-control | 105 | 10 to 14 weeks  | 0.714  | 30% (29% to 32%)   |
|                     |                          | BNT162b2           | Case-control | 140 | 15 to 19 weeks  | 0.612  | 15% (14% to 17%)   |
|                     |                          | BNT162b2           | Case-control | 175 | 20 to 24 weeks  | 0.714  | 12% (10% to 13%)   |
|                     |                          | BNT162b2           | Case-control | 210 | 25+ weeks       | 0.893  | 9% (7% to 11%)     |
|                     |                          | mRNA-1273          | Case-control | 28  | 2 to 4 weeks    | 2.015  | 75% (71% to 79%)   |
|                     |                          | mRNA-1273          | Case-control | 70  | 5 to 9 weeks    | 2.270  | 53% (48% to 57%)   |
|                     |                          | mRNA-1273          | Case-control | 105 | 10 to 14 weeks  | 1.454  | 36% (33% to 38%)   |
|                     |                          | mRNA-1273          | Case-control | 140 | 15 to 19 weeks  | 1.071  | 25% (23% to 27%)   |
|                     |                          | mRNA-1273          | Case-control | 175 | 20 to 24 weeks  | 1.684  | 15% (12% to 18%)   |
|                     |                          | mRNA-1273          | Case-control | 210 | 25+ weeks       | 5.306  | 15% (4% to 25%)    |
| Buchan et al., 2021 | Symptomatic<br>Infection | Mixture of mRNA    | Case-control | 59  | 7 to 59 days    | 5.357  | 36% (24% to 45%)   |
|                     |                          | Mixture of mRNA    | Case-control | 119 | 60 to 119 days  | 4.592  | 12% (3% to 21%)    |
|                     |                          | Mixture of mRNA    | Case-control | 179 | 120 to 179 days | 3.571  | 15% (8% to 22%)    |
|                     |                          | Mixture of mRNA    | Case-control | 239 | 180 to 239 days | 4.592  | 1% (-8% to 10%)    |
|                     |                          | Mixture of mRNA    | Case-control | 299 | 240+ days       | 8.673  | 2% (-17% to 17%)   |
|                     |                          | Mixture of mRNA    | Case-control | 59  | 7 to 59 days    | 50.000 | 55% (-106% to 90%) |
|                     |                          | Mixture of mRNA    | Case-control | 119 | 60 to 119 days  | 37.755 | 37% (-71% to 77%)  |
|                     |                          | Mixture of mRNA    | Case-control | 179 | 120 to 179 days | 9.184  | 75% (51% to 87%)   |
|                     |                          | Mixture of mRNA    | Case-control | 239 | 180 to 239 days | 7.398  | 82% (62% to 91%)   |



|                          |                       |                 |              |               |                   |                  |                     |
|--------------------------|-----------------------|-----------------|--------------|---------------|-------------------|------------------|---------------------|
|                          |                       | Mixture of mRNA | Case-control | 299           | 240+ days         | 28.061           | 86% (-12% to 98%)   |
| Chemaitelly et al., 2022 | Symptomatic Infection | BNT162b2        | Case-control | 30            | 0 to 1 month      | 5.408            | 62% (50% to 71%)    |
|                          |                       | BNT162b2        | Case-control | 60            | 1 to 2 months     | 5.612            | 46% (34% to 56%)    |
|                          |                       | BNT162b2        | Case-control | 90            | 2 to 3 months     | 5.281            | 36% (25% to 46%)    |
|                          |                       | BNT162b2        | Case-control | 120           | 3 to 4 months     | 5.051            | 29% (18% to 38%)    |
|                          |                       | BNT162b2        | Case-control | 150           | 4 to 5 months     | 6.173            | 11% (-2% to 22%)    |
|                          |                       | BNT162b2        | Case-control | 180           | 5 to 6 months     | 3.980            | 14% (6% to 22%)     |
|                          |                       | BNT162b2        | Case-control | 210           | 6 to 7 months     | 3.546            | 10% (2% to 16%)     |
|                          |                       | BNT162b2        | Case-control | 240           | 7 to 8 months     | 3.852            | -8% (-15% to 0%)    |
|                          |                       | BNT162b2        | Case-control | 270           | 8 to 9 months     | 3.801            | 2% (-6% to 9%)      |
|                          |                       | BNT162b2        | Case-control | 300           | 9 to 10 months    | 3.903            | -18% (-26% to -10%) |
|                          |                       | BNT162b2        | Case-control | 330           | 10 to 11 months   | 4.796            | 0% (-10% to 9%)     |
|                          |                       | BNT162b2        | Case-control | 360           | 11+ months        | 6.378            | 17% (3% to 28%)     |
|                          |                       | mRNA-1273       | Case-control | 120           | 1 to 3 months     | 12.194           | 45% (16% to 64%)    |
|                          |                       | mRNA-1273       | Case-control | 180           | 4 to 6 months     | 3.495            | 21% (14% to 27%)    |
| mRNA-1273                | Case-control          | 240             | 7+ months    | 3.444         | -9% (-16% to -3%) |                  |                     |
| Collie et al., 2022      | Severe Infection      | BNT162b2        | Case-control | NR            | 14+ days          | 6.888            | 50% (35% to 62%)    |
|                          | Symptomatic Infection | BNT162b2        | Case-control | NR            | 0+ days           | 4.847            | 70% (59% to 78%)    |
| Lauring et al., 2022     | Severe Infection      | Mixture of mRNA | Case-control | NR            | 7+ days           | 7.143            | 66% (49% to 77%)    |
| Tartof et al., 2022      |                       | BNT162b2        | Case-control | 90            | 0 to 3 months     | 10.969           | 70% (41% to 84%)    |
|                          |                       | BNT162b2        | Case-control | 180           | 3 to 6 months     | 9.184            | 67% (44% to 80%)    |
|                          |                       | BNT162b2        | Case-control | 270           | 6+ months         | 5.102            | 68% (56% to 76%)    |
| Symptomatic Infection    | BNT162b2              | Case-control    | 90           | 0 to 3 months | 7.398             | 60% (43% to 72%) |                     |
|                          | BNT162b2              | Case-control    | 180          | 3 to 6 months | 7.653             | 38% (21% to 51%) |                     |
|                          | BNT162b2              | Case-control    | 270          | 6+ months     | 4.592             | 41% (32% to 50%) |                     |
| Thompson et al., 2022    | Positive Covid-19     | Mixture of mRNA | Case-control | 180           | 0 to 180 days     | 3.061            | 52% (46% to 58%)    |
|                          |                       | Mixture of mRNA | Case-control | 360           | 180+ days         | 2.806            | 38% (32% to 43%)    |
|                          |                       | Mixture of mRNA | Case-control | 179           | 0 to 179 days     | 6.378            | 81% (65% to 90%)    |

|                      |                   |                 |              |     |                 |        |                     |
|----------------------|-------------------|-----------------|--------------|-----|-----------------|--------|---------------------|
|                      | Severe Infection  | Mixture of mRNA | Case-control | 359 | 180+ days       | 7.908  | 57% (39% to 70%)    |
| Tseng et al., 2022   | Positive Covid-19 | mRNA-1273       | Case-control | 90  | 14 to 90 days   | 4.209  | 44% (35% to 52%)    |
|                      |                   | mRNA-1273       | Case-control | 180 | 91 to 180 days  | 3.469  | 24% (16% to 30%)    |
|                      |                   | mRNA-1273       | Case-control | 270 | 181 to 270 days | 1.811  | 14% (10% to 17%)    |
|                      |                   | mRNA-1273       | Case-control | 360 | 270+ days       | 2.704  | 6% (0% to 11%)      |
|                      | Severe Infection  | mRNA-1273       | Case-control | NR  | 14+ days        | 18.852 | 85% (23% to 97%)    |
| Yong-Xu, 2022        | Positive Covid-19 | Mixture of mRNA | Case-control | NR  | NR              | 2.551  | 25% (20% to 30%)    |
| Fowlkes et al., 2022 | Positive Covid-19 | BNT162b2        | Cohort       | 82  | 14 to 82 days   | 9.949  | 31% (9% to 48%)     |
|                      |                   | BNT162b2        | Cohort       | 149 | 14 to 149 days  | 14.541 | 59% (22% to 79%)    |
|                      |                   | BNT162b2        | Cohort       | 299 | 150+ days       | 29.847 | 62% (-28% to 89%)   |
| Hansen et al., 2021  | Positive Covid-19 | BNT162b2        | Cohort       | 30  | 27 to 28 days   | 12.806 | 55% (24% to 74%)    |
|                      |                   | BNT162b2        | Cohort       | 60  | 31 to 60 days   | 15.944 | 16% (-21% to 42%)   |
|                      |                   | BNT162b2        | Cohort       | 90  | 61 to 90 days   | 9.209  | 10% (-10% to 26%)   |
|                      |                   | BNT162b2        | Cohort       | 150 | 91 to 150 days  | 9.133  | -77% (-95% to -60%) |
|                      |                   | mRNA-1273       | Cohort       | 30  | 1 to 30 days    | 37.321 | 37% (-70% to 76%)   |
|                      |                   | mRNA-1273       | Cohort       | 60  | 31 to 60 days   | 27.219 | 30% (-41% to 65%)   |
|                      |                   | mRNA-1273       | Cohort       | 90  | 61 to 90 days   | 15.459 | 4% (-31% to 30%)    |
|                      |                   | mRNA-1273       | Cohort       | 150 | 91 to 150 days  | 10.612 | -39% (-62% to -20%) |
| Šmíd et al., 2022**  | Positive Covid-19 | Mixture         | Cohort       | 60  | 0 to 2 months   | 0.510  | 43% (42% to 44%)    |
|                      |                   | Mixture         | Cohort       | 120 | 2+ months       | 0.510  | 9% (8% to 10%)      |
|                      | Severe Infection  | Mixture         | Cohort       | 60  | 0 to 2 months   | 7.143  | 45% (29% to 57%)    |
|                      |                   | Mixture         | Cohort       | 120 | 2+ months       | 4.082  | 29% (21% to 37%)    |

\*Data of full dose in Accorsi et al., 2022 calculated from crude data of number of infected individuals

\*\*Smid et al., 2022 reports two full dose datasets, the one that exclude previous infection and with previous infection. We included the data that exclude previous infection for the analysis

\*Studies whose data of Days Latitude are only day 7 or below and NR are excluded from the meta-regression analysis.

## S.4. Summary of outcomes for booster dose

Table S5. Summary of outcomes for booster dose

| Authors                     | Endpoints                | Vaccine         | Design       | Days<br>Latitude | Follow-up Interval | SE of<br>VE | VE (95%CI)       |
|-----------------------------|--------------------------|-----------------|--------------|------------------|--------------------|-------------|------------------|
| Accorsi et al., 2022        | Symptomatic<br>Infection | BNT162b2        | Case-control | 30               | 7+ days            | 1.531       | 65% (62% to 68%) |
|                             |                          | mRNA-1273       | Case-control | 30               | 7+ days            | 1.276       | 72% (69% to 74%) |
| Andrews et al., 2022        | Symptomatic<br>Infection | BNT162b2        | Case-control | 7                | 1 week             | 0.383       | 67% (66% to 68%) |
|                             |                          | BNT162b2        | Case-control | 35               | 2 to 4 weeks       | 0.332       | 67% (67% to 68%) |
|                             |                          | BNT162b2        | Case-control | 70               | 5 to 9 weeks       | 0.408       | 55% (54% to 56%) |
|                             |                          | BNT162b2        | Case-control | 105              | 10+ week           | 5.867       | 46% (45% to 68%) |
|                             |                          | ChAdOx1 nCov-19 | Case-control | 7                | 1 week             | 8.597       | 58% (38% to 71%) |
|                             |                          | ChAdOx1 nCov-19 | Case-control | 35               | 2 to 4 weeks       | 5.230       | 56% (44% to 65%) |
|                             |                          | ChAdOx1 nCov-19 | Case-control | 70               | 5 to 9 weeks       | 5.714       | 47% (34% to 57%) |
|                             |                          | mRNA-1273       | Case-control | 7                | 1 week             | 1.301       | 64% (62% to 67%) |
|                             |                          | mRNA-1273       | Case-control | 35               | 2 to 4 weeks       | 1.276       | 65% (62% to 67%) |
| Buchan et al., 2021         | Severe<br>infection      | Mixture of mRNA | Case-control | 6                | 0 to 6 days        | 6.633       | 91% (71% to 97%) |
|                             |                          | Mixture of mRNA | Case-control | 14               | 7+ days            | 2.806       | 95% (87% to 98%) |
|                             | Symptomatic<br>Infection | Mixture of mRNA | Case-control | 6                | 0 to 6 days        | 3.571       | 36% (29% to 43%) |
|                             |                          | Mixture of mRNA | Case-control | 14               | 7+ days            | 2.296       | 61% (56% to 65%) |
| Chemaitelly et al.,<br>2022 | Symptomatic<br>Infection | BNT162b2        | Case-control | 7                | 1 week             | 7.015       | 16% (1% to 28%)  |
|                             |                          | BNT162b2        | Case-control | 21               | 2 to 3 weeks       | 6.097       | 53% (41% to 65%) |
|                             |                          | BNT162b2        | Case-control | 42               | 4 to 5 weeks       | 2.781       | 57% (51% to 62%) |
|                             |                          | BNT162b2        | Case-control | 63               | 6 to 7 weeks       | 3.138       | 46% (40% to 52%) |
|                             |                          | BNT162b2        | Case-control | 84               | 8 to 9 weeks       | 4.694       | 38% (28% to 47%) |
|                             |                          | BNT162b2        | Case-control | 105              | 10 to 11 weeks     | 5.051       | 44% (33% to 53%) |
|                             |                          | mRNA-1273       | Case-control | 7                | 1 week             | 15.332      | 4% (-31% to 29%) |

|                        |                                         |                 |              |           |                |                   |                   |
|------------------------|-----------------------------------------|-----------------|--------------|-----------|----------------|-------------------|-------------------|
|                        |                                         | mRNA-1273       | Case-control | 21        | 2 to 3 weeks   | 5.638             | 53% (41% to 63%)  |
|                        |                                         | mRNA-1273       | Case-control | 42        | 4 to 5 weeks   | 6.097             | 55% (41% to 65%)  |
|                        |                                         | mRNA-1273       | Case-control | 63        | 6+ weeks       | 8.597             | 39% (19% to 53%)  |
| Ferdinand et al., 2022 | Symptomatic Infection                   | Mixture of mRNA | Case-control | 60        | 0 to 2 months  | 0.765             | 87% (85% to 88%)  |
|                        |                                         | Mixture of mRNA | Case-control | 180       | 2 to 3 months  | 0.765             | 81% (79% to 82%)  |
|                        |                                         | Mixture of mRNA | Case-control | 240       | 3 to 4 months  | 3.061             | 66% (59% to 71%)  |
|                        |                                         | Mixture of mRNA | Case-control | 300       | 5+ months      | 30.102            | 31% (-50% to 68%) |
|                        | Severe infection                        | Mixture of mRNA | Case-control | 60        | 0 to 2 months  | 1.276             | 91% (88% to 93%)  |
|                        |                                         | Mixture of mRNA | Case-control | 180       | 2 to 3 months  | 1.276             | 88% (85% to 90%)  |
| Mixture of mRNA        |                                         | Case-control    | 240          | 4+ months | 4.592          | 78% (67% to 85%)  |                   |
| Gray et al., 2021      | Positive Covid-19                       | Ad26.CO2        | Case-control | 14        | 0 to 13 days   | 3.567             | 32% (25% to 39%)  |
|                        |                                         | Ad26.CO2        | Case-control | 28        | 14 to 27 days  | 3.674             | 14% (7% to 22%)   |
|                        |                                         | Ad26.CO2        | Case-control | 87        | 27 to 28 days  | 6.857             | 6% (-6% to 20%)   |
|                        | Severe Infection                        | Ad26.CO2        | Case-control | 13        | 0 to 13 days   | 13.265            | 93% (47% to 99%)  |
|                        |                                         | Ad26.CO2        | Case-control | 27        | 14 to 27 days  | 11.224            | 81% (49% to 93%)  |
| Klein et al., 2022     | Symptomatic Infection (Age 5-11 years)  | BNT162b2        | Case-control | 67        | 14 to 67 days  | 8.929             | 51% (30% to 65%)  |
|                        | Symptomatic Infection (Age 12-15 years) | BNT162b2        | Case-control | 149       | 14 to 149 days | 6.888             | 45% (30% to 57%)  |
|                        |                                         | BNT162b2        | Case-control | 299       | 150+ days      | 10.714            | -2% (-25% to 17%) |
|                        | Symptomatic infection (Age 16-17 years) | BNT162b2        | Case-control | 149       | 14 to 149 days | 11.480            | 34% (8% to 53%)   |
| BNT162b2               |                                         | Case-control    | 299          | 150+ days | 12.245         | -3% (-30% to 18%) |                   |
| Lauring et al., 2022   | Severe infection                        | Mixture of mRNA | Case-control | N/A       | 7+ days        | 4.337             | 86% (75% to 92%)  |
| Monge et al., 2022     | Positive Covid-19                       | Mixture         | Case-control | 34        | 7 to 34 days   | 0.561             | 51% (50% to 52%)  |
| Natarajan et al., 2022 | Symptomatic Infection                   | Mixture         | Case-control | 120       | 7 to 120 days  | 0.510             | 83% (82% to 84%)  |

|                       |                       |                 |              |     |                  |        |                   |
|-----------------------|-----------------------|-----------------|--------------|-----|------------------|--------|-------------------|
|                       | Severe infection      | Mixture         | Case-control | 120 | 7 to 120 days    | 0.765  | 90% (88% to 91%)  |
| Tartof et al., 2022   | Severe infection      | BNT162b2        | Case-control | 90  | 0 to 3 months    | 2.296  | 89% (83% to 92%)  |
|                       |                       | BNT162b2        | Case-control | 180 | 3 to 5 months    | 10.459 | 90% (57% to 98%)  |
|                       | Symptomatic Infection | BNT162b2        | Case-control | 90  | 6+ months        | 2.296  | 78% (73% to 82%)  |
|                       |                       | BNT162b2        | Case-control | 180 | 270+ days        | 14.286 | 48% (13% to 69%)  |
| Tenforde et al., 2022 | Severe infection      | Mixture of mRNA | Case-control | 60  | 60 days (median) | 2.296  | 94% (88% to 97%)  |
| Thompson et al., 2022 | Symptomatic Infection | Mixture of mRNA | Case-control | N/A | 14+ days         | 1.276  | 82% (79% to 84%)  |
|                       | Severe infection      | Mixture of mRNA | Case-control | N/A | 14+ days         | 3.571  | 90% (80% to 94%)  |
| Tseng et al., 2022    | Severe infection      | mRNA-1273       | Case-control | N/A | 14+ days         | 6.046  | 99% (76% to 100%) |
|                       | Positive Covid-19     | mRNA-1273       | Case-control | 60  | 14 to 60 days    | 0.944  | 72% (70% to 74%)  |
|                       |                       | mRNA-1273       | Case-control | 120 | 60+ days         | 3.342  | 51% (44% to 57%)  |
| Yong-Xu, 2022         | Severe infection      | Mixture of mRNA | Case-control | N/A | NR               | 2.296  | 91% (85% to 94%)  |
| Hansen et al., 2021   | Positive Covid-19     | BNT162b2        | Cohort       | 30  | 1 to 30 days     | 10.179 | 55% (31% to 70%)  |
| Šmíd et al., 2022     | Symptomatic Infection | Mixture         | Cohort       | 60  | 60 to 120 days   | 0.255  | 56% (55% to 56%)  |
|                       |                       | Mixture         | Cohort       | 120 | 120+ days        | 1.020  | 21% (19% to 23%)  |
|                       | Severe infection      | Mixture         | Cohort       | 60  | 60 to 120 days   | 5.357  | 87% (73% to 94%)  |
|                       |                       | Mixture         | Cohort       | 120 | 120+ days        | 2.041  | 79% (75% to 83%)  |

\*Studies whose data of Days Latitude are N/A or less than 7 days are excluded from the analysis.

## S.5. Summary of outcomes for booster vs full dose of the within 3 months or more model

Table S6. Summary of outcomes for booster vs full dose of the within 3 months or more model

| Authors                  | Outcomes              | Design       | Vaccine         | VED (95%CI)                | SE of VED |
|--------------------------|-----------------------|--------------|-----------------|----------------------------|-----------|
| Abu-Raddad et al., 2022  | Symptomatic Infection | Cohort       | BNT162b2        | 50.6% (50.18% to 51.02%)   | 0.213     |
| Abu-Raddad et al., 2022  | Symptomatic Infection | Cohort       | mRNA-1273       | 52.7% (51.53% to 53.87%)   | 0.597     |
| Abu-Raddad et al., 2022  | Severe infection      | Cohort       | BNT162b2        | 23.5% (20.57% to 26.43%)   | 1.497     |
| Accorsi et al., 2022     | Symptomatic Infection | Case-control | BNT162b2        | 64.9% (64.34% to 65.46%)   | 0.284     |
| Accorsi et al., 2022     | Symptomatic Infection | Case-control | mRNA-1273       | 59.5% (58.81% to 60.19%)   | 0.352     |
| Andrews et al., 2022     | Symptomatic Infection | Cohort       | ChAdOx1 nCov-19 | 27.29% (16.16% to 38.43%)  | 5.68      |
| Andrews et al., 2022     | Symptomatic Infection | Cohort       | BNT162b2        | 28.15% (26.5% to 29.79%)   | 0.841     |
| Andrews et al., 2022     | Symptomatic Infection | Cohort       | mRNA-1273       | 33.96% (28.34% to 39.59%)  | 2.869     |
| Buchan et al., 2021      | Symptomatic Infection | Case-control | mixture of mRNA | 35.85% (24.81% to 46.89%)  | 5.633     |
| Buchan et al., 2021      | Severe infection      | Case-control | mixture of mRNA | 24.21% (-33.37% to 81.79%) | 29.377    |
| Chemaitelly et al., 2022 | Symptomatic Infection | Case-control | mRNA-1273       | 6% (-14.52% to 26.51%)     | 10.466    |
| Chemaitelly et al., 2022 | Symptomatic Infection | Case-control | BNT162b2        | 9.01% (-23.82% to 41.83%)  | 16.748    |
| Ferdinand et al., 2022   | symptomatic Infection | Case-control | mixture of mRNA | 22.33% (16.9% to 27.77%)   | 2.774     |

|                        |                       |              |                 |                            |        |
|------------------------|-----------------------|--------------|-----------------|----------------------------|--------|
| Hansen et al., 2022    | Positive Covid-19     | Cohort       | BNT162b2        | 78.54% (53.26% to 103.81%) | 12.895 |
| Klein et al., 2022     | symptomatic Infection | Case-control | BNT162b2        | 41.7% (21.43% to 61.98%)   | 10.345 |
| Lauring et al., 2022   | Severe infection      | Case-control | mixture of mRNA | 2% (-4.88% to 8.88%)       | 3.512  |
| Natarajan et al., 2022 | Symptomatic Infection | Case-control | mixture of mRNA | 29% (26.41% to 31.59%)     | 1.321  |
| Natarajan et al., 2022 | Severe infection      | Case-control | mixture of mRNA | 17.5% (14.87% to 20.13%)   | 1.342  |
| Šmíd et al., 2022      | Severe infection      | Case-control | Mixture         | 46% (35.35% to 56.65%)     | 5.436  |
| Šmíd et al., 2022      | Positive Covid-19     | Case-control | Mixture         | 1.5% (-3.94% to 6.94%)     | 2.774  |
| Tartof et al., 2022    | Symptomatic Infection | Case-control | BNT162b2        | 33% (24.98% to 41.02%)     | 4.09   |
| Tartof et al., 2022    | Severe infection      | Case-control | BNT162b2        | 19% (-0.18% to 38.18%)     | 9.788  |
| Tenforde et al., 2022  | Severe infection      | Case-control | mixture of mRNA | 15% (12.88% to 17.12%)     | 1.082  |
| Thompson et al., 2022  | Severe infection      | Case-control | mixture of mRNA | 9% (-1.9% to 19.9%)        | 5.563  |
| Thompson et al., 2022  | Positive Covid-19     | Case-control | mixture of mRNA | 30% (25.07% to 34.93%)     | 2.516  |
| Tseng et al., 2022     | severe infection      | Case-control | mRNA-1273       | 14.7% (7.49% to 21.91%)    | 3.676  |
| Tseng et al., 2022     | Positive Covid-19     | Case-control | mRNA-1273       | 27.6% (20.4% to 34.8%)     | 3.674  |
| Yong-Xu et al., 2022   | Positive Covid-19     | Case-control | mixture of mRNA | 21% (20.14% to 21.86%)     | 0.437  |

## S.6. Summary of outcomes for booster vs full dose of the within 3 months model

Table S7. Summary of outcomes for booster vs full dose of the within 3 months model

| Authors                  | Outcomes              | Design       | Vaccine         | VED (95% CI)             | SE_diff |
|--------------------------|-----------------------|--------------|-----------------|--------------------------|---------|
| Andrews et al., 2022     | Symptomatic Infection | Cohort       | ChAdOx1 nCov-19 | 16.11% (2.41 to 29.82%)  | 6.99    |
| Andrews et al., 2022     | Symptomatic Infection | Cohort       | BNT162b2        | 17.64% (16.24 to 19.05%) | 0.717   |
| Andrews et al., 2022     | Symptomatic Infection | Cohort       | mRNA-1273       | 16.52% (12.45 to 20.59%) | 2.075   |
| Buchan et al., 2021      | Symptomatic Infection | Case-control | mixture of mRNA | 27.25% (-5.06 to 59.56%) | 16.485  |
| Chemaitelly et al., 2022 | Symptomatic Infection | Case-control | BNT162b2        | 0% (-6.08 to 6.08%)      | 3.103   |
| Chemaitelly et al., 2022 | Symptomatic Infection | Case-control | mRNA-1273       | 33% (-21.38 to 87.38%)   | 27.744  |
| Tartof et al., 2022      | Symptomatic Infection | Case-control | BNT162b2        | -5.72% (-19.59 to 8.15%) | 7.077   |
| Abu-Raddad et al., 2022  | Symptomatic Infection | Cohort       | BNT162b2        | -7.7% (-38.69 to 23.29%) | 15.812  |
| Abu-Raddad et al., 2022  | Symptomatic Infection | Cohort       | mRNA-1273       | 2% (-8.26 to 12.26%)     | 5.234   |
| Natarajan et al., 2022   | Symptomatic Infection | Case-control | mixture of mRNA | 27.6% (19.15 to 36.06%)  | 4.314   |
| Klein et al., 2022       | symptomatic Infection | Case-control | BNT162b2        | 33% (23.82 to 42.18%)    | 4.683   |
| Ferdinand et al., 2022   | symptomatic Infection | Case-control | mixture of mRNA | 19% (-2.97 to 40.97%)    | 11.207  |
| Buchan et al., 2021      | Severe infection      | Case-control | mixture of mRNA | -3.1% (-6.29 to 0.09%)   | 1.625   |



|                         |                   |              |                 |                          |       |
|-------------------------|-------------------|--------------|-----------------|--------------------------|-------|
| Lauring et al., 2022    | Severe infection  | Case-control | mixture of mRNA | -3.5% (-6.45 to -0.55%)  | 1.507 |
| Tartof et al., 2022     | Severe infection  | Case-control | BNT162b2        | 42% (32 to 52%)          | 5.102 |
| Smid et al., 2022       | Severe infection  | Case-control | Mixture         | 3.5% (0.17 to 6.83%)     | 1.697 |
| Abu-Raddad et al., 2022 | Severe infection  | Cohort       | BNT162b2        | 50.6% (48.35 to 52.85%)  | 1.148 |
| Natarajan et al., 2022  | Severe infection  | Case-control | mixture of mRNA | 23.5% (7.7 to 39.3%)     | 8.061 |
| Tenforde et al., 2022   | Severe infection  | Case-control | mixture of mRNA | 52.7% (46.4 to 59%)      | 3.214 |
| Hansen et al., 2022     | Positive Covid-19 | Cohort       | BNT162b2        | 29% (18.95 to 39.05%)    | 5.127 |
| Tseng et al., 2022      | Positive Covid-19 | Case-control | mRNA-1273       | 17.5% (7.26 to 27.74%)   | 5.225 |
| Monge et al., 2022      | Positive Covid-19 | Case-control | mRNA-1273       | 15% (3.58 to 26.42%)     | 5.828 |
| Monge et al., 2022      | Positive Covid-19 | Design       | BNT162b2        | 30% (12.93 to 47.07%)    | 8.71  |
| Smid et al., 2022       | Positive Covid-19 | Cohort       | Mixture         | 22.33% (16.11 to 28.56%) | 3.176 |

## S.8. Detailed Results of VE Estimates and VE Reduction of Full Dose

Table S9. Detailed results of VE estimates and VE reduction of full dose for any infection outcome

| Variable | Overall                                                                                                                                                                                                                                                                                                                                                                                                                                                                                                                                                                                                                                                                                                                                                                                                                                                                                                                                                                                                                                                                                                                                                                                                                                                            | Report |          |    |        |         |         |       |       |  |         |         |        |        |    |        |         |         |     |      |         |        |         |    |        |         |         |    |                                                                                                                                                                                                                    |
|----------|--------------------------------------------------------------------------------------------------------------------------------------------------------------------------------------------------------------------------------------------------------------------------------------------------------------------------------------------------------------------------------------------------------------------------------------------------------------------------------------------------------------------------------------------------------------------------------------------------------------------------------------------------------------------------------------------------------------------------------------------------------------------------------------------------------------------------------------------------------------------------------------------------------------------------------------------------------------------------------------------------------------------------------------------------------------------------------------------------------------------------------------------------------------------------------------------------------------------------------------------------------------------|--------|----------|----|--------|---------|---------|-------|-------|--|---------|---------|--------|--------|----|--------|---------|---------|-----|------|---------|--------|---------|----|--------|---------|---------|----|--------------------------------------------------------------------------------------------------------------------------------------------------------------------------------------------------------------------|
| Results  | <p>Mixed-Effects Model (k = 93; tau<sup>2</sup> estimator: REML)</p> <p>logLik deviance AIC BIC AICc<br/>-434.8900 869.7800 875.7800 883.3125 876.0558</p> <p>tau<sup>2</sup> (estimated amount of residual heterogeneity): 741.3064 (SE = 118.5740)<br/>tau (square root of estimated tau<sup>2</sup> value): 27.2269<br/>I<sup>2</sup> (residual heterogeneity / unaccounted variability): 99.50%<br/>H<sup>2</sup> (unaccounted variability / sampling variability): 199.94<br/>R<sup>2</sup> (amount of heterogeneity accounted for): 9.91%</p> <p>Test for Residual Heterogeneity:<br/>QE(df = 91) = 7954.7133, p-val &lt; .0001</p> <p>Test of Moderators (coefficient 2):<br/>F(df1 = 1, df2 = 91) = 8.9517, p-val = 0.0036</p> <p>Model Results:</p> <table> <thead> <tr> <th></th> <th>estimate</th> <th>se</th> <th>tval</th> <th>df</th> <th>pval</th> <th>ci.lb</th> <th>ci.ub</th> <th></th> </tr> </thead> <tbody> <tr> <td>intrcpt</td> <td>50.1200</td> <td>6.2132</td> <td>8.0667</td> <td>91</td> <td>&lt;.0001</td> <td>37.7783</td> <td>62.4618</td> <td>***</td> </tr> <tr> <td>Days</td> <td>-0.0985</td> <td>0.0329</td> <td>-2.9919</td> <td>91</td> <td>0.0036</td> <td>-0.1640</td> <td>-0.0331</td> <td>**</td> </tr> </tbody> </table> |        | estimate | se | tval   | df      | pval    | ci.lb | ci.ub |  | intrcpt | 50.1200 | 6.2132 | 8.0667 | 91 | <.0001 | 37.7783 | 62.4618 | *** | Days | -0.0985 | 0.0329 | -2.9919 | 91 | 0.0036 | -0.1640 | -0.0331 | ** | <p>R<sup>2</sup> = 9.91%</p> <p>VE estimate (%):<br/>50.12 (37.78 to 62.46), p:&lt;.0001</p> <p>VE reduction estimate (% per month):<br/>-2.955 (-4.92 to -0.993), p:0.0036</p> <p>VE (%) = 50.12 - 0.0985 day</p> |
|          | estimate                                                                                                                                                                                                                                                                                                                                                                                                                                                                                                                                                                                                                                                                                                                                                                                                                                                                                                                                                                                                                                                                                                                                                                                                                                                           | se     | tval     | df | pval   | ci.lb   | ci.ub   |       |       |  |         |         |        |        |    |        |         |         |     |      |         |        |         |    |        |         |         |    |                                                                                                                                                                                                                    |
| intrcpt  | 50.1200                                                                                                                                                                                                                                                                                                                                                                                                                                                                                                                                                                                                                                                                                                                                                                                                                                                                                                                                                                                                                                                                                                                                                                                                                                                            | 6.2132 | 8.0667   | 91 | <.0001 | 37.7783 | 62.4618 | ***   |       |  |         |         |        |        |    |        |         |         |     |      |         |        |         |    |        |         |         |    |                                                                                                                                                                                                                    |
| Days     | -0.0985                                                                                                                                                                                                                                                                                                                                                                                                                                                                                                                                                                                                                                                                                                                                                                                                                                                                                                                                                                                                                                                                                                                                                                                                                                                            | 0.0329 | -2.9919  | 91 | 0.0036 | -0.1640 | -0.0331 | **    |       |  |         |         |        |        |    |        |         |         |     |      |         |        |         |    |        |         |         |    |                                                                                                                                                                                                                    |

| Reg Plot             |                                                                                                                                                                                                                                                                                                                                                                                                                                                                                                  |      |         |   |         |                      |                        |      |        |                                                                                                                                                   |
|----------------------|--------------------------------------------------------------------------------------------------------------------------------------------------------------------------------------------------------------------------------------------------------------------------------------------------------------------------------------------------------------------------------------------------------------------------------------------------------------------------------------------------|------|---------|---|---------|----------------------|------------------------|------|--------|---------------------------------------------------------------------------------------------------------------------------------------------------|
| Variable             | Ad26.COV2.S                                                                                                                                                                                                                                                                                                                                                                                                                                                                                      |      |         |   |         |                      |                        |      |        |                                                                                                                                                   |
| Results              | <p>Number of studies combined: k = 2</p> <table border="1" data-bbox="358 1085 1120 1181"> <thead> <tr> <th>VE</th> <th>95%-CI</th> <th>t</th> <th>p-value</th> </tr> </thead> <tbody> <tr> <td>Random effects model</td> <td>59.94 [-22.34; 142.22]</td> <td>9.26</td> <td>0.0685</td> </tr> </tbody> </table> <p>Quantifying heterogeneity:<br/> <math>\tau^2 = 0.0051</math>; <math>\tau = 0.0715</math><br/> <math>I^2 = 60.5\%</math> [0.0%; 90.8%]; <math>H = 1.59</math> [1.00; 3.30]</p> | VE   | 95%-CI  | t | p-value | Random effects model | 59.94 [-22.34; 142.22] | 9.26 | 0.0685 | <p><math>I^2 = 60.5\%</math><br/> VE estimate (%):<br/> 59.94 (-22.34 to 142.22), p:0.0685<br/> VE reduction estimate (% per month):<br/> N/A</p> |
| VE                   | 95%-CI                                                                                                                                                                                                                                                                                                                                                                                                                                                                                           | t    | p-value |   |         |                      |                        |      |        |                                                                                                                                                   |
| Random effects model | 59.94 [-22.34; 142.22]                                                                                                                                                                                                                                                                                                                                                                                                                                                                           | 9.26 | 0.0685  |   |         |                      |                        |      |        |                                                                                                                                                   |

|           |                                                                                                                                                                                                                                                                                                                                                                                                                                                                                                                                                                                                                                                                                                                                                                                                                                                                                                                                                                                                                                                                                                                                                                                                                                                                                        |          |          |          |        |         |           |          |          |          |          |  |          |    |      |    |      |       |       |  |         |         |        |        |    |        |         |         |     |      |         |        |         |    |        |         |         |    |                                                                                                                                                                                          |
|-----------|----------------------------------------------------------------------------------------------------------------------------------------------------------------------------------------------------------------------------------------------------------------------------------------------------------------------------------------------------------------------------------------------------------------------------------------------------------------------------------------------------------------------------------------------------------------------------------------------------------------------------------------------------------------------------------------------------------------------------------------------------------------------------------------------------------------------------------------------------------------------------------------------------------------------------------------------------------------------------------------------------------------------------------------------------------------------------------------------------------------------------------------------------------------------------------------------------------------------------------------------------------------------------------------|----------|----------|----------|--------|---------|-----------|----------|----------|----------|----------|--|----------|----|------|----|------|-------|-------|--|---------|---------|--------|--------|----|--------|---------|---------|-----|------|---------|--------|---------|----|--------|---------|---------|----|------------------------------------------------------------------------------------------------------------------------------------------------------------------------------------------|
|           | Test of heterogeneity:<br>Q d.f. p-value<br>2.53 1 0.1114                                                                                                                                                                                                                                                                                                                                                                                                                                                                                                                                                                                                                                                                                                                                                                                                                                                                                                                                                                                                                                                                                                                                                                                                                              |          |          |          |        |         |           |          |          |          |          |  |          |    |      |    |      |       |       |  |         |         |        |        |    |        |         |         |     |      |         |        |         |    |        |         |         |    |                                                                                                                                                                                          |
| Reg Plot  | N/A                                                                                                                                                                                                                                                                                                                                                                                                                                                                                                                                                                                                                                                                                                                                                                                                                                                                                                                                                                                                                                                                                                                                                                                                                                                                                    |          |          |          |        |         |           |          |          |          |          |  |          |    |      |    |      |       |       |  |         |         |        |        |    |        |         |         |     |      |         |        |         |    |        |         |         |    |                                                                                                                                                                                          |
| Variable  | <b>BNT162b2</b>                                                                                                                                                                                                                                                                                                                                                                                                                                                                                                                                                                                                                                                                                                                                                                                                                                                                                                                                                                                                                                                                                                                                                                                                                                                                        |          |          |          |        |         |           |          |          |          |          |  |          |    |      |    |      |       |       |  |         |         |        |        |    |        |         |         |     |      |         |        |         |    |        |         |         |    |                                                                                                                                                                                          |
| Results   | Mixed-Effects Model (k = 38; tau^2 estimator: REML)<br><br><table> <tr> <td>logLik</td> <td>deviance</td> <td>AIC</td> <td>BIC</td> <td>AICc</td> </tr> <tr> <td>-171.6450</td> <td>343.2899</td> <td>349.2899</td> <td>354.0405</td> <td>350.0399</td> </tr> </table><br>tau^2 (estimated amount of residual heterogeneity): 717.3130 (SE = 183.0239)<br>tau (square root of estimated tau^2 value): 26.7827<br>I^2 (residual heterogeneity / unaccounted variability): 99.45%<br>H^2 (unaccounted variability / sampling variability): 181.89<br>R^2 (amount of heterogeneity accounted for): 24.08%<br><br>Test for Residual Heterogeneity:<br>QE(df = 36) = 1269.8612, p-val < .0001<br><br>Test of Moderators (coefficient 2):<br>F(df1 = 1, df2 = 36) = 10.4159, p-val = 0.0027<br><br>Model Results:<br><br><table> <tr> <td></td> <td>estimate</td> <td>se</td> <td>tval</td> <td>df</td> <td>pval</td> <td>ci.lb</td> <td>ci.ub</td> <td></td> </tr> <tr> <td>intrcpt</td> <td>54.6182</td> <td>9.3902</td> <td>5.8165</td> <td>36</td> <td>&lt;.0001</td> <td>35.5739</td> <td>73.6624</td> <td>***</td> </tr> <tr> <td>Days</td> <td>-0.1607</td> <td>0.0498</td> <td>-3.2274</td> <td>36</td> <td>0.0027</td> <td>-0.2617</td> <td>-0.0597</td> <td>**</td> </tr> </table> | logLik   | deviance | AIC      | BIC    | AICc    | -171.6450 | 343.2899 | 349.2899 | 354.0405 | 350.0399 |  | estimate | se | tval | df | pval | ci.lb | ci.ub |  | intrcpt | 54.6182 | 9.3902 | 5.8165 | 36 | <.0001 | 35.5739 | 73.6624 | *** | Days | -0.1607 | 0.0498 | -3.2274 | 36 | 0.0027 | -0.2617 | -0.0597 | ** | R^2 = 24.08%<br>VE estimate (%):<br>54.62 (35.57 to 73.66), p:<.0001<br>VE reduction estimate (% per month):<br>-4.821 (-7.851 to -1.791), p:0.0027<br><br>VE (%) = 54.6182 - 0.1607 day |
| logLik    | deviance                                                                                                                                                                                                                                                                                                                                                                                                                                                                                                                                                                                                                                                                                                                                                                                                                                                                                                                                                                                                                                                                                                                                                                                                                                                                               | AIC      | BIC      | AICc     |        |         |           |          |          |          |          |  |          |    |      |    |      |       |       |  |         |         |        |        |    |        |         |         |     |      |         |        |         |    |        |         |         |    |                                                                                                                                                                                          |
| -171.6450 | 343.2899                                                                                                                                                                                                                                                                                                                                                                                                                                                                                                                                                                                                                                                                                                                                                                                                                                                                                                                                                                                                                                                                                                                                                                                                                                                                               | 349.2899 | 354.0405 | 350.0399 |        |         |           |          |          |          |          |  |          |    |      |    |      |       |       |  |         |         |        |        |    |        |         |         |     |      |         |        |         |    |        |         |         |    |                                                                                                                                                                                          |
|           | estimate                                                                                                                                                                                                                                                                                                                                                                                                                                                                                                                                                                                                                                                                                                                                                                                                                                                                                                                                                                                                                                                                                                                                                                                                                                                                               | se       | tval     | df       | pval   | ci.lb   | ci.ub     |          |          |          |          |  |          |    |      |    |      |       |       |  |         |         |        |        |    |        |         |         |     |      |         |        |         |    |        |         |         |    |                                                                                                                                                                                          |
| intrcpt   | 54.6182                                                                                                                                                                                                                                                                                                                                                                                                                                                                                                                                                                                                                                                                                                                                                                                                                                                                                                                                                                                                                                                                                                                                                                                                                                                                                | 9.3902   | 5.8165   | 36       | <.0001 | 35.5739 | 73.6624   | ***      |          |          |          |  |          |    |      |    |      |       |       |  |         |         |        |        |    |        |         |         |     |      |         |        |         |    |        |         |         |    |                                                                                                                                                                                          |
| Days      | -0.1607                                                                                                                                                                                                                                                                                                                                                                                                                                                                                                                                                                                                                                                                                                                                                                                                                                                                                                                                                                                                                                                                                                                                                                                                                                                                                | 0.0498   | -3.2274  | 36       | 0.0027 | -0.2617 | -0.0597   | **       |          |          |          |  |          |    |      |    |      |       |       |  |         |         |        |        |    |        |         |         |     |      |         |        |         |    |        |         |         |    |                                                                                                                                                                                          |

|          |                                                                                                                                                                                                                                                                                                                                                                                                                                                                                                                                                                                                                                                                             |         |          |         |     |      |         |         |         |         |         |                                                                                                                                                                                                                             |
|----------|-----------------------------------------------------------------------------------------------------------------------------------------------------------------------------------------------------------------------------------------------------------------------------------------------------------------------------------------------------------------------------------------------------------------------------------------------------------------------------------------------------------------------------------------------------------------------------------------------------------------------------------------------------------------------------|---------|----------|---------|-----|------|---------|---------|---------|---------|---------|-----------------------------------------------------------------------------------------------------------------------------------------------------------------------------------------------------------------------------|
| Reg Plot |                                                                                                                                                                                                                                                                                                                                                                                                                                                                                                                                                                                                                                                                             |         |          |         |     |      |         |         |         |         |         |                                                                                                                                                                                                                             |
| Variable | ChAdOx1 nCov-19                                                                                                                                                                                                                                                                                                                                                                                                                                                                                                                                                                                                                                                             |         |          |         |     |      |         |         |         |         |         |                                                                                                                                                                                                                             |
| Results  | <p>Mixed-Effects Model (k = 6; tau<sup>2</sup> estimator: REML)</p> <table border="0"> <tr> <td>logLik</td> <td>deviance</td> <td>AIC</td> <td>BIC</td> <td>AICc</td> </tr> <tr> <td>-9.6120</td> <td>19.2241</td> <td>25.2241</td> <td>23.3830</td> <td>49.2241</td> </tr> </table> <p>tau<sup>2</sup> (estimated amount of residual heterogeneity): 2.8159 (SE = 4.7880)<br/> tau (square root of estimated tau<sup>2</sup> value): 1.6781<br/> I<sup>2</sup> (residual heterogeneity / unaccounted variability): 46.23%<br/> H<sup>2</sup> (unaccounted variability / sampling variability): 1.86<br/> R<sup>2</sup> (amount of heterogeneity accounted for): 99.22%</p> | logLik  | deviance | AIC     | BIC | AICc | -9.6120 | 19.2241 | 25.2241 | 23.3830 | 49.2241 | <p>R<sup>2</sup> = 99.22%<br/> VE estimate (%):<br/> 56.03 (47.81 to 64.25), p:&lt;.0001<br/> VE reduction estimate (% per month):<br/> -8.532 (-9.978 to -7.089), p:&lt;.0001<br/> <br/> VE (%) = 56.0307 - 0.2844 day</p> |
| logLik   | deviance                                                                                                                                                                                                                                                                                                                                                                                                                                                                                                                                                                                                                                                                    | AIC     | BIC      | AICc    |     |      |         |         |         |         |         |                                                                                                                                                                                                                             |
| -9.6120  | 19.2241                                                                                                                                                                                                                                                                                                                                                                                                                                                                                                                                                                                                                                                                     | 25.2241 | 23.3830  | 49.2241 |     |      |         |         |         |         |         |                                                                                                                                                                                                                             |

Test for Residual Heterogeneity:  
QE(df = 4) = 6.9972, p-val = 0.1360

Test of Moderators (coefficient 2):  
F(df1 = 1, df2 = 4) = 269.3835, p-val < .0001

Model Results:

|         | estimate | se     | tval     | df | pval   | ci.lb   | ci.ub   |     |
|---------|----------|--------|----------|----|--------|---------|---------|-----|
| intrcpt | 56.0307  | 2.9616 | 18.9192  | 4  | <.0001 | 47.8081 | 64.2534 | *** |
| Days    | -0.2844  | 0.0173 | -16.4129 | 4  | <.0001 | -0.3326 | -0.2363 | *** |

Reg Plot

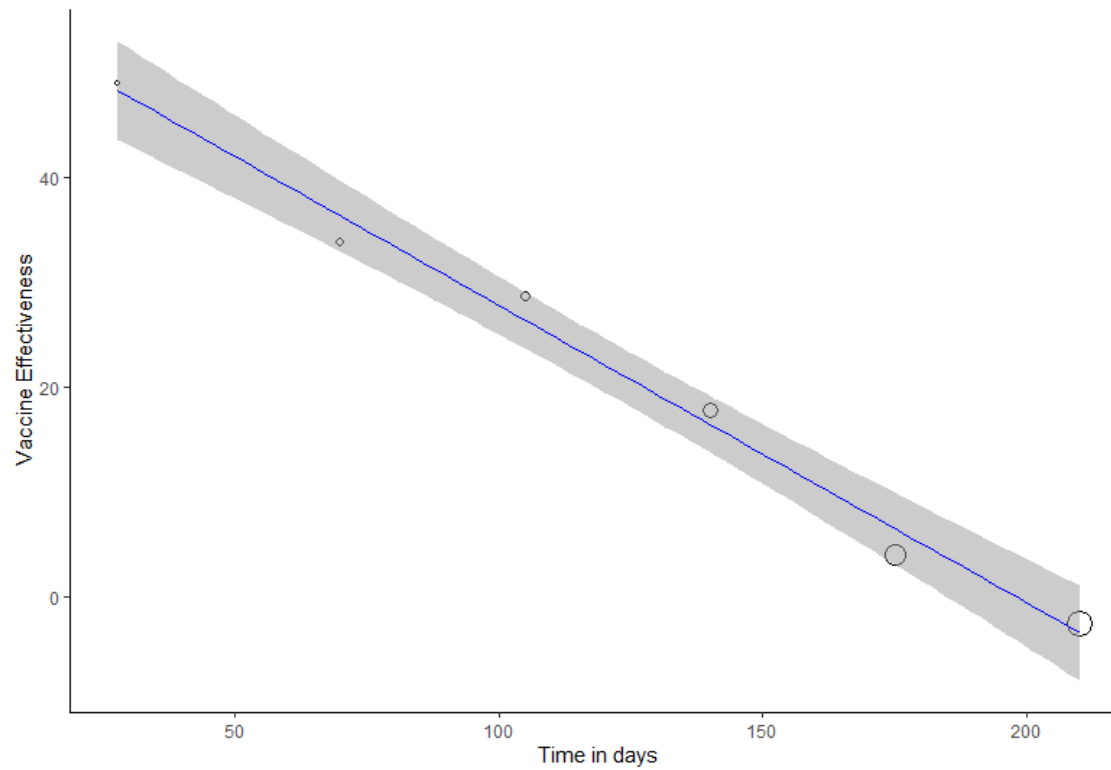

Variable

Mixture

| Results | <p>Mixed-Effects Model (k = 4; tau<sup>2</sup> estimator: REML)</p> <p>logLik deviance    AIC    BIC    AICc<br/> -7.5277  15.0555  21.0555  17.1349  45.0555</p> <p>tau<sup>2</sup> (estimated amount of residual heterogeneity):  99.6973 (SE = 115.8024)<br/> tau (square root of estimated tau<sup>2</sup> value):  9.9849<br/> I<sup>2</sup> (residual heterogeneity / unaccounted variability): 88.68%<br/> H<sup>2</sup> (unaccounted variability / sampling variability): 8.84<br/> R<sup>2</sup> (amount of heterogeneity accounted for):  63.29%</p> <p>Test for Residual Heterogeneity:<br/> QE(df = 2) = 23.7186, p-val &lt; .0001</p> <p>Test of Moderators (coefficient 2):<br/> F(df1 = 1, df2 = 2) = 6.1503, p-val = 0.1313</p> <p>Model Results:</p> <table border="1"> <thead> <tr> <th></th> <th>estimate</th> <th>se</th> <th>tval</th> <th>df</th> <th>pval</th> <th>ci.lb</th> <th>ci.ub</th> </tr> </thead> <tbody> <tr> <td>intrcpt</td> <td>69.3531</td> <td>16.5628</td> <td>4.1873</td> <td>2</td> <td>0.0526</td> <td>-1.9107</td> <td>140.6170</td> </tr> <tr> <td>Days</td> <td>-0.4259</td> <td>0.1717</td> <td>-2.4800</td> <td>2</td> <td>0.1313</td> <td>-1.1649</td> <td>0.3130</td> </tr> </tbody> </table> |         | estimate | se | tval   | df      | pval     | ci.lb | ci.ub | intrcpt | 69.3531 | 16.5628 | 4.1873 | 2 | 0.0526 | -1.9107 | 140.6170 | Days | -0.4259 | 0.1717 | -2.4800 | 2 | 0.1313 | -1.1649 | 0.3130 | <p>R<sup>2</sup> = 63.29%</p> <p>VE estimate (%):<br/> 69.35 (-1.91 to 140.62), p:0.0526</p> <p>VE reduction estimate (% per month):<br/> -12.777 (-34.947 to 9.39), p:0.1313</p> <p>VE (%) = 69.3531 - 0.4259 day</p> |
|---------|-------------------------------------------------------------------------------------------------------------------------------------------------------------------------------------------------------------------------------------------------------------------------------------------------------------------------------------------------------------------------------------------------------------------------------------------------------------------------------------------------------------------------------------------------------------------------------------------------------------------------------------------------------------------------------------------------------------------------------------------------------------------------------------------------------------------------------------------------------------------------------------------------------------------------------------------------------------------------------------------------------------------------------------------------------------------------------------------------------------------------------------------------------------------------------------------------------------------------------------------------|---------|----------|----|--------|---------|----------|-------|-------|---------|---------|---------|--------|---|--------|---------|----------|------|---------|--------|---------|---|--------|---------|--------|------------------------------------------------------------------------------------------------------------------------------------------------------------------------------------------------------------------------|
|         | estimate                                                                                                                                                                                                                                                                                                                                                                                                                                                                                                                                                                                                                                                                                                                                                                                                                                                                                                                                                                                                                                                                                                                                                                                                                                        | se      | tval     | df | pval   | ci.lb   | ci.ub    |       |       |         |         |         |        |   |        |         |          |      |         |        |         |   |        |         |        |                                                                                                                                                                                                                        |
| intrcpt | 69.3531                                                                                                                                                                                                                                                                                                                                                                                                                                                                                                                                                                                                                                                                                                                                                                                                                                                                                                                                                                                                                                                                                                                                                                                                                                         | 16.5628 | 4.1873   | 2  | 0.0526 | -1.9107 | 140.6170 |       |       |         |         |         |        |   |        |         |          |      |         |        |         |   |        |         |        |                                                                                                                                                                                                                        |
| Days    | -0.4259                                                                                                                                                                                                                                                                                                                                                                                                                                                                                                                                                                                                                                                                                                                                                                                                                                                                                                                                                                                                                                                                                                                                                                                                                                         | 0.1717  | -2.4800  | 2  | 0.1313 | -1.1649 | 0.3130   |       |       |         |         |         |        |   |        |         |          |      |         |        |         |   |        |         |        |                                                                                                                                                                                                                        |

|           |                                                                                                                                                                                                                                                                                                                                                                                                                                                                                                                                                                                                                                                                                                                                                                               |          |          |          |     |      |           |          |          |          |          |                                                                                                                                                                                                                 |
|-----------|-------------------------------------------------------------------------------------------------------------------------------------------------------------------------------------------------------------------------------------------------------------------------------------------------------------------------------------------------------------------------------------------------------------------------------------------------------------------------------------------------------------------------------------------------------------------------------------------------------------------------------------------------------------------------------------------------------------------------------------------------------------------------------|----------|----------|----------|-----|------|-----------|----------|----------|----------|----------|-----------------------------------------------------------------------------------------------------------------------------------------------------------------------------------------------------------------|
| Reg Plot  | 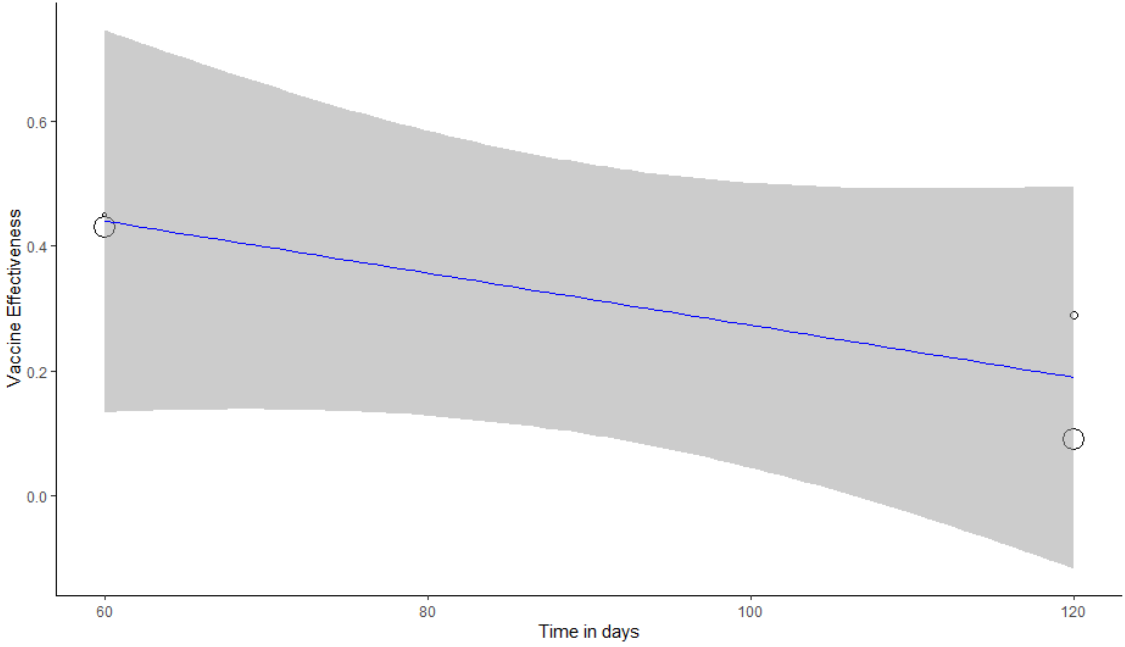                                                                                                                                                                                                                                                                                                                                                                                                                                                                                                                                                                                                                                                                                            |          |          |          |     |      |           |          |          |          |          |                                                                                                                                                                                                                 |
| Variable  | Mixture of mRNA vaccines                                                                                                                                                                                                                                                                                                                                                                                                                                                                                                                                                                                                                                                                                                                                                      |          |          |          |     |      |           |          |          |          |          |                                                                                                                                                                                                                 |
| Results   | <p>Mixed-Effects Model (k = 25; tau<sup>2</sup> estimator: REML)</p> <table border="0"> <tr> <td>logLik</td> <td>deviance</td> <td>AIC</td> <td>BIC</td> <td>AICc</td> </tr> <tr> <td>-108.0914</td> <td>216.1827</td> <td>222.1827</td> <td>225.5892</td> <td>223.4459</td> </tr> </table> <p>tau<sup>2</sup> (estimated amount of residual heterogeneity): 613.3061 (SE = 201.1280)<br/> tau (square root of estimated tau<sup>2</sup> value): 24.7650<br/> I<sup>2</sup> (residual heterogeneity / unaccounted variability): 97.50%<br/> H<sup>2</sup> (unaccounted variability / sampling variability): 40.05<br/> R<sup>2</sup> (amount of heterogeneity accounted for): 0.00%</p> <p>Test for Residual Heterogeneity:<br/> QE(df = 23) = 628.4139, p-val &lt; .0001</p> | logLik   | deviance | AIC      | BIC | AICc | -108.0914 | 216.1827 | 222.1827 | 225.5892 | 223.4459 | <p>R<sup>2</sup> = 0%<br/> VE estimate (%):<br/> 62.47 (36.03 to 88.91), p:&lt;.0001<br/> VE reduction estimate (% per month):<br/> -1.536 (-5.142 to 2.067), p:0.3868</p> <p>VE (%) = 62.4733 - 0.0512 day</p> |
| logLik    | deviance                                                                                                                                                                                                                                                                                                                                                                                                                                                                                                                                                                                                                                                                                                                                                                      | AIC      | BIC      | AICc     |     |      |           |          |          |          |          |                                                                                                                                                                                                                 |
| -108.0914 | 216.1827                                                                                                                                                                                                                                                                                                                                                                                                                                                                                                                                                                                                                                                                                                                                                                      | 222.1827 | 225.5892 | 223.4459 |     |      |           |          |          |          |          |                                                                                                                                                                                                                 |



|          | <p>Test of Moderators (coefficient 2):<br/> <math>F(df1 = 1, df2 = 23) = 0.7783, p\text{-val} = 0.3868</math></p> <p>Model Results:</p> <table border="1"> <thead> <tr> <th></th> <th>estimate</th> <th>se</th> <th>tval</th> <th>df</th> <th>pval</th> <th>ci.lb</th> <th>ci.ub</th> <th></th> </tr> </thead> <tbody> <tr> <td>intrcpt</td> <td>62.4733</td> <td>12.7813</td> <td>4.8879</td> <td>23</td> <td>&lt;.0001</td> <td>36.0331</td> <td>88.9135</td> <td>***</td> </tr> <tr> <td>Days</td> <td>-0.0512</td> <td>0.0581</td> <td>-0.8822</td> <td>23</td> <td>0.3868</td> <td>-0.1714</td> <td>0.0689</td> <td></td> </tr> </tbody> </table> |         | estimate | se       | tval   | df      | pval    | ci.lb | ci.ub |  | intrcpt | 62.4733 | 12.7813                             | 4.8879 | 23 | <.0001 | 36.0331 | 88.9135 | *** | Days | -0.0512 | 0.0581 | -0.8822 | 23 | 0.3868 | -0.1714 | 0.0689 |  |  |
|----------|--------------------------------------------------------------------------------------------------------------------------------------------------------------------------------------------------------------------------------------------------------------------------------------------------------------------------------------------------------------------------------------------------------------------------------------------------------------------------------------------------------------------------------------------------------------------------------------------------------------------------------------------------------|---------|----------|----------|--------|---------|---------|-------|-------|--|---------|---------|-------------------------------------|--------|----|--------|---------|---------|-----|------|---------|--------|---------|----|--------|---------|--------|--|--|
|          | estimate                                                                                                                                                                                                                                                                                                                                                                                                                                                                                                                                                                                                                                               | se      | tval     | df       | pval   | ci.lb   | ci.ub   |       |       |  |         |         |                                     |        |    |        |         |         |     |      |         |        |         |    |        |         |        |  |  |
| intrcpt  | 62.4733                                                                                                                                                                                                                                                                                                                                                                                                                                                                                                                                                                                                                                                | 12.7813 | 4.8879   | 23       | <.0001 | 36.0331 | 88.9135 | ***   |       |  |         |         |                                     |        |    |        |         |         |     |      |         |        |         |    |        |         |        |  |  |
| Days     | -0.0512                                                                                                                                                                                                                                                                                                                                                                                                                                                                                                                                                                                                                                                | 0.0581  | -0.8822  | 23       | 0.3868 | -0.1714 | 0.0689  |       |       |  |         |         |                                     |        |    |        |         |         |     |      |         |        |         |    |        |         |        |  |  |
| Reg Plot |                                                                                                                                                                                                                                                                                                                                                                                                                                                                                                                                                                                                                                                        |         |          |          |        |         |         |       |       |  |         |         |                                     |        |    |        |         |         |     |      |         |        |         |    |        |         |        |  |  |
| Variable | mRNA-1273                                                                                                                                                                                                                                                                                                                                                                                                                                                                                                                                                                                                                                              |         |          |          |        |         |         |       |       |  |         |         |                                     |        |    |        |         |         |     |      |         |        |         |    |        |         |        |  |  |
| Results  | Mixed-Effects Model (k = 18; tau^2 estimator: REML) <table border="1"> <thead> <tr> <th>logLik</th> <th>deviance</th> <th>AIC</th> <th>BIC</th> <th>AICc</th> </tr> </thead> <tbody> <tr> <td></td> <td></td> <td></td> <td></td> <td></td> </tr> </tbody> </table>                                                                                                                                                                                                                                                                                                                                                                                    |         | logLik   | deviance | AIC    | BIC     | AICc    |       |       |  |         |         | $R^2 = 42.33\%$<br>VE estimate (%): |        |    |        |         |         |     |      |         |        |         |    |        |         |        |  |  |
| logLik   | deviance                                                                                                                                                                                                                                                                                                                                                                                                                                                                                                                                                                                                                                               | AIC     | BIC      | AICc     |        |         |         |       |       |  |         |         |                                     |        |    |        |         |         |     |      |         |        |         |    |        |         |        |  |  |
|          |                                                                                                                                                                                                                                                                                                                                                                                                                                                                                                                                                                                                                                                        |         |          |          |        |         |         |       |       |  |         |         |                                     |        |    |        |         |         |     |      |         |        |         |    |        |         |        |  |  |

| <p>-71.7588 143.5177 149.5177 151.8354 151.5177</p> <p>tau^2 (estimated amount of residual heterogeneity): 346.2541 (SE = 140.5909)<br/> tau (square root of estimated tau^2 value): 18.6079<br/> I^2 (residual heterogeneity / unaccounted variability): 98.12%<br/> H^2 (unaccounted variability / sampling variability): 53.13<br/> R^2 (amount of heterogeneity accounted for): 42.33%</p> <p>Test for Residual Heterogeneity:<br/> QE(df = 16) = 344.1080, p-val &lt; .0001</p> <p>Test of Moderators (coefficient 2):<br/> F(df1 = 1, df2 = 16) = 9.7084, p-val = 0.0067</p> <p>Model Results:</p> <table border="1"> <thead> <tr> <th></th> <th>estimate</th> <th>se</th> <th>tval</th> <th>df</th> <th>pval</th> <th>ci.lb</th> <th>ci.up</th> <th></th> </tr> </thead> <tbody> <tr> <td>intrcpt</td> <td>51.8048</td> <td>10.5712</td> <td>4.9006</td> <td>16</td> <td>0.0002</td> <td>29.3949</td> <td>74.2146</td> <td>***</td> </tr> <tr> <td>Days</td> <td>-0.1780</td> <td>0.0571</td> <td>-3.1158</td> <td>16</td> <td>0.0067</td> <td>-0.2991</td> <td>-0.0569</td> <td>**</td> </tr> </tbody> </table> |          | estimate | se      | tval | df     | pval    | ci.lb   | ci.up |  | intrcpt | 51.8048 | 10.5712 | 4.9006 | 16 | 0.0002 | 29.3949 | 74.2146 | *** | Days | -0.1780 | 0.0571 | -3.1158 | 16 | 0.0067 | -0.2991 | -0.0569 | ** | <p>51.8 (29.39 to 74.21), p:0.0002<br/> VE reduction estimate (% per month):<br/> -5.34 (-8.973 to -1.707), p:0.0067</p> <p>VE (%) = 51.8048 - 0.178 day</p> |
|-------------------------------------------------------------------------------------------------------------------------------------------------------------------------------------------------------------------------------------------------------------------------------------------------------------------------------------------------------------------------------------------------------------------------------------------------------------------------------------------------------------------------------------------------------------------------------------------------------------------------------------------------------------------------------------------------------------------------------------------------------------------------------------------------------------------------------------------------------------------------------------------------------------------------------------------------------------------------------------------------------------------------------------------------------------------------------------------------------------------------|----------|----------|---------|------|--------|---------|---------|-------|--|---------|---------|---------|--------|----|--------|---------|---------|-----|------|---------|--------|---------|----|--------|---------|---------|----|--------------------------------------------------------------------------------------------------------------------------------------------------------------|
|                                                                                                                                                                                                                                                                                                                                                                                                                                                                                                                                                                                                                                                                                                                                                                                                                                                                                                                                                                                                                                                                                                                         | estimate | se       | tval    | df   | pval   | ci.lb   | ci.up   |       |  |         |         |         |        |    |        |         |         |     |      |         |        |         |    |        |         |         |    |                                                                                                                                                              |
| intrcpt                                                                                                                                                                                                                                                                                                                                                                                                                                                                                                                                                                                                                                                                                                                                                                                                                                                                                                                                                                                                                                                                                                                 | 51.8048  | 10.5712  | 4.9006  | 16   | 0.0002 | 29.3949 | 74.2146 | ***   |  |         |         |         |        |    |        |         |         |     |      |         |        |         |    |        |         |         |    |                                                                                                                                                              |
| Days                                                                                                                                                                                                                                                                                                                                                                                                                                                                                                                                                                                                                                                                                                                                                                                                                                                                                                                                                                                                                                                                                                                    | -0.1780  | 0.0571   | -3.1158 | 16   | 0.0067 | -0.2991 | -0.0569 | **    |  |         |         |         |        |    |        |         |         |     |      |         |        |         |    |        |         |         |    |                                                                                                                                                              |

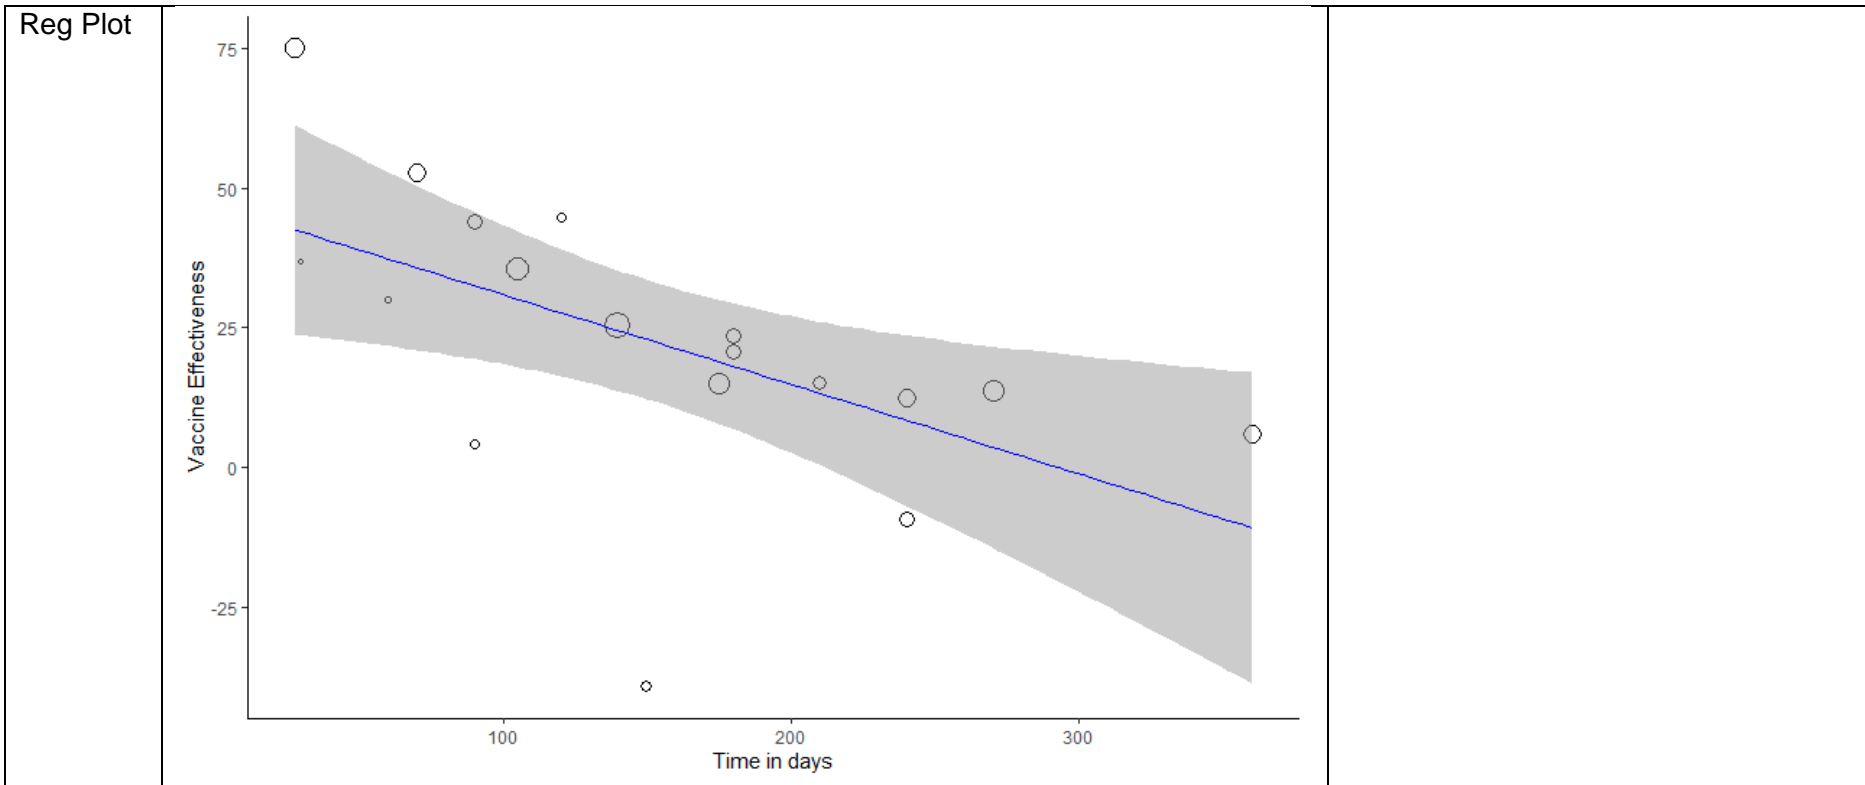

Cell is denoted as **green** if meta-regression is performed (i.e., if  $k > 3$ ). Cell is denoted as **yellow** if the result is calculated from meta-analysis of two reports ( $k = 2$ ).

Table S10. Detailed results of VE estimates and VE reduction of full dose for severe infection outcome

| Variable | overall                                                                                                                                                                                                                                                                                                                                                                                                                                                                                                                                                                                                                                                                                                                                                                                                                                                                                                                                                                                                                                                                                                                                                                                                                                                                |        |          |    |        |         |         |       |       |  |         |         |        |        |    |        |         |         |     |      |         |        |         |    |        |         |        |  |                                                                                                                                                                                                                 |
|----------|------------------------------------------------------------------------------------------------------------------------------------------------------------------------------------------------------------------------------------------------------------------------------------------------------------------------------------------------------------------------------------------------------------------------------------------------------------------------------------------------------------------------------------------------------------------------------------------------------------------------------------------------------------------------------------------------------------------------------------------------------------------------------------------------------------------------------------------------------------------------------------------------------------------------------------------------------------------------------------------------------------------------------------------------------------------------------------------------------------------------------------------------------------------------------------------------------------------------------------------------------------------------|--------|----------|----|--------|---------|---------|-------|-------|--|---------|---------|--------|--------|----|--------|---------|---------|-----|------|---------|--------|---------|----|--------|---------|--------|--|-----------------------------------------------------------------------------------------------------------------------------------------------------------------------------------------------------------------|
| Results  | <p>Mixed-Effects Model (k = 15; tau<sup>2</sup> estimator: REML)</p> <p>logLik deviance AIC BIC AICc<br/>-54.6842 109.3685 115.3685 117.0633 118.0351</p> <p>tau<sup>2</sup> (estimated amount of residual heterogeneity): 235.8090 (SE = 108.9539)<br/>tau (square root of estimated tau<sup>2</sup> value): 15.3561<br/>I<sup>2</sup> (residual heterogeneity / unaccounted variability): 88.26%<br/>H<sup>2</sup> (unaccounted variability / sampling variability): 8.52<br/>R<sup>2</sup> (amount of heterogeneity accounted for): 0.00%</p> <p>Test for Residual Heterogeneity:<br/>QE(df = 13) = 145.4933, p-val &lt; .0001</p> <p>Test of Moderators (coefficient 2):<br/>F(df1 = 1, df2 = 13) = 0.1494, p-val = 0.7053</p> <p>Model Results:</p> <table border="1"> <thead> <tr> <th></th> <th>estimate</th> <th>se</th> <th>tval</th> <th>df</th> <th>pval</th> <th>ci.lb</th> <th>ci.ub</th> <th></th> </tr> </thead> <tbody> <tr> <td>intrcpt</td> <td>68.2800</td> <td>9.0585</td> <td>7.5377</td> <td>13</td> <td>&lt;.0001</td> <td>48.7104</td> <td>87.8497</td> <td>***</td> </tr> <tr> <td>Days</td> <td>-0.0178</td> <td>0.0460</td> <td>-0.3865</td> <td>13</td> <td>0.7053</td> <td>-0.1172</td> <td>0.0817</td> <td></td> </tr> </tbody> </table> |        | estimate | se | tval   | df      | pval    | ci.lb | ci.ub |  | intrcpt | 68.2800 | 9.0585 | 7.5377 | 13 | <.0001 | 48.7104 | 87.8497 | *** | Days | -0.0178 | 0.0460 | -0.3865 | 13 | 0.7053 | -0.1172 | 0.0817 |  | <p>R<sup>2</sup> = 0%</p> <p>VE estimate (%):<br/>68.28 (48.71 to 87.85), p:&lt;.0001</p> <p>VE reduction estimate (% per month):<br/>-0.534 (-3.516 to 2.451), p:0.7053</p> <p>VE (%) = 68.28 - 0.0178 day</p> |
|          | estimate                                                                                                                                                                                                                                                                                                                                                                                                                                                                                                                                                                                                                                                                                                                                                                                                                                                                                                                                                                                                                                                                                                                                                                                                                                                               | se     | tval     | df | pval   | ci.lb   | ci.ub   |       |       |  |         |         |        |        |    |        |         |         |     |      |         |        |         |    |        |         |        |  |                                                                                                                                                                                                                 |
| intrcpt  | 68.2800                                                                                                                                                                                                                                                                                                                                                                                                                                                                                                                                                                                                                                                                                                                                                                                                                                                                                                                                                                                                                                                                                                                                                                                                                                                                | 9.0585 | 7.5377   | 13 | <.0001 | 48.7104 | 87.8497 | ***   |       |  |         |         |        |        |    |        |         |         |     |      |         |        |         |    |        |         |        |  |                                                                                                                                                                                                                 |
| Days     | -0.0178                                                                                                                                                                                                                                                                                                                                                                                                                                                                                                                                                                                                                                                                                                                                                                                                                                                                                                                                                                                                                                                                                                                                                                                                                                                                | 0.0460 | -0.3865  | 13 | 0.7053 | -0.1172 | 0.0817  |       |       |  |         |         |        |        |    |        |         |         |     |      |         |        |         |    |        |         |        |  |                                                                                                                                                                                                                 |

|          |                                                                                                                                                                                                                                                                                                                                                                                                                                                      |                                                                                                                                                                                              |
|----------|------------------------------------------------------------------------------------------------------------------------------------------------------------------------------------------------------------------------------------------------------------------------------------------------------------------------------------------------------------------------------------------------------------------------------------------------------|----------------------------------------------------------------------------------------------------------------------------------------------------------------------------------------------|
| Reg Plot | 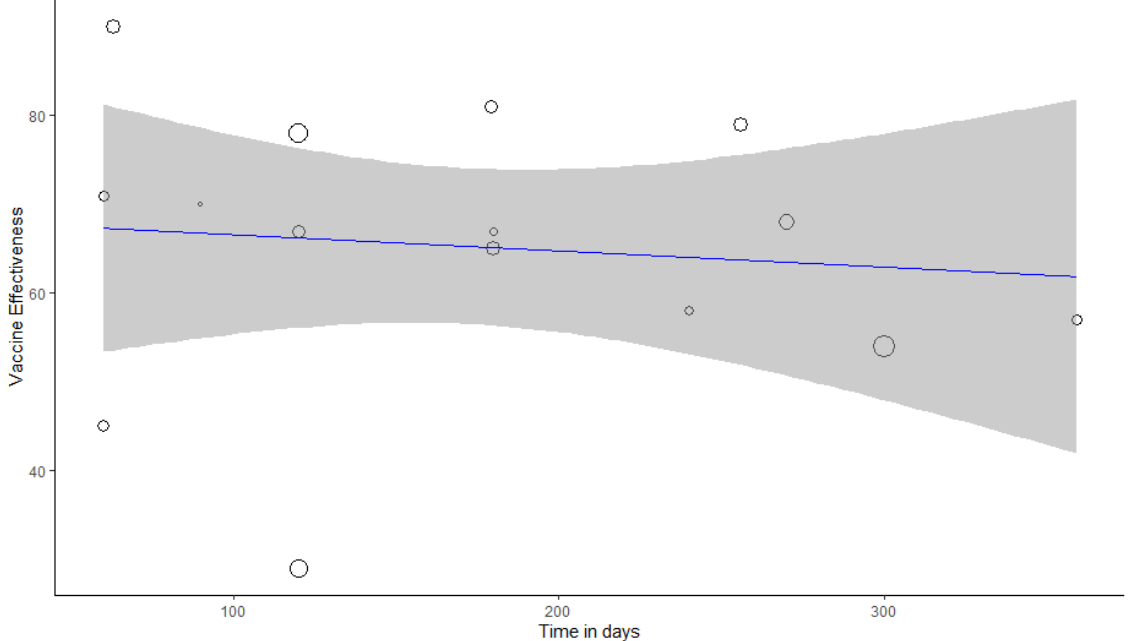                                                                                                                                                                                                                                                                                                                                                                   |                                                                                                                                                                                              |
| Variable | Ad26.COV2.S                                                                                                                                                                                                                                                                                                                                                                                                                                          |                                                                                                                                                                                              |
| Results  | VE estimate (%): 67 (52 to 77)                                                                                                                                                                                                                                                                                                                                                                                                                       | VE estimate (%): 67 (52 to 77)<br>VE reduction estimate (% per month): N/A                                                                                                                   |
| Reg Plot | N/A                                                                                                                                                                                                                                                                                                                                                                                                                                                  |                                                                                                                                                                                              |
| Variable | BNT162b2                                                                                                                                                                                                                                                                                                                                                                                                                                             |                                                                                                                                                                                              |
| Results  | Mixed-Effects Model (k = 4; tau <sup>2</sup> estimator: REML)<br><br>tau <sup>2</sup> (estimated amount of residual heterogeneity): 37.0869 (SE = 110.2998)<br>tau (square root of estimated tau <sup>2</sup> value): 6.0899<br>I <sup>2</sup> (residual heterogeneity / unaccounted variability): 33.62%<br>H <sup>2</sup> (unaccounted variability / sampling variability): 1.51<br>R <sup>2</sup> (amount of heterogeneity accounted for): 63.40% | R <sup>2</sup> = 63.4%<br>VE estimate (%): 89.88 (50.39 to 129.38), p:0.0103<br>VE reduction estimate (% per month): -2.715 (-9.177 to 3.747), p:0.2125<br><br>VE (%) = 89.8824 - 0.0905 day |

Test for Residual Heterogeneity:  
 QE(df = 2) = 2.9009, p-val = 0.2345

Test of Moderators (coefficient 2):  
 F(df1 = 1, df2 = 2) = 3.2663, p-val = 0.2125

Model Results:

|         | estimate | se     | tval    | df | pval   | ci.lb   | ci.ub      |
|---------|----------|--------|---------|----|--------|---------|------------|
| intrcpt | 89.8824  | 9.1794 | 9.7918  | 2  | 0.0103 | 50.3867 | 129.3781 * |
| Days    | -0.0905  | 0.0501 | -1.8073 | 2  | 0.2125 | -0.3059 | 0.1249     |

Reg Plot

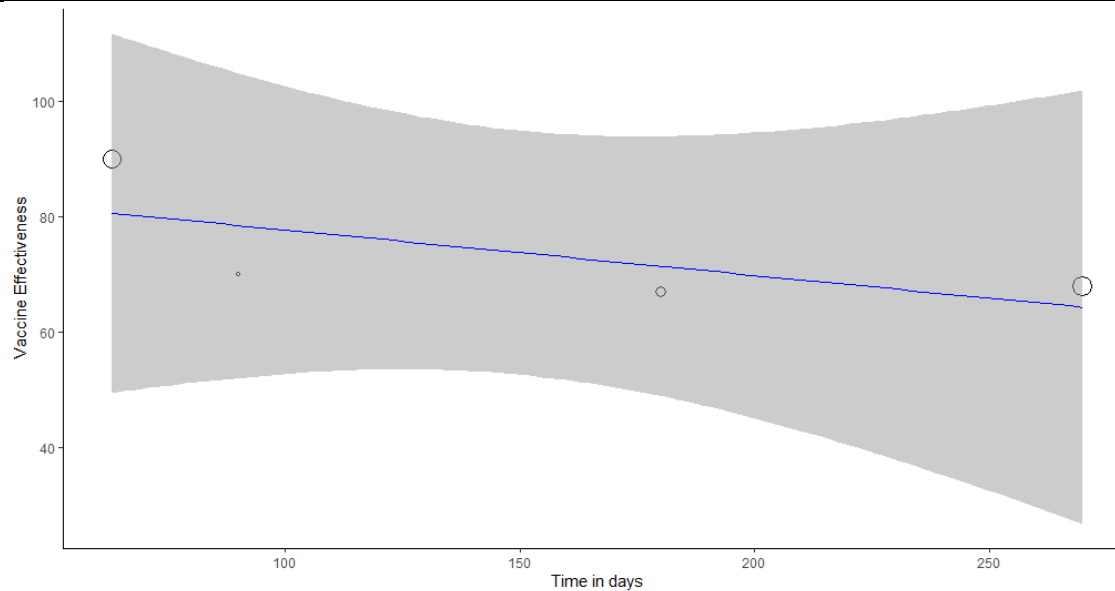

Variable ChAdOx1 nCov-19

Results N/A

Reg Plot N/A

| Variable             | mixture                                                                                                                                                                                                                                                                                                                                                                                                                                                                                                                                                                                                                                                                                                                                                                                                                                                               |         |          |         |         |                      |                              |         |         |                                                                                                                                   |         |                                                                                                                                                                                            |
|----------------------|-----------------------------------------------------------------------------------------------------------------------------------------------------------------------------------------------------------------------------------------------------------------------------------------------------------------------------------------------------------------------------------------------------------------------------------------------------------------------------------------------------------------------------------------------------------------------------------------------------------------------------------------------------------------------------------------------------------------------------------------------------------------------------------------------------------------------------------------------------------------------|---------|----------|---------|---------|----------------------|------------------------------|---------|---------|-----------------------------------------------------------------------------------------------------------------------------------|---------|--------------------------------------------------------------------------------------------------------------------------------------------------------------------------------------------|
| Results              | <p>Number of studies combined: k = 2</p> <table> <thead> <tr> <th>VE</th> <th>95%-CI</th> <th>t</th> <th>p-value</th> </tr> </thead> <tbody> <tr> <td>Random effects model</td> <td>35.9262 [-64.8036; 136.6561]</td> <td>4.53</td> <td>0.1383</td> </tr> </tbody> </table> <p>Quantifying heterogeneity:<br/> <math>\tau^2 = 94.1599</math>; <math>\tau = 9.7036</math><br/> <math>I^2 = 73.6\%</math> [0.0%; 94.0%]; <math>H = 1.94</math> [1.00; 4.10]</p> <p>Test of heterogeneity:<br/> Q d.f. p-value<br/> 3.78 1 0.0518</p>                                                                                                                                                                                                                                                                                                                                    | VE      | 95%-CI   | t       | p-value | Random effects model | 35.9262 [-64.8036; 136.6561] | 4.53    | 0.1383  | $I^2 = 73.6\%$<br>VE estimate (%):<br>35.9262 (-64.8036 to 136.6561), p:<br>0.1383<br>VE reduction estimate (% per month):<br>N/A |         |                                                                                                                                                                                            |
| VE                   | 95%-CI                                                                                                                                                                                                                                                                                                                                                                                                                                                                                                                                                                                                                                                                                                                                                                                                                                                                | t       | p-value  |         |         |                      |                              |         |         |                                                                                                                                   |         |                                                                                                                                                                                            |
| Random effects model | 35.9262 [-64.8036; 136.6561]                                                                                                                                                                                                                                                                                                                                                                                                                                                                                                                                                                                                                                                                                                                                                                                                                                          | 4.53    | 0.1383   |         |         |                      |                              |         |         |                                                                                                                                   |         |                                                                                                                                                                                            |
| Reg Plot             | N/A                                                                                                                                                                                                                                                                                                                                                                                                                                                                                                                                                                                                                                                                                                                                                                                                                                                                   |         |          |         |         |                      |                              |         |         |                                                                                                                                   |         |                                                                                                                                                                                            |
| Variable             | Mixture of mRNA                                                                                                                                                                                                                                                                                                                                                                                                                                                                                                                                                                                                                                                                                                                                                                                                                                                       |         |          |         |         |                      |                              |         |         |                                                                                                                                   |         |                                                                                                                                                                                            |
| Results              | <p>Mixed-Effects Model (k = 8; <math>\tau^2</math> estimator: REML)</p> <table> <thead> <tr> <th>logLik</th> <th>deviance</th> <th>AIC</th> <th>BIC</th> <th>AICc</th> </tr> </thead> <tbody> <tr> <td>-22.0809</td> <td>44.1618</td> <td>50.1618</td> <td>49.5370</td> <td>62.1618</td> </tr> </tbody> </table> <p><math>\tau^2</math> (estimated amount of residual heterogeneity): 59.2136 (SE = 53.6906)<br/> <math>\tau</math> (square root of estimated <math>\tau^2</math> value): 7.6950<br/> <math>I^2</math> (residual heterogeneity / unaccounted variability): 66.06%<br/> <math>H^2</math> (unaccounted variability / sampling variability): 2.95<br/> <math>R^2</math> (amount of heterogeneity accounted for): 38.23%</p> <p>Test for Residual Heterogeneity:<br/> QE(df = 6) = 18.3740, p-val = 0.0054</p> <p>Test of Moderators (coefficient 2):</p> | logLik  | deviance | AIC     | BIC     | AICc                 | -22.0809                     | 44.1618 | 50.1618 | 49.5370                                                                                                                           | 62.1618 | $R^2 = 38.23\%$<br>VE estimate (%):<br>83.9 (62.22 to 105.58), p:<.0001<br>VE reduction estimate (% per month):<br>-2.229 (-5.061 to 0.603), p:0.1023<br><br>VE (%) = 83.8956 - 0.0743 day |
| logLik               | deviance                                                                                                                                                                                                                                                                                                                                                                                                                                                                                                                                                                                                                                                                                                                                                                                                                                                              | AIC     | BIC      | AICc    |         |                      |                              |         |         |                                                                                                                                   |         |                                                                                                                                                                                            |
| -22.0809             | 44.1618                                                                                                                                                                                                                                                                                                                                                                                                                                                                                                                                                                                                                                                                                                                                                                                                                                                               | 50.1618 | 49.5370  | 62.1618 |         |                      |                              |         |         |                                                                                                                                   |         |                                                                                                                                                                                            |

|          |                                                                                                                                                                                                                                                                                                                                                                                                                                                                                                                                          |  |
|----------|------------------------------------------------------------------------------------------------------------------------------------------------------------------------------------------------------------------------------------------------------------------------------------------------------------------------------------------------------------------------------------------------------------------------------------------------------------------------------------------------------------------------------------------|--|
|          | <p>F(df1 = 1, df2 = 6) = 3.7116, p-val = 0.1023</p> <p>Model Results:</p> <pre> estimate   se   tval df  pval  ci.lb  ci.ub intrcpt 83.8956 8.8601 9.4689 6 &lt;.0001 62.2156 105.5755 *** Days    -0.0743 0.0386 -1.9266 6 0.1023 -0.1687 0.0201 </pre>                                                                                                                                                                                                                                                                                 |  |
| Reg Plot | 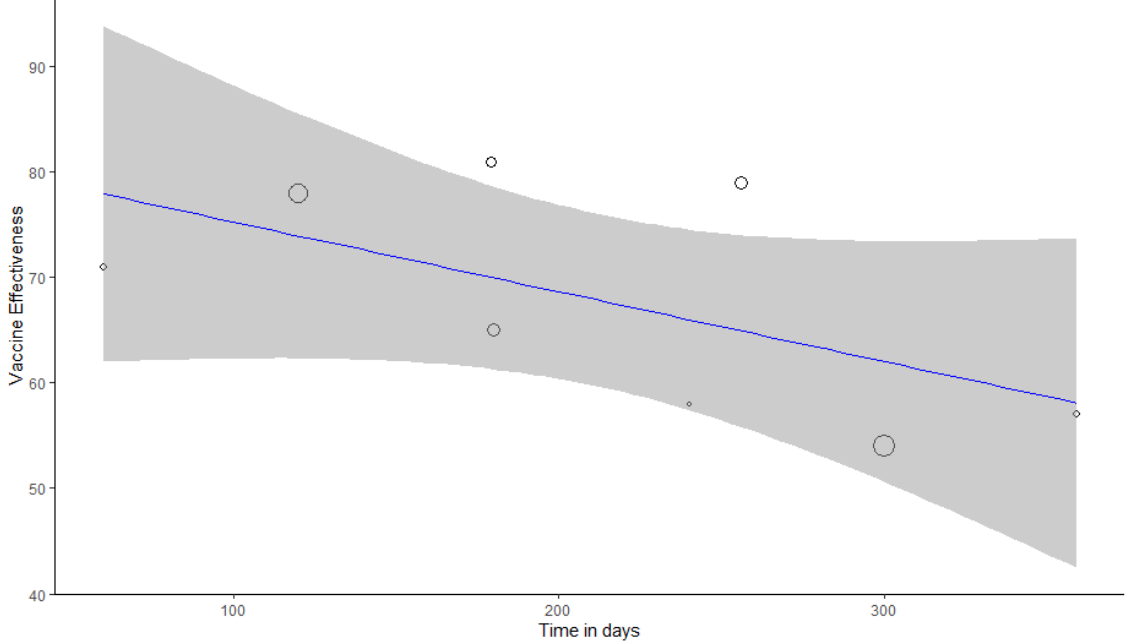 <p>The regression plot displays Vaccine Effectiveness on the y-axis (ranging from 40 to 90) against Time in days on the x-axis (ranging from 0 to 350). A blue line represents the linear regression fit, which shows a slight downward trend. A grey shaded area around the line indicates the confidence interval. Several data points are plotted as circles, with some being larger than others, indicating varying weights or significance.</p> |  |
| Variable | mRNA-1273                                                                                                                                                                                                                                                                                                                                                                                                                                                                                                                                |  |
| Results  | N/A                                                                                                                                                                                                                                                                                                                                                                                                                                                                                                                                      |  |
| Reg Plot | N/A                                                                                                                                                                                                                                                                                                                                                                                                                                                                                                                                      |  |



Cell is denoted as **green** if meta-regression is performed (i.e., if  $k > 3$ ). Cell is denoted as **yellow** if the result is calculated from meta-analysis of two report ( $k = 2$ ). Cell is denoted as **orange** if the result is from a report ( $k = 1$ ) which stays the same as what has been reported by the original study. Cell is denoted as **red** if the result has not been reported by any studies ( $k = 0$ ).

Table S11. Detailed results of VE estimates and VE reduction of full dose for symptomatic infection outcome

| Variable | overall                                                                                                                                                                                                                                                                                                                                                                                                                                                                                                                                                                                                                                                                                                                                                                                                                                                                                                                                                                                                                                                                                                                                                                                                                                                                                                                                                                                                                                 |        |          |    |        |         |         |       |       |  |         |         |        |        |    |        |         |         |     |      |         |        |         |    |        |         |         |     |                                                                                                                                                                                                                                                                     |
|----------|-----------------------------------------------------------------------------------------------------------------------------------------------------------------------------------------------------------------------------------------------------------------------------------------------------------------------------------------------------------------------------------------------------------------------------------------------------------------------------------------------------------------------------------------------------------------------------------------------------------------------------------------------------------------------------------------------------------------------------------------------------------------------------------------------------------------------------------------------------------------------------------------------------------------------------------------------------------------------------------------------------------------------------------------------------------------------------------------------------------------------------------------------------------------------------------------------------------------------------------------------------------------------------------------------------------------------------------------------------------------------------------------------------------------------------------------|--------|----------|----|--------|---------|---------|-------|-------|--|---------|---------|--------|--------|----|--------|---------|---------|-----|------|---------|--------|---------|----|--------|---------|---------|-----|---------------------------------------------------------------------------------------------------------------------------------------------------------------------------------------------------------------------------------------------------------------------|
| Results  | <p>Mixed-Effects Model (k = 59; tau<sup>2</sup> estimator: REML)</p> <p>logLik deviance AIC BIC AICc<br/>                     -255.0308 510.0617 516.0617 522.1908 516.5145</p> <p>tau<sup>2</sup> (estimated amount of residual heterogeneity): 380.0117 (SE = 77.7305)<br/>                     tau (square root of estimated tau<sup>2</sup> value): 19.4939<br/>                     I<sup>2</sup> (residual heterogeneity / unaccounted variability): 99.08%<br/>                     H<sup>2</sup> (unaccounted variability / sampling variability): 108.75<br/>                     R<sup>2</sup> (amount of heterogeneity accounted for): 37.44%</p> <p>Test for Residual Heterogeneity:<br/>                     QE(df = 57) = 3743.4931, p-val &lt; .0001</p> <p>Test of Moderators (coefficient 2):<br/>                     F(df1 = 1, df2 = 57) = 29.5771, p-val &lt; .0001</p> <p>Model Results:</p> <table border="1"> <thead> <tr> <th></th> <th>estimate</th> <th>se</th> <th>tval</th> <th>df</th> <th>pval</th> <th>ci.lb</th> <th>ci.ub</th> <th></th> </tr> </thead> <tbody> <tr> <td>intrcpt</td> <td>58.2061</td> <td>5.9668</td> <td>9.7551</td> <td>57</td> <td>&lt;.0001</td> <td>46.2579</td> <td>70.1543</td> <td>***</td> </tr> <tr> <td>Days</td> <td>-0.1734</td> <td>0.0319</td> <td>-5.4385</td> <td>57</td> <td>&lt;.0001</td> <td>-0.2372</td> <td>-0.1095</td> <td>***</td> </tr> </tbody> </table> |        | estimate | se | tval   | df      | pval    | ci.lb | ci.ub |  | intrcpt | 58.2061 | 5.9668 | 9.7551 | 57 | <.0001 | 46.2579 | 70.1543 | *** | Days | -0.1734 | 0.0319 | -5.4385 | 57 | <.0001 | -0.2372 | -0.1095 | *** | <p>R<sup>2</sup> = 37.44%</p> <p>VE estimate (%):<br/>                     58.21 (46.26 to 70.15), p:&lt;.0001</p> <p>VE reduction estimate (% per month):<br/>                     -5.202 (-7.116 to -3.285), p:&lt;.0001</p> <p>VE (%) = 58.2061 - 0.1734 day</p> |
|          | estimate                                                                                                                                                                                                                                                                                                                                                                                                                                                                                                                                                                                                                                                                                                                                                                                                                                                                                                                                                                                                                                                                                                                                                                                                                                                                                                                                                                                                                                | se     | tval     | df | pval   | ci.lb   | ci.ub   |       |       |  |         |         |        |        |    |        |         |         |     |      |         |        |         |    |        |         |         |     |                                                                                                                                                                                                                                                                     |
| intrcpt  | 58.2061                                                                                                                                                                                                                                                                                                                                                                                                                                                                                                                                                                                                                                                                                                                                                                                                                                                                                                                                                                                                                                                                                                                                                                                                                                                                                                                                                                                                                                 | 5.9668 | 9.7551   | 57 | <.0001 | 46.2579 | 70.1543 | ***   |       |  |         |         |        |        |    |        |         |         |     |      |         |        |         |    |        |         |         |     |                                                                                                                                                                                                                                                                     |
| Days     | -0.1734                                                                                                                                                                                                                                                                                                                                                                                                                                                                                                                                                                                                                                                                                                                                                                                                                                                                                                                                                                                                                                                                                                                                                                                                                                                                                                                                                                                                                                 | 0.0319 | -5.4385  | 57 | <.0001 | -0.2372 | -0.1095 | ***   |       |  |         |         |        |        |    |        |         |         |     |      |         |        |         |    |        |         |         |     |                                                                                                                                                                                                                                                                     |

|          |                                                                                                                                                                                                                                                                                                                                         |                                                                                                                                                                                                   |
|----------|-----------------------------------------------------------------------------------------------------------------------------------------------------------------------------------------------------------------------------------------------------------------------------------------------------------------------------------------|---------------------------------------------------------------------------------------------------------------------------------------------------------------------------------------------------|
| Reg Plot | 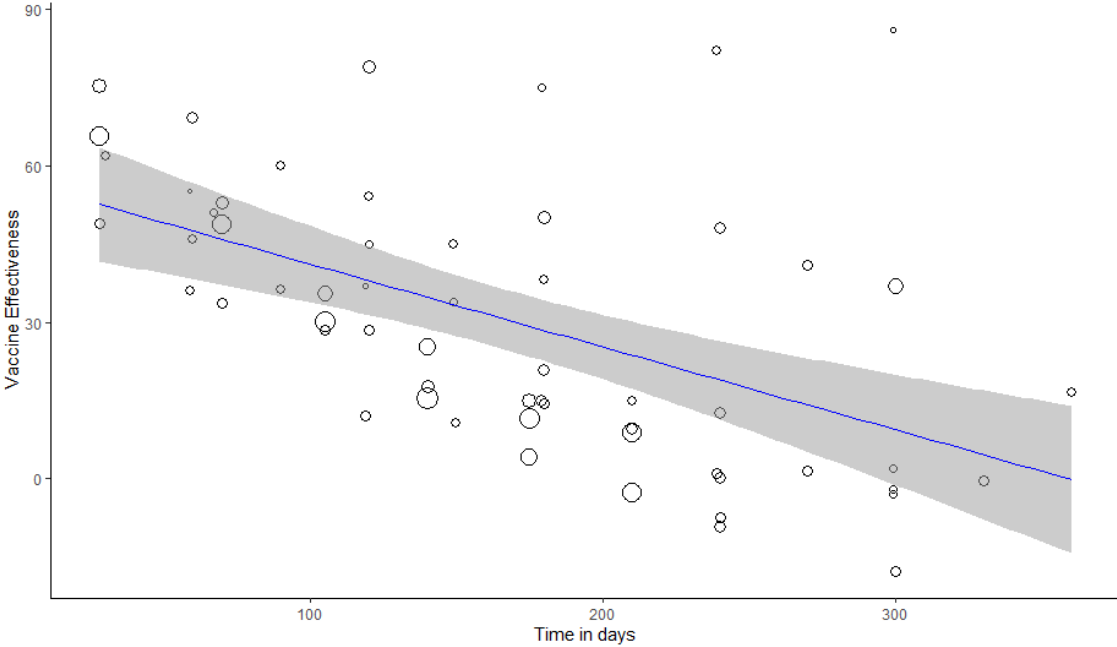                                                                                                                                                                                                                                                      |                                                                                                                                                                                                   |
| Variable | Ad26.COVS.S                                                                                                                                                                                                                                                                                                                             |                                                                                                                                                                                                   |
| Results  | VE estimate (%): 54 (43 to 63)                                                                                                                                                                                                                                                                                                          | VE estimate (%): 54 (43 to 63)<br>VE reduction estimate (% per month): N/A                                                                                                                        |
| Reg Plot | N/A                                                                                                                                                                                                                                                                                                                                     |                                                                                                                                                                                                   |
| Variable | BNT162b2                                                                                                                                                                                                                                                                                                                                |                                                                                                                                                                                                   |
| Results  | Mixed-Effects Model (k = 27; tau <sup>2</sup> estimator: REML)<br><br>logLik   deviance   AIC   BIC   AICc<br>-102.4504   204.9008   210.9008   214.5574   212.0437<br><br>tau <sup>2</sup> (estimated amount of residual heterogeneity):   185.0191 (SE = 60.1933)<br>tau (square root of estimated tau <sup>2</sup> value):   13.6022 | R <sup>2</sup> = 64.37%<br>VE estimate (%):<br>58.38 (46.09 to 70.67), p:<.0001<br>VE reduction estimate (% per month):<br>-5.91 (-7.761 to -4.056), p:<.0001<br><br>VE (%) = 58.3787 - 0.197 day |

|         | <p>I<sup>2</sup> (residual heterogeneity / unaccounted variability): 98.50%<br/> H<sup>2</sup> (unaccounted variability / sampling variability): 66.78<br/> R<sup>2</sup> (amount of heterogeneity accounted for): 64.37%</p> <p>Test for Residual Heterogeneity:<br/> QE(df = 25) = 760.6262, p-val &lt; .0001</p> <p>Test of Moderators (coefficient 2):<br/> F(df1 = 1, df2 = 25) = 43.1650, p-val &lt; .0001</p> <p>Model Results:</p> <table style="width: 100%; border-collapse: collapse;"> <thead> <tr> <th style="text-align: left;"></th> <th style="text-align: right;">estimate</th> <th style="text-align: right;">se</th> <th style="text-align: right;">tval</th> <th style="text-align: right;">df</th> <th style="text-align: right;">pval</th> <th style="text-align: right;">ci.lb</th> <th style="text-align: right;">ci.ub</th> <th style="text-align: right;"></th> </tr> </thead> <tbody> <tr> <td>intrcpt</td> <td style="text-align: right;">58.3787</td> <td style="text-align: right;">5.9674</td> <td style="text-align: right;">9.7829</td> <td style="text-align: right;">25</td> <td style="text-align: right;">&lt;.0001</td> <td style="text-align: right;">46.0886</td> <td style="text-align: right;">70.6687</td> <td style="text-align: right;">***</td> </tr> <tr> <td>Days</td> <td style="text-align: right;">-0.1970</td> <td style="text-align: right;">0.0300</td> <td style="text-align: right;">-6.5700</td> <td style="text-align: right;">25</td> <td style="text-align: right;">&lt;.0001</td> <td style="text-align: right;">-0.2587</td> <td style="text-align: right;">-0.1352</td> <td style="text-align: right;">***</td> </tr> </tbody> </table> |        | estimate | se | tval   | df      | pval    | ci.lb | ci.ub |  | intrcpt | 58.3787 | 5.9674 | 9.7829 | 25 | <.0001 | 46.0886 | 70.6687 | *** | Days | -0.1970 | 0.0300 | -6.5700 | 25 | <.0001 | -0.2587 | -0.1352 | *** |  |
|---------|--------------------------------------------------------------------------------------------------------------------------------------------------------------------------------------------------------------------------------------------------------------------------------------------------------------------------------------------------------------------------------------------------------------------------------------------------------------------------------------------------------------------------------------------------------------------------------------------------------------------------------------------------------------------------------------------------------------------------------------------------------------------------------------------------------------------------------------------------------------------------------------------------------------------------------------------------------------------------------------------------------------------------------------------------------------------------------------------------------------------------------------------------------------------------------------------------------------------------------------------------------------------------------------------------------------------------------------------------------------------------------------------------------------------------------------------------------------------------------------------------------------------------------------------------------------------------------------------------------------------------------------------------------------------------------------------------------|--------|----------|----|--------|---------|---------|-------|-------|--|---------|---------|--------|--------|----|--------|---------|---------|-----|------|---------|--------|---------|----|--------|---------|---------|-----|--|
|         | estimate                                                                                                                                                                                                                                                                                                                                                                                                                                                                                                                                                                                                                                                                                                                                                                                                                                                                                                                                                                                                                                                                                                                                                                                                                                                                                                                                                                                                                                                                                                                                                                                                                                                                                               | se     | tval     | df | pval   | ci.lb   | ci.ub   |       |       |  |         |         |        |        |    |        |         |         |     |      |         |        |         |    |        |         |         |     |  |
| intrcpt | 58.3787                                                                                                                                                                                                                                                                                                                                                                                                                                                                                                                                                                                                                                                                                                                                                                                                                                                                                                                                                                                                                                                                                                                                                                                                                                                                                                                                                                                                                                                                                                                                                                                                                                                                                                | 5.9674 | 9.7829   | 25 | <.0001 | 46.0886 | 70.6687 | ***   |       |  |         |         |        |        |    |        |         |         |     |      |         |        |         |    |        |         |         |     |  |
| Days    | -0.1970                                                                                                                                                                                                                                                                                                                                                                                                                                                                                                                                                                                                                                                                                                                                                                                                                                                                                                                                                                                                                                                                                                                                                                                                                                                                                                                                                                                                                                                                                                                                                                                                                                                                                                | 0.0300 | -6.5700  | 25 | <.0001 | -0.2587 | -0.1352 | ***   |       |  |         |         |        |        |    |        |         |         |     |      |         |        |         |    |        |         |         |     |  |

|          |                                                                                                                                                                                                                                                                                                                                                                                                                                                                                                                                                                                                                                                                                                                     |         |          |         |     |      |         |         |         |         |         |                                                                                                                                                                                                                         |
|----------|---------------------------------------------------------------------------------------------------------------------------------------------------------------------------------------------------------------------------------------------------------------------------------------------------------------------------------------------------------------------------------------------------------------------------------------------------------------------------------------------------------------------------------------------------------------------------------------------------------------------------------------------------------------------------------------------------------------------|---------|----------|---------|-----|------|---------|---------|---------|---------|---------|-------------------------------------------------------------------------------------------------------------------------------------------------------------------------------------------------------------------------|
| Reg Plot |                                                                                                                                                                                                                                                                                                                                                                                                                                                                                                                                                                                                                                                                                                                     |         |          |         |     |      |         |         |         |         |         |                                                                                                                                                                                                                         |
| Variable | ChAdOx1 nCov-19                                                                                                                                                                                                                                                                                                                                                                                                                                                                                                                                                                                                                                                                                                     |         |          |         |     |      |         |         |         |         |         |                                                                                                                                                                                                                         |
| Results  | <p>Mixed-Effects Model (k = 6; tau<sup>2</sup> estimator: REML)</p> <table border="0"> <tr> <td>logLik</td> <td>deviance</td> <td>AIC</td> <td>BIC</td> <td>AICc</td> </tr> <tr> <td>-9.6120</td> <td>19.2241</td> <td>25.2241</td> <td>23.3830</td> <td>49.2241</td> </tr> </table> <p>tau<sup>2</sup> (estimated amount of residual heterogeneity): 2.8159 (SE = 4.7880)<br/> tau (square root of estimated tau<sup>2</sup> value): 1.6781<br/> I<sup>2</sup> (residual heterogeneity / unaccounted variability): 46.23%<br/> H<sup>2</sup> (unaccounted variability / sampling variability): 1.86<br/> R<sup>2</sup> (amount of heterogeneity accounted for): 99.22%</p> <p>Test for Residual Heterogeneity:</p> | logLik  | deviance | AIC     | BIC | AICc | -9.6120 | 19.2241 | 25.2241 | 23.3830 | 49.2241 | <p>R<sup>2</sup> = 99.22%<br/> VE estimate (%):<br/> 56.03 (47.81 to 64.25), p:&lt;.0001<br/> VE reduction estimate (% per month):<br/> -8.532 (-9.978 to -7.089), p:&lt;.0001</p> <p>VE (%) = 56.0307 - 0.2844 day</p> |
| logLik   | deviance                                                                                                                                                                                                                                                                                                                                                                                                                                                                                                                                                                                                                                                                                                            | AIC     | BIC      | AICc    |     |      |         |         |         |         |         |                                                                                                                                                                                                                         |
| -9.6120  | 19.2241                                                                                                                                                                                                                                                                                                                                                                                                                                                                                                                                                                                                                                                                                                             | 25.2241 | 23.3830  | 49.2241 |     |      |         |         |         |         |         |                                                                                                                                                                                                                         |

QE(df = 4) = 6.9972, p-val = 0.1360

Test of Moderators (coefficient 2):  
 F(df1 = 1, df2 = 4) = 269.3835, p-val < .0001

Model Results:

|         | estimate | se     | tval     | df | pval   | ci.lb   | ci.ub   |     |
|---------|----------|--------|----------|----|--------|---------|---------|-----|
| intrcpt | 56.0307  | 2.9616 | 18.9192  | 4  | <.0001 | 47.8081 | 64.2534 | *** |
| Days    | -0.2844  | 0.0173 | -16.4129 | 4  | <.0001 | -0.3326 | -0.2363 | *** |

Reg Plot

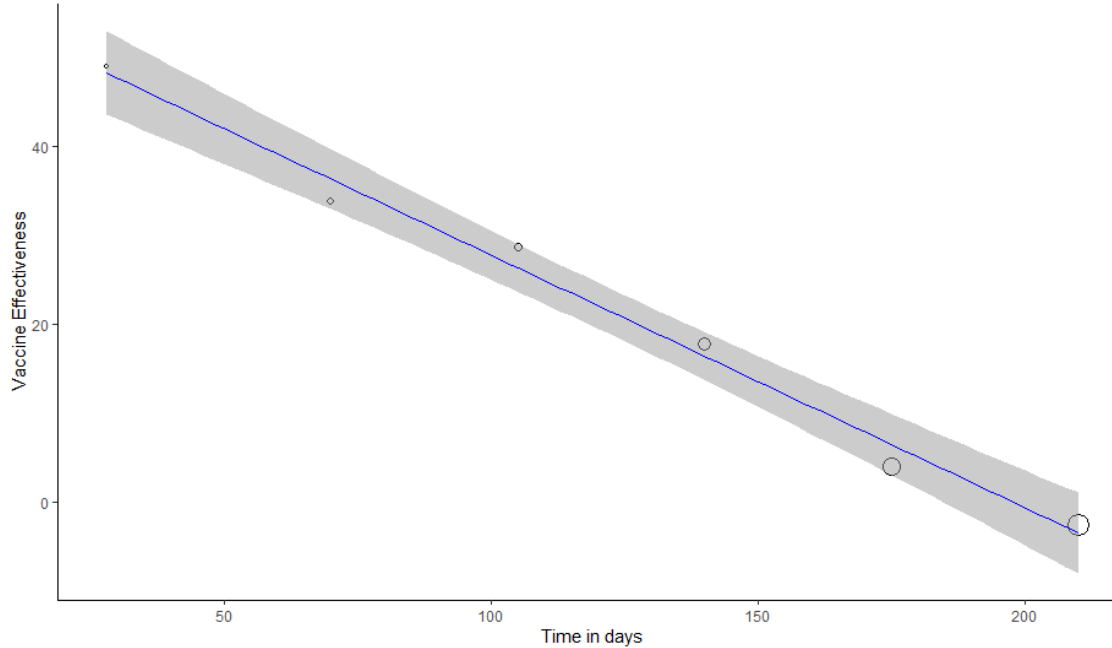

Variable **mixture**

Results N/A

Reg Plot N/A

| Variable | Mixture of mRNA                                                                                                                                                                                                                                                                                                                                                                                                                                                                                                                                                                                                                                                                                                                                                                                                                                                                                                                                                                                                                                                                                                                                                            |         |          |    |        |         |           |       |       |         |         |         |        |    |        |         |           |      |         |        |         |    |        |         |        |                                                                                                                                                                                                      |
|----------|----------------------------------------------------------------------------------------------------------------------------------------------------------------------------------------------------------------------------------------------------------------------------------------------------------------------------------------------------------------------------------------------------------------------------------------------------------------------------------------------------------------------------------------------------------------------------------------------------------------------------------------------------------------------------------------------------------------------------------------------------------------------------------------------------------------------------------------------------------------------------------------------------------------------------------------------------------------------------------------------------------------------------------------------------------------------------------------------------------------------------------------------------------------------------|---------|----------|----|--------|---------|-----------|-------|-------|---------|---------|---------|--------|----|--------|---------|-----------|------|---------|--------|---------|----|--------|---------|--------|------------------------------------------------------------------------------------------------------------------------------------------------------------------------------------------------------|
| Results  | <p>Mixed-Effects Model (k = 15; tau^2 estimator: REML)</p> <p>logLik deviance AIC BIC AICc<br/>-63.2346 126.4692 132.4692 134.1641 135.1359</p> <p>tau^2 (estimated amount of residual heterogeneity): 829.6853 (SE = 371.9081)<br/>tau (square root of estimated tau^2 value): 28.8043<br/>I^2 (residual heterogeneity / unaccounted variability): 97.99%<br/>H^2 (unaccounted variability / sampling variability): 49.87<br/>R^2 (amount of heterogeneity accounted for): 0.00%</p> <p>Test for Residual Heterogeneity:<br/>QE(df = 13) = 477.2669, p-val &lt; .0001</p> <p>Test of Moderators (coefficient 2):<br/>F(df1 = 1, df2 = 13) = 0.4370, p-val = 0.5201</p> <p>Model Results:</p> <table border="1"> <thead> <tr> <th></th> <th>estimate</th> <th>se</th> <th>tval</th> <th>df</th> <th>pval</th> <th>ci.lb</th> <th>ci.ub</th> </tr> </thead> <tbody> <tr> <td>intrcpt</td> <td>55.6158</td> <td>19.2264</td> <td>2.8927</td> <td>13</td> <td>0.0126</td> <td>14.0797</td> <td>97.1519 *</td> </tr> <tr> <td>Days</td> <td>-0.0631</td> <td>0.0954</td> <td>-0.6611</td> <td>13</td> <td>0.5201</td> <td>-0.2693</td> <td>0.1431</td> </tr> </tbody> </table> |         | estimate | se | tval   | df      | pval      | ci.lb | ci.ub | intrcpt | 55.6158 | 19.2264 | 2.8927 | 13 | 0.0126 | 14.0797 | 97.1519 * | Days | -0.0631 | 0.0954 | -0.6611 | 13 | 0.5201 | -0.2693 | 0.1431 | <p>R^2 = 0%</p> <p>VE estimate (%):<br/>55.62 (14.08 to 97.15), p:0.0126</p> <p>VE reduction estimate (% per month):<br/>-1.893 (-8.079 to 4.293), p:0.5201</p> <p>VE (%) = 55.6158 - 0.0631 day</p> |
|          | estimate                                                                                                                                                                                                                                                                                                                                                                                                                                                                                                                                                                                                                                                                                                                                                                                                                                                                                                                                                                                                                                                                                                                                                                   | se      | tval     | df | pval   | ci.lb   | ci.ub     |       |       |         |         |         |        |    |        |         |           |      |         |        |         |    |        |         |        |                                                                                                                                                                                                      |
| intrcpt  | 55.6158                                                                                                                                                                                                                                                                                                                                                                                                                                                                                                                                                                                                                                                                                                                                                                                                                                                                                                                                                                                                                                                                                                                                                                    | 19.2264 | 2.8927   | 13 | 0.0126 | 14.0797 | 97.1519 * |       |       |         |         |         |        |    |        |         |           |      |         |        |         |    |        |         |        |                                                                                                                                                                                                      |
| Days     | -0.0631                                                                                                                                                                                                                                                                                                                                                                                                                                                                                                                                                                                                                                                                                                                                                                                                                                                                                                                                                                                                                                                                                                                                                                    | 0.0954  | -0.6611  | 13 | 0.5201 | -0.2693 | 0.1431    |       |       |         |         |         |        |    |        |         |           |      |         |        |         |    |        |         |        |                                                                                                                                                                                                      |

|          |                                                                                                                                                                                                                                                                                                                                                                                                                                                                                                                                                                                          |                                                                                                                                                                                                                          |
|----------|------------------------------------------------------------------------------------------------------------------------------------------------------------------------------------------------------------------------------------------------------------------------------------------------------------------------------------------------------------------------------------------------------------------------------------------------------------------------------------------------------------------------------------------------------------------------------------------|--------------------------------------------------------------------------------------------------------------------------------------------------------------------------------------------------------------------------|
| Reg Plot |                                                                                                                                                                                                                                                                                                                                                                                                                                                                                                                                                                                          |                                                                                                                                                                                                                          |
| Variable | mRNA-1273                                                                                                                                                                                                                                                                                                                                                                                                                                                                                                                                                                                |                                                                                                                                                                                                                          |
| Results  | <p>Mixed-Effects Model (k = 10; tau<sup>2</sup> estimator: REML)</p> <p>logLik deviance AIC BIC AICc<br/> -28.3074 56.6147 62.6147 62.8531 68.6147</p> <p>tau<sup>2</sup> (estimated amount of residual heterogeneity): 57.4425 (SE = 34.3197)<br/> tau (square root of estimated tau<sup>2</sup> value): 7.5791<br/> I<sup>2</sup> (residual heterogeneity / unaccounted variability): 92.72%<br/> H<sup>2</sup> (unaccounted variability / sampling variability): 13.75<br/> R<sup>2</sup> (amount of heterogeneity accounted for): 89.96%</p> <p>Test for Residual Heterogeneity:</p> | <p>R<sup>2</sup> = 89.96%</p> <p>VE estimate (%):<br/> 76.11 (62.22 to 90), p:&lt;.0001</p> <p>VE reduction estimate (% per month):<br/> -9.558 (-12.09 to -7.029), p:&lt;.0001</p> <p>VE (%) = 76.1092 - 0.3186 day</p> |



QE(df = 8) = 91.5273, p-val < .0001

Test of Moderators (coefficient 2):

F(df1 = 1, df2 = 8) = 75.8955, p-val < .0001

Model Results:

|         | estimate | se     | tval    | df | pval   | ci.lb   | ci.ub   |     |
|---------|----------|--------|---------|----|--------|---------|---------|-----|
| intrcpt | 76.1092  | 6.0235 | 12.6354 | 8  | <.0001 | 62.2191 | 89.9994 | *** |
| Days    | -0.3186  | 0.0366 | -8.7118 | 8  | <.0001 | -0.4030 | -0.2343 | *** |

Reg Plot

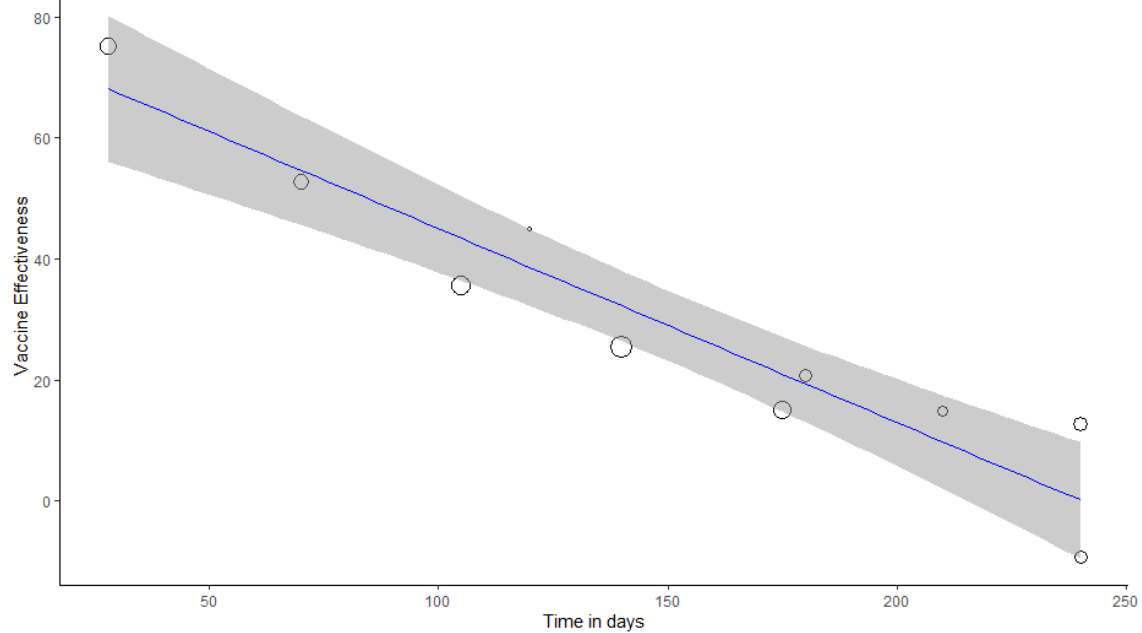

Cell is denoted as **green** if meta-regression is performed (i.e., if  $k > 3$ ). Cell is denoted as **orange** if the result is from a report ( $k = 1$ ) which stays the same as what has been reported by the original study. Cell is denoted as **red** if the result has not been reported by any studies ( $k = 0$ ).

## S.9. Detailed Results of VE Estimates and VE Reduction of Booster Dose

Table S12. Detailed results of VE estimates and VE reduction of booster dose for any infection outcome

| Variable | Overall                                                                                                                                                                                                                                                                                                                                                                                                                                                                                                                                                                                                                                                                                                                                                                                                                                                                                                                                                                                                                                                                                                                                                                                                                                                                                                                                                                                                             | Report |          |    |        |         |         |       |       |  |         |         |        |         |    |        |         |         |     |      |         |        |         |    |        |         |        |  |                                                                                                                                                                                                                                                            |
|----------|---------------------------------------------------------------------------------------------------------------------------------------------------------------------------------------------------------------------------------------------------------------------------------------------------------------------------------------------------------------------------------------------------------------------------------------------------------------------------------------------------------------------------------------------------------------------------------------------------------------------------------------------------------------------------------------------------------------------------------------------------------------------------------------------------------------------------------------------------------------------------------------------------------------------------------------------------------------------------------------------------------------------------------------------------------------------------------------------------------------------------------------------------------------------------------------------------------------------------------------------------------------------------------------------------------------------------------------------------------------------------------------------------------------------|--------|----------|----|--------|---------|---------|-------|-------|--|---------|---------|--------|---------|----|--------|---------|---------|-----|------|---------|--------|---------|----|--------|---------|--------|--|------------------------------------------------------------------------------------------------------------------------------------------------------------------------------------------------------------------------------------------------------------|
| Results  | <p>Mixed-Effects Model (k = 52; tau<sup>2</sup> estimator: REML)</p> <p>logLik deviance AIC BIC AICc<br/>                     -230.1926 460.3852 466.3852 472.1213 466.9070</p> <p>tau<sup>2</sup> (estimated amount of residual heterogeneity): 542.6083 (SE = 115.2483)<br/>                     tau (square root of estimated tau<sup>2</sup> value): 23.2940<br/>                     I<sup>2</sup> (residual heterogeneity / unaccounted variability): 99.86%<br/>                     H<sup>2</sup> (unaccounted variability / sampling variability): 710.84<br/>                     R<sup>2</sup> (amount of heterogeneity accounted for): 1.18%</p> <p>Test for Residual Heterogeneity:<br/>                     QE(df = 50) = 8970.2627, p-val &lt; .0001</p> <p>Test of Moderators (coefficient 2):<br/>                     F(df1 = 1, df2 = 50) = 2.7243, p-val = 0.1051</p> <p>Model Results:</p> <table> <thead> <tr> <th></th> <th>estimate</th> <th>se</th> <th>tval</th> <th>df</th> <th>pval</th> <th>ci.lb</th> <th>ci.ub</th> <th></th> </tr> </thead> <tbody> <tr> <td>intrcpt</td> <td>66.0370</td> <td>5.3345</td> <td>12.3792</td> <td>50</td> <td>&lt;.0001</td> <td>55.3223</td> <td>76.7517</td> <td>***</td> </tr> <tr> <td>Days</td> <td>-0.0769</td> <td>0.0466</td> <td>-1.6505</td> <td>50</td> <td>0.1051</td> <td>-0.1706</td> <td>0.0167</td> <td></td> </tr> </tbody> </table> |        | estimate | se | tval   | df      | pval    | ci.lb | ci.ub |  | intrcpt | 66.0370 | 5.3345 | 12.3792 | 50 | <.0001 | 55.3223 | 76.7517 | *** | Days | -0.0769 | 0.0466 | -1.6505 | 50 | 0.1051 | -0.1706 | 0.0167 |  | <p>R<sup>2</sup> = 0%</p> <p>VE estimate (%):<br/>                     66.04 (55.32 to 76.75), p:&lt;.0001</p> <p>VE reduction estimate (% per month):<br/>                     -2.307 (-5.118 to 0.501), p:0.1051</p> <p>VE (%) = 66.037 - 0.0769 day</p> |
|          | estimate                                                                                                                                                                                                                                                                                                                                                                                                                                                                                                                                                                                                                                                                                                                                                                                                                                                                                                                                                                                                                                                                                                                                                                                                                                                                                                                                                                                                            | se     | tval     | df | pval   | ci.lb   | ci.ub   |       |       |  |         |         |        |         |    |        |         |         |     |      |         |        |         |    |        |         |        |  |                                                                                                                                                                                                                                                            |
| intrcpt  | 66.0370                                                                                                                                                                                                                                                                                                                                                                                                                                                                                                                                                                                                                                                                                                                                                                                                                                                                                                                                                                                                                                                                                                                                                                                                                                                                                                                                                                                                             | 5.3345 | 12.3792  | 50 | <.0001 | 55.3223 | 76.7517 | ***   |       |  |         |         |        |         |    |        |         |         |     |      |         |        |         |    |        |         |        |  |                                                                                                                                                                                                                                                            |
| Days     | -0.0769                                                                                                                                                                                                                                                                                                                                                                                                                                                                                                                                                                                                                                                                                                                                                                                                                                                                                                                                                                                                                                                                                                                                                                                                                                                                                                                                                                                                             | 0.0466 | -1.6505  | 50 | 0.1051 | -0.1706 | 0.0167  |       |       |  |         |         |        |         |    |        |         |         |     |      |         |        |         |    |        |         |        |  |                                                                                                                                                                                                                                                            |

|          |                                                                                                                                                                                                                                                                                                                                                                                                                                                                                                                                                                                                                                                                                                                                                |                                                                                                                                                                                                                      |
|----------|------------------------------------------------------------------------------------------------------------------------------------------------------------------------------------------------------------------------------------------------------------------------------------------------------------------------------------------------------------------------------------------------------------------------------------------------------------------------------------------------------------------------------------------------------------------------------------------------------------------------------------------------------------------------------------------------------------------------------------------------|----------------------------------------------------------------------------------------------------------------------------------------------------------------------------------------------------------------------|
| Reg Plot | 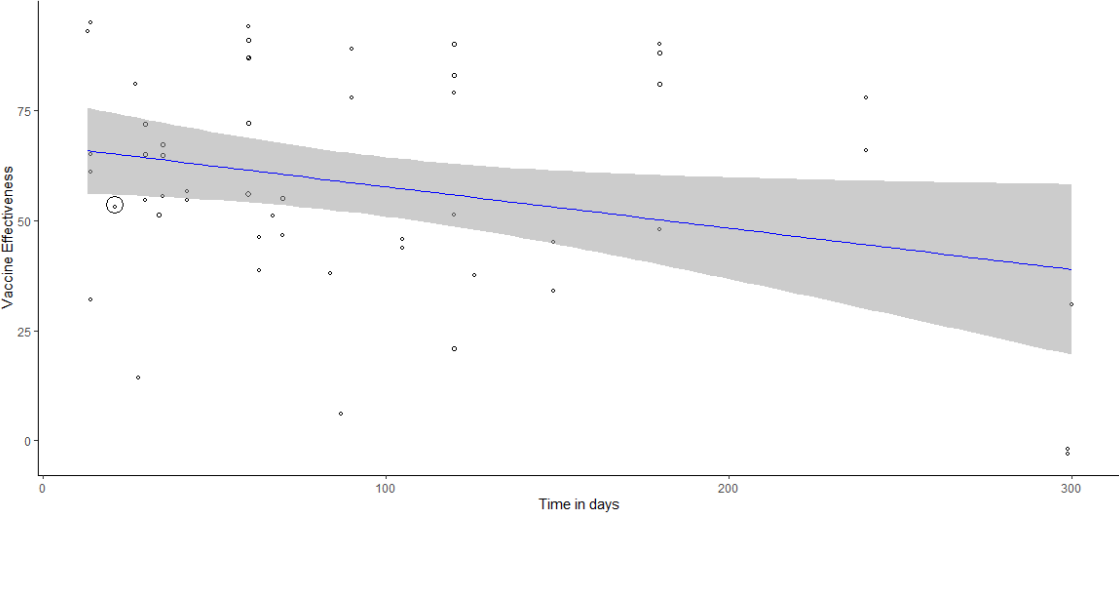                                                                                                                                                                                                                                                                                                                                                                                                                                                                                                                                                                                                                                                             |                                                                                                                                                                                                                      |
| Variable | Ad26.COVS.S                                                                                                                                                                                                                                                                                                                                                                                                                                                                                                                                                                                                                                                                                                                                    |                                                                                                                                                                                                                      |
| Results  | <p>Mixed-Effects Model (k = 5; tau<sup>2</sup> estimator: REML)</p> <p>logLik deviance    AIC    BIC    AICc<br/> -15.0520 30.1039 36.1039 33.3997 60.1039</p> <p>tau<sup>2</sup> (estimated amount of residual heterogeneity): 1254.1640 (SE = 1086.8963)<br/> tau (square root of estimated tau<sup>2</sup> value): 35.4142<br/> I<sup>2</sup> (residual heterogeneity / unaccounted variability): 97.44%<br/> H<sup>2</sup> (unaccounted variability / sampling variability): 39.13<br/> R<sup>2</sup> (amount of heterogeneity accounted for): 11.79%</p> <p>Test for Residual Heterogeneity:<br/> QE(df = 3) = 55.1021, p-val &lt; .0001</p> <p>Test of Moderators (coefficient 2):<br/> F(df1 = 1, df2 = 3) = 1.5795, p-val = 0.2978</p> | <p>R<sup>2</sup> = 11.79%<br/> VE estimate (%):<br/> 69.16 (-13.52 to 151.85), p:0.0762<br/> VE reduction estimate (% per month):<br/> -22.359 (-78.981 to 34.26), p:0.2978</p> <p>VE (%) = 69.1648 - 0.7453 day</p> |

|          |                                                                                                                                                                                                                                                                                                                                                                                                                                                                                                                                                                                                         |                                                                                                                                                                                                                    |
|----------|---------------------------------------------------------------------------------------------------------------------------------------------------------------------------------------------------------------------------------------------------------------------------------------------------------------------------------------------------------------------------------------------------------------------------------------------------------------------------------------------------------------------------------------------------------------------------------------------------------|--------------------------------------------------------------------------------------------------------------------------------------------------------------------------------------------------------------------|
|          | <p>Model Results:</p> <pre> estimate   se   tval df  pval   ci.lb   ci.ub intrcpt 69.1648 25.9815 2.6621 3 0.0762 -13.5200 151.8496 . Days    -0.7453 0.5931 -1.2568 3 0.2978 -2.6327 1.1420 </pre>                                                                                                                                                                                                                                                                                                                                                                                                     |                                                                                                                                                                                                                    |
| Reg Plot | 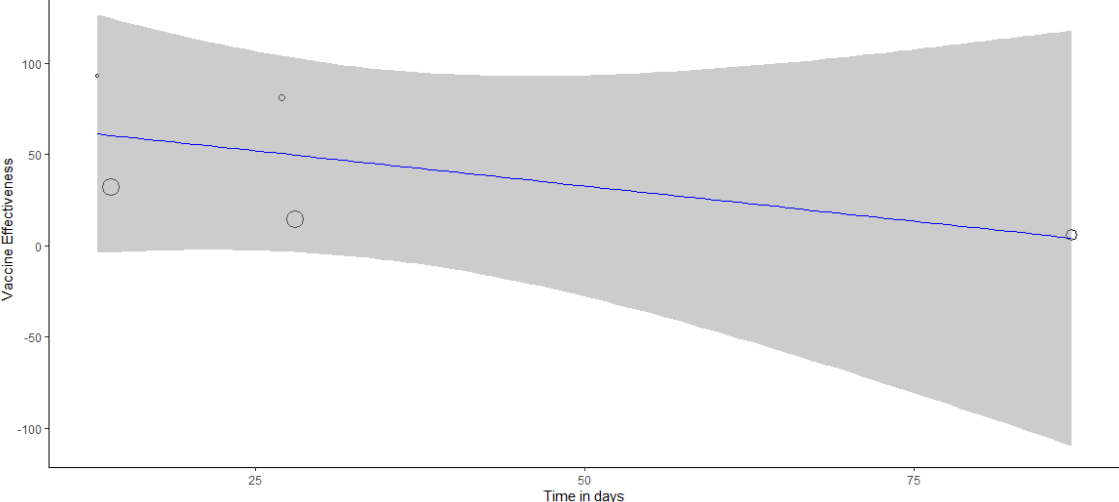                                                                                                                                                                                                                                                                                                                                                                                                                                                                                                                      |                                                                                                                                                                                                                    |
| Variable | BNT162b2                                                                                                                                                                                                                                                                                                                                                                                                                                                                                                                                                                                                |                                                                                                                                                                                                                    |
| Results  | <p>Mixed-Effects Model (k = 20; tau<sup>2</sup> estimator: REML)</p> <pre> logLik deviance   AIC   BIC   AICc -78.0335 156.0670 162.0670 164.7381 163.7812 </pre> <p>tau<sup>2</sup> (estimated amount of residual heterogeneity): 282.9738 (SE = 107.4060)<br/> tau (square root of estimated tau<sup>2</sup> value): 16.8218<br/> I<sup>2</sup> (residual heterogeneity / unaccounted variability): 99.63%<br/> H<sup>2</sup> (unaccounted variability / sampling variability): 270.53<br/> R<sup>2</sup> (amount of heterogeneity accounted for): 36.53%</p> <p>Test for Residual Heterogeneity:</p> | <p>R<sup>2</sup> = 36.53%<br/> VE estimate (%):<br/> 69.79 (54.94 to 84.65), p:&lt;.0001<br/> VE reduction estimate (% per month):<br/> -5.442 (-8.988 to -1.893), p:0.0047<br/> VE (%) = 69.7933 - 0.1814 day</p> |

|                      | <p>QE(df = 18) = 1907.8760, p-val &lt; .0001</p> <p>Test of Moderators (coefficient 2):<br/> F(df1 = 1, df2 = 18) = 10.3822, p-val = 0.0047</p> <p>Model Results:</p> <table border="1"> <thead> <tr> <th></th> <th>estimate</th> <th>se</th> <th>tval</th> <th>df</th> <th>pval</th> <th>ci.lb</th> <th>ci.ub</th> <th></th> </tr> </thead> <tbody> <tr> <td>intrcpt</td> <td>69.7933</td> <td>7.0722</td> <td>9.8687</td> <td>18</td> <td>&lt;.0001</td> <td>54.9352</td> <td>84.6513</td> <td>***</td> </tr> <tr> <td>Days</td> <td>-0.1814</td> <td>0.0563</td> <td>-3.2221</td> <td>18</td> <td>0.0047</td> <td>-0.2996</td> <td>-0.0631</td> <td>**</td> </tr> </tbody> </table> |                     | estimate | se      | tval   | df      | pval                 | ci.lb   | ci.ub               |       | intrcpt | 69.7933                                                                                                                                                      | 7.0722 | 9.8687 | 18 | <.0001 | 54.9352 | 84.6513 | *** | Days | -0.1814 | 0.0563 | -3.2221 | 18 | 0.0047 | -0.2996 | -0.0631 | ** |  |
|----------------------|----------------------------------------------------------------------------------------------------------------------------------------------------------------------------------------------------------------------------------------------------------------------------------------------------------------------------------------------------------------------------------------------------------------------------------------------------------------------------------------------------------------------------------------------------------------------------------------------------------------------------------------------------------------------------------------|---------------------|----------|---------|--------|---------|----------------------|---------|---------------------|-------|---------|--------------------------------------------------------------------------------------------------------------------------------------------------------------|--------|--------|----|--------|---------|---------|-----|------|---------|--------|---------|----|--------|---------|---------|----|--|
|                      | estimate                                                                                                                                                                                                                                                                                                                                                                                                                                                                                                                                                                                                                                                                               | se                  | tval     | df      | pval   | ci.lb   | ci.ub                |         |                     |       |         |                                                                                                                                                              |        |        |    |        |         |         |     |      |         |        |         |    |        |         |         |    |  |
| intrcpt              | 69.7933                                                                                                                                                                                                                                                                                                                                                                                                                                                                                                                                                                                                                                                                                | 7.0722              | 9.8687   | 18      | <.0001 | 54.9352 | 84.6513              | ***     |                     |       |         |                                                                                                                                                              |        |        |    |        |         |         |     |      |         |        |         |    |        |         |         |    |  |
| Days                 | -0.1814                                                                                                                                                                                                                                                                                                                                                                                                                                                                                                                                                                                                                                                                                | 0.0563              | -3.2221  | 18      | 0.0047 | -0.2996 | -0.0631              | **      |                     |       |         |                                                                                                                                                              |        |        |    |        |         |         |     |      |         |        |         |    |        |         |         |    |  |
| Reg Plot             |                                                                                                                                                                                                                                                                                                                                                                                                                                                                                                                                                                                                                                                                                        |                     |          |         |        |         |                      |         |                     |       |         |                                                                                                                                                              |        |        |    |        |         |         |     |      |         |        |         |    |        |         |         |    |  |
| Variable             | ChAdOx1                                                                                                                                                                                                                                                                                                                                                                                                                                                                                                                                                                                                                                                                                |                     |          |         |        |         |                      |         |                     |       |         |                                                                                                                                                              |        |        |    |        |         |         |     |      |         |        |         |    |        |         |         |    |  |
| Results              | <p>Number of studies combined: k = 2</p> <table border="1"> <thead> <tr> <th></th> <th>VE</th> <th>95%-CI</th> <th>t</th> <th>p-value</th> </tr> </thead> <tbody> <tr> <td>Random effects model</td> <td>51.4480</td> <td>[-4.9677; 107.8637]</td> <td>11.59</td> <td>0.0548</td> </tr> </tbody> </table> <p>Quantifying heterogeneity:<br/> tau<sup>2</sup> = 9.6042; tau = 3.0991; I<sup>2</sup> = 24.2%; H = 1.15</p>                                                                                                                                                                                                                                                               |                     | VE       | 95%-CI  | t      | p-value | Random effects model | 51.4480 | [-4.9677; 107.8637] | 11.59 | 0.0548  | <p>I<sup>2</sup> = 24.2%</p> <p>VE estimate (%):<br/> 51.4480 (-4.9677 to 107.8637), p:<br/> 0.0548</p> <p>VE reduction estimate (% per month):<br/> N/A</p> |        |        |    |        |         |         |     |      |         |        |         |    |        |         |         |    |  |
|                      | VE                                                                                                                                                                                                                                                                                                                                                                                                                                                                                                                                                                                                                                                                                     | 95%-CI              | t        | p-value |        |         |                      |         |                     |       |         |                                                                                                                                                              |        |        |    |        |         |         |     |      |         |        |         |    |        |         |         |    |  |
| Random effects model | 51.4480                                                                                                                                                                                                                                                                                                                                                                                                                                                                                                                                                                                                                                                                                | [-4.9677; 107.8637] | 11.59    | 0.0548  |        |         |                      |         |                     |       |         |                                                                                                                                                              |        |        |    |        |         |         |     |      |         |        |         |    |        |         |         |    |  |

|          | Test of heterogeneity:<br>Q d.f. p-value<br>1.32 1 0.2506                                                                                                                                                                                                                                                                                                                                                                                                                                                                                                                                                                                                                                                                                                                                                                                                                                                                                                                                                                                                                                                                                                |         |          |    |        |          |          |       |       |         |         |         |        |   |        |          |          |      |        |        |        |   |        |         |        |                                                                                                                                                                                        |
|----------|----------------------------------------------------------------------------------------------------------------------------------------------------------------------------------------------------------------------------------------------------------------------------------------------------------------------------------------------------------------------------------------------------------------------------------------------------------------------------------------------------------------------------------------------------------------------------------------------------------------------------------------------------------------------------------------------------------------------------------------------------------------------------------------------------------------------------------------------------------------------------------------------------------------------------------------------------------------------------------------------------------------------------------------------------------------------------------------------------------------------------------------------------------|---------|----------|----|--------|----------|----------|-------|-------|---------|---------|---------|--------|---|--------|----------|----------|------|--------|--------|--------|---|--------|---------|--------|----------------------------------------------------------------------------------------------------------------------------------------------------------------------------------------|
| Reg Plot | N/A                                                                                                                                                                                                                                                                                                                                                                                                                                                                                                                                                                                                                                                                                                                                                                                                                                                                                                                                                                                                                                                                                                                                                      |         |          |    |        |          |          |       |       |         |         |         |        |   |        |          |          |      |        |        |        |   |        |         |        |                                                                                                                                                                                        |
| Variable | Mixture                                                                                                                                                                                                                                                                                                                                                                                                                                                                                                                                                                                                                                                                                                                                                                                                                                                                                                                                                                                                                                                                                                                                                  |         |          |    |        |          |          |       |       |         |         |         |        |   |        |          |          |      |        |        |        |   |        |         |        |                                                                                                                                                                                        |
| Results  | Mixed-Effects Model (k = 7; tau^2 estimator: REML)<br><br>logLik deviance AIC BIC AICc<br>-23.6424 47.2849 53.2849 52.1132 77.2849<br><br>tau^2 (estimated amount of residual heterogeneity): 744.5094 (SE = 474.1033)<br>tau (square root of estimated tau^2 value): 27.2857<br>I^2 (residual heterogeneity / unaccounted variability): 99.94%<br>H^2 (unaccounted variability / sampling variability): 1581.11<br>R^2 (amount of heterogeneity accounted for): 0.00%<br><br>Test for Residual Heterogeneity:<br>QE(df = 5) = 3493.4528, p-val < .0001<br><br>Test of Moderators (coefficient 2):<br>F(df1 = 1, df2 = 5) = 0.0968, p-val = 0.7683<br><br>Model Results:<br><br><table border="1"> <thead> <tr> <th></th> <th>estimate</th> <th>se</th> <th>tval</th> <th>df</th> <th>pval</th> <th>ci.lb</th> <th>ci.ub</th> </tr> </thead> <tbody> <tr> <td>intrcpt</td> <td>58.2918</td> <td>28.7750</td> <td>2.0258</td> <td>5</td> <td>0.0986</td> <td>-15.6768</td> <td>132.2603</td> </tr> <tr> <td>Days</td> <td>0.0921</td> <td>0.2960</td> <td>0.3111</td> <td>5</td> <td>0.7683</td> <td>-0.6689</td> <td>0.8531</td> </tr> </tbody> </table> |         | estimate | se | tval   | df       | pval     | ci.lb | ci.ub | intrcpt | 58.2918 | 28.7750 | 2.0258 | 5 | 0.0986 | -15.6768 | 132.2603 | Days | 0.0921 | 0.2960 | 0.3111 | 5 | 0.7683 | -0.6689 | 0.8531 | R^2 = 0%<br>VE estimate (%):<br>58.29 (-15.68 to 132.26), p:0.0986<br>VE reduction estimate (% per month):<br>2.763 (-20.067 to 25.593), p:0.7683<br><br>VE (%) = 58.2918 + 0.0921 day |
|          | estimate                                                                                                                                                                                                                                                                                                                                                                                                                                                                                                                                                                                                                                                                                                                                                                                                                                                                                                                                                                                                                                                                                                                                                 | se      | tval     | df | pval   | ci.lb    | ci.ub    |       |       |         |         |         |        |   |        |          |          |      |        |        |        |   |        |         |        |                                                                                                                                                                                        |
| intrcpt  | 58.2918                                                                                                                                                                                                                                                                                                                                                                                                                                                                                                                                                                                                                                                                                                                                                                                                                                                                                                                                                                                                                                                                                                                                                  | 28.7750 | 2.0258   | 5  | 0.0986 | -15.6768 | 132.2603 |       |       |         |         |         |        |   |        |          |          |      |        |        |        |   |        |         |        |                                                                                                                                                                                        |
| Days     | 0.0921                                                                                                                                                                                                                                                                                                                                                                                                                                                                                                                                                                                                                                                                                                                                                                                                                                                                                                                                                                                                                                                                                                                                                   | 0.2960  | 0.3111   | 5  | 0.7683 | -0.6689  | 0.8531   |       |       |         |         |         |        |   |        |          |          |      |        |        |        |   |        |         |        |                                                                                                                                                                                        |

|          |                                                                                                                                                                                                                                                                                                                                                                                                                                                                                                                                                                                                                                                                                                                                                                                                                                                                                           |         |          |         |     |      |          |         |         |         |         |                                                                                                                                                                                                                |
|----------|-------------------------------------------------------------------------------------------------------------------------------------------------------------------------------------------------------------------------------------------------------------------------------------------------------------------------------------------------------------------------------------------------------------------------------------------------------------------------------------------------------------------------------------------------------------------------------------------------------------------------------------------------------------------------------------------------------------------------------------------------------------------------------------------------------------------------------------------------------------------------------------------|---------|----------|---------|-----|------|----------|---------|---------|---------|---------|----------------------------------------------------------------------------------------------------------------------------------------------------------------------------------------------------------------|
| Reg Plot | 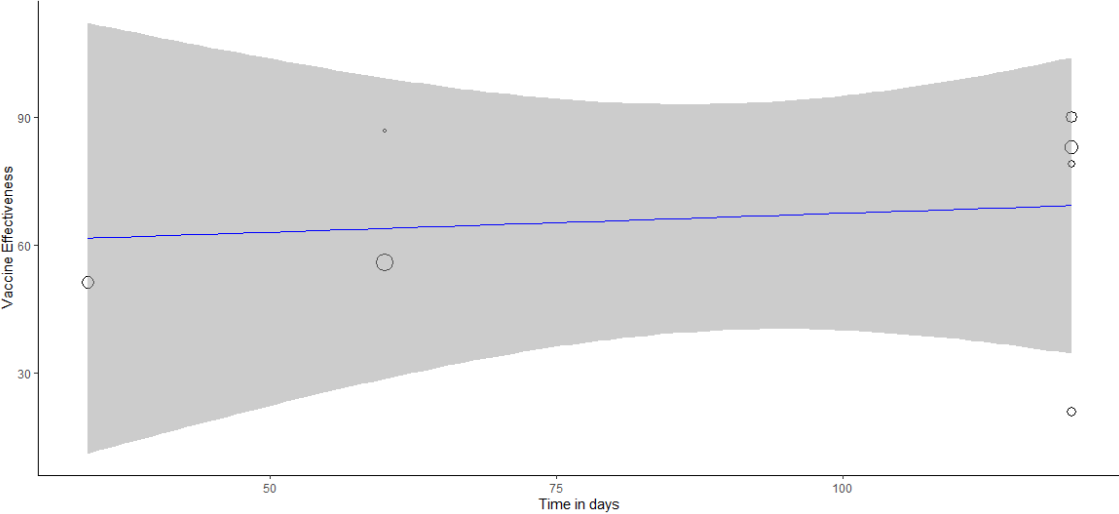                                                                                                                                                                                                                                                                                                                                                                                                                                                                                                                                                                                                                                                                                                                                                                                                        |         |          |         |     |      |          |         |         |         |         |                                                                                                                                                                                                                |
| Variable | Mixture of mRNA                                                                                                                                                                                                                                                                                                                                                                                                                                                                                                                                                                                                                                                                                                                                                                                                                                                                           |         |          |         |     |      |          |         |         |         |         |                                                                                                                                                                                                                |
| Results  | <p>Mixed-Effects Model (k = 10; tau<sup>2</sup> estimator: REML)</p> <table border="0"> <tr> <td>logLik</td> <td>deviance</td> <td>AIC</td> <td>BIC</td> <td>AICc</td> </tr> <tr> <td>-32.5356</td> <td>65.0712</td> <td>71.0712</td> <td>71.3095</td> <td>77.0712</td> </tr> </table> <p>tau<sup>2</sup> (estimated amount of residual heterogeneity): 148.4871 (SE = 81.8958)<br/> tau (square root of estimated tau<sup>2</sup> value): 12.1855<br/> I<sup>2</sup> (residual heterogeneity / unaccounted variability): 98.22%<br/> H<sup>2</sup> (unaccounted variability / sampling variability): 56.20<br/> R<sup>2</sup> (amount of heterogeneity accounted for): 0.00%</p> <p>Test for Residual Heterogeneity:<br/> QE(df = 8) = 215.9954, p-val &lt; .0001</p> <p>Test of Moderators (coefficient 2):<br/> F(df1 = 1, df2 = 8) = 1.3832, p-val = 0.2734</p> <p>Model Results:</p> | logLik  | deviance | AIC     | BIC | AICc | -32.5356 | 65.0712 | 71.0712 | 71.3095 | 77.0712 | <p>R<sup>2</sup> = 0%<br/> VE estimate (%):<br/> 88.23 (72.01 to 104.46), p:&lt;.0001<br/> VE reduction estimate (% per month):<br/> -1.68 (-4.971 to 1.614), p:0.2734</p> <p>VE (%) = 88.2341 - 0.056 day</p> |
| logLik   | deviance                                                                                                                                                                                                                                                                                                                                                                                                                                                                                                                                                                                                                                                                                                                                                                                                                                                                                  | AIC     | BIC      | AICc    |     |      |          |         |         |         |         |                                                                                                                                                                                                                |
| -32.5356 | 65.0712                                                                                                                                                                                                                                                                                                                                                                                                                                                                                                                                                                                                                                                                                                                                                                                                                                                                                   | 71.0712 | 71.3095  | 77.0712 |     |      |          |         |         |         |         |                                                                                                                                                                                                                |



|          |                                                                                                                                                                                                                                                                                                                                                                                                                                                                                                                                                                                                                                            |                                                                                                                                                                                                                     |
|----------|--------------------------------------------------------------------------------------------------------------------------------------------------------------------------------------------------------------------------------------------------------------------------------------------------------------------------------------------------------------------------------------------------------------------------------------------------------------------------------------------------------------------------------------------------------------------------------------------------------------------------------------------|---------------------------------------------------------------------------------------------------------------------------------------------------------------------------------------------------------------------|
|          | <pre> estimate  se  tval df  pval  ci.lb  ci.ub intrcpt  88.2341  7.0370  12.5386  8 &lt;.0001  72.0068  104.4614 *** Days     -0.0560  0.0476  -1.1761  8  0.2734  -0.1657  0.0538 </pre>                                                                                                                                                                                                                                                                                                                                                                                                                                                 |                                                                                                                                                                                                                     |
| Reg Plot |                                                                                                                                                                                                                                                                                                                                                                                                                                                                                                                                                                                                                                            |                                                                                                                                                                                                                     |
| Variable | mRNA-1273                                                                                                                                                                                                                                                                                                                                                                                                                                                                                                                                                                                                                                  |                                                                                                                                                                                                                     |
| Results  | <p>Mixed-Effects Model (k = 8; tau<sup>2</sup> estimator: REML)</p> <pre> logLik deviance  AIC  BIC  AICc -22.9728  45.9455  51.9455  51.3208  63.9455 </pre> <p>tau<sup>2</sup> (estimated amount of residual heterogeneity): 94.7994 (SE = 65.0811)<br/> tau (square root of estimated tau<sup>2</sup> value): 9.7365<br/> I<sup>2</sup> (residual heterogeneity / unaccounted variability): 95.56%<br/> H<sup>2</sup> (unaccounted variability / sampling variability): 22.54<br/> R<sup>2</sup> (amount of heterogeneity accounted for): 1.43%</p> <p>Test for Residual Heterogeneity:<br/> QE(df = 6) = 78.7042, p-val &lt; .0001</p> | <p>R<sup>2</sup> = 1.43%<br/> VE estimate (%):<br/> 66.54 (49.43 to 83.65), p:&lt;.0001<br/> VE reduction estimate (% per month):<br/> -3.717 (-12.579 to 5.145), p:0.3444</p> <p>VE (%) = 66.5414 - 0.1239 day</p> |

|          | <p>Test of Moderators (coefficient 2):<br/> <math>F(df1 = 1, df2 = 6) = 1.0529, p\text{-val} = 0.3444</math></p> <p>Model Results:</p> <table border="1"> <thead> <tr> <th></th> <th>estimate</th> <th>se</th> <th>tval</th> <th>df</th> <th>pval</th> <th>ci.lb</th> <th>ci.ub</th> <th></th> </tr> </thead> <tbody> <tr> <td>intrcpt</td> <td>66.5414</td> <td>6.9927</td> <td>9.5158</td> <td>6</td> <td>&lt;.0001</td> <td>49.4308</td> <td>83.6519</td> <td>***</td> </tr> <tr> <td>Days</td> <td>-0.1239</td> <td>0.1207</td> <td>-1.0261</td> <td>6</td> <td>0.3444</td> <td>-0.4193</td> <td>0.1715</td> <td></td> </tr> </tbody> </table> |        | estimate | se | tval   | df      | pval    | ci.lb | ci.ub |  | intrcpt | 66.5414 | 6.9927 | 9.5158 | 6 | <.0001 | 49.4308 | 83.6519 | *** | Days | -0.1239 | 0.1207 | -1.0261 | 6 | 0.3444 | -0.4193 | 0.1715 |  |  |
|----------|----------------------------------------------------------------------------------------------------------------------------------------------------------------------------------------------------------------------------------------------------------------------------------------------------------------------------------------------------------------------------------------------------------------------------------------------------------------------------------------------------------------------------------------------------------------------------------------------------------------------------------------------------|--------|----------|----|--------|---------|---------|-------|-------|--|---------|---------|--------|--------|---|--------|---------|---------|-----|------|---------|--------|---------|---|--------|---------|--------|--|--|
|          | estimate                                                                                                                                                                                                                                                                                                                                                                                                                                                                                                                                                                                                                                           | se     | tval     | df | pval   | ci.lb   | ci.ub   |       |       |  |         |         |        |        |   |        |         |         |     |      |         |        |         |   |        |         |        |  |  |
| intrcpt  | 66.5414                                                                                                                                                                                                                                                                                                                                                                                                                                                                                                                                                                                                                                            | 6.9927 | 9.5158   | 6  | <.0001 | 49.4308 | 83.6519 | ***   |       |  |         |         |        |        |   |        |         |         |     |      |         |        |         |   |        |         |        |  |  |
| Days     | -0.1239                                                                                                                                                                                                                                                                                                                                                                                                                                                                                                                                                                                                                                            | 0.1207 | -1.0261  | 6  | 0.3444 | -0.4193 | 0.1715  |       |       |  |         |         |        |        |   |        |         |         |     |      |         |        |         |   |        |         |        |  |  |
| Reg Plot | <p>The regression plot displays Vaccine Effectiveness on the y-axis (ranging from 40 to 80) against Time in days on the x-axis (ranging from 0 to 125). A blue line represents the linear regression fit, showing a slight downward trend. A grey shaded area around the line indicates the confidence interval. Several data points are plotted as open circles, with some points showing higher effectiveness than the regression line predicts.</p>                                                                                                                                                                                             |        |          |    |        |         |         |       |       |  |         |         |        |        |   |        |         |         |     |      |         |        |         |   |        |         |        |  |  |

Cell is denoted as **green** if meta-regression is performed (i.e., if  $k > 3$ ).

Table S13. Detailed results of VE estimates and VE reduction of booster dose for severe infection outcome

| Variable | overall                                                                                                                                                                                                                                                                                                                                                                                                                                                                                                                                                                                                                                                                                                                                                                                                                                                                                                                                                                                                                                                                                                                                                                                                                                                                                                                                                                                                            |        |          |    |        |         |         |       |       |  |         |         |        |         |    |        |         |         |     |      |         |        |         |    |        |         |         |   |                                                                                                                                                                                                                                                       |
|----------|--------------------------------------------------------------------------------------------------------------------------------------------------------------------------------------------------------------------------------------------------------------------------------------------------------------------------------------------------------------------------------------------------------------------------------------------------------------------------------------------------------------------------------------------------------------------------------------------------------------------------------------------------------------------------------------------------------------------------------------------------------------------------------------------------------------------------------------------------------------------------------------------------------------------------------------------------------------------------------------------------------------------------------------------------------------------------------------------------------------------------------------------------------------------------------------------------------------------------------------------------------------------------------------------------------------------------------------------------------------------------------------------------------------------|--------|----------|----|--------|---------|---------|-------|-------|--|---------|---------|--------|---------|----|--------|---------|---------|-----|------|---------|--------|---------|----|--------|---------|---------|---|-------------------------------------------------------------------------------------------------------------------------------------------------------------------------------------------------------------------------------------------------------|
| Results  | <p>Mixed-Effects Model (k = 12; tau<sup>2</sup> estimator: REML)</p> <p>logLik deviance AIC BIC AICc<br/>                     -30.9074 61.8147 67.8147 68.7225 71.8147</p> <p>tau<sup>2</sup> (estimated amount of residual heterogeneity): 13.4208 (SE = 9.8845)<br/>                     tau (square root of estimated tau<sup>2</sup> value): 3.6634<br/>                     I<sup>2</sup> (residual heterogeneity / unaccounted variability): 75.90%<br/>                     H<sup>2</sup> (unaccounted variability / sampling variability): 4.15<br/>                     R<sup>2</sup> (amount of heterogeneity accounted for): 38.93%</p> <p>Test for Residual Heterogeneity:<br/>                     QE(df = 10) = 32.6589, p-val = 0.0003</p> <p>Test of Moderators (coefficient 2):<br/>                     F(df1 = 1, df2 = 10) = 6.3464, p-val = 0.0304</p> <p>Model Results:</p> <table border="1"> <thead> <tr> <th></th> <th>estimate</th> <th>se</th> <th>tval</th> <th>df</th> <th>pval</th> <th>ci.lb</th> <th>ci.ub</th> <th></th> </tr> </thead> <tbody> <tr> <td>intrcpt</td> <td>93.9648</td> <td>2.5418</td> <td>36.9678</td> <td>10</td> <td>&lt;.0001</td> <td>88.3013</td> <td>99.6283</td> <td>***</td> </tr> <tr> <td>Days</td> <td>-0.0539</td> <td>0.0214</td> <td>-2.5192</td> <td>10</td> <td>0.0304</td> <td>-0.1015</td> <td>-0.0062</td> <td>*</td> </tr> </tbody> </table> |        | estimate | se | tval   | df      | pval    | ci.lb | ci.ub |  | intrcpt | 93.9648 | 2.5418 | 36.9678 | 10 | <.0001 | 88.3013 | 99.6283 | *** | Days | -0.0539 | 0.0214 | -2.5192 | 10 | 0.0304 | -0.1015 | -0.0062 | * | <p>R<sup>2</sup> = 38.93%</p> <p>VE estimate (%):<br/>                     93.96 (88.3 to 99.63), p&lt;.0001</p> <p>Decrease (% per month):<br/>                     -1.617 (-3.045 to -0.186), p: &lt;.0001</p> <p>VE (%) = 93.9648 - 0.0539 day</p> |
|          | estimate                                                                                                                                                                                                                                                                                                                                                                                                                                                                                                                                                                                                                                                                                                                                                                                                                                                                                                                                                                                                                                                                                                                                                                                                                                                                                                                                                                                                           | se     | tval     | df | pval   | ci.lb   | ci.ub   |       |       |  |         |         |        |         |    |        |         |         |     |      |         |        |         |    |        |         |         |   |                                                                                                                                                                                                                                                       |
| intrcpt  | 93.9648                                                                                                                                                                                                                                                                                                                                                                                                                                                                                                                                                                                                                                                                                                                                                                                                                                                                                                                                                                                                                                                                                                                                                                                                                                                                                                                                                                                                            | 2.5418 | 36.9678  | 10 | <.0001 | 88.3013 | 99.6283 | ***   |       |  |         |         |        |         |    |        |         |         |     |      |         |        |         |    |        |         |         |   |                                                                                                                                                                                                                                                       |
| Days     | -0.0539                                                                                                                                                                                                                                                                                                                                                                                                                                                                                                                                                                                                                                                                                                                                                                                                                                                                                                                                                                                                                                                                                                                                                                                                                                                                                                                                                                                                            | 0.0214 | -2.5192  | 10 | 0.0304 | -0.1015 | -0.0062 | *     |       |  |         |         |        |         |    |        |         |         |     |      |         |        |         |    |        |         |         |   |                                                                                                                                                                                                                                                       |

| Reg Plot             | 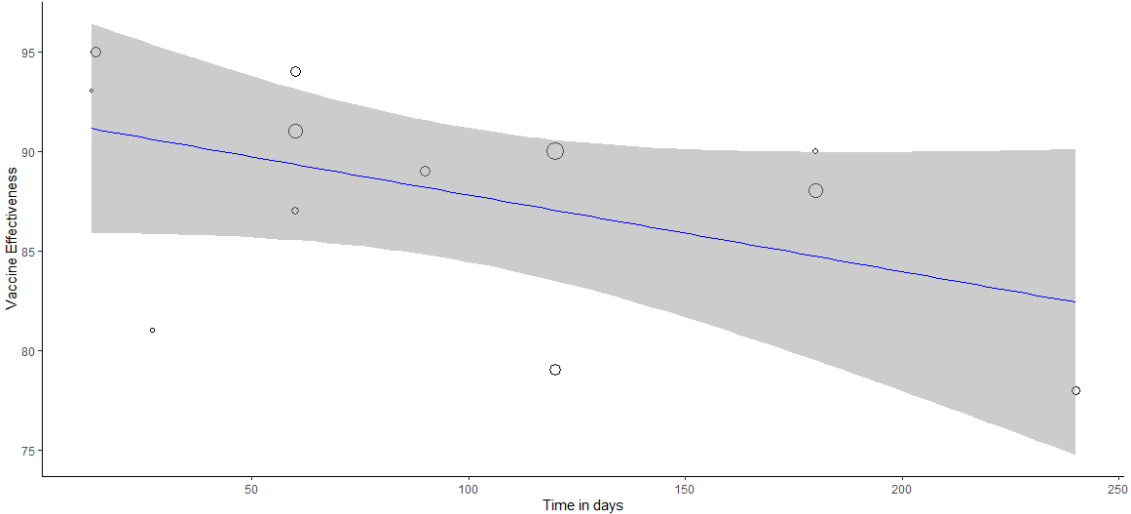                                                                                                                                                                                                                                                                                                                                                                                                        |       |         |   |         |                      |                             |       |        |                                                                                                                                                  |
|----------------------|-------------------------------------------------------------------------------------------------------------------------------------------------------------------------------------------------------------------------------------------------------------------------------------------------------------------------------------------------------------------------------------------------------------------------------------------------------------------------------------------|-------|---------|---|---------|----------------------|-----------------------------|-------|--------|--------------------------------------------------------------------------------------------------------------------------------------------------|
| Variable             | Ad26.COVS.S                                                                                                                                                                                                                                                                                                                                                                                                                                                                               |       |         |   |         |                      |                             |       |        |                                                                                                                                                  |
| Results              | <p>Number of studies combined: k = 2</p> <table border="1" data-bbox="376 847 1503 922"> <thead> <tr> <th>VE</th> <th>95%-CI</th> <th>t</th> <th>p-value</th> </tr> </thead> <tbody> <tr> <td>Random effects model</td> <td>86.0069 [10.8212; 161.1926]</td> <td>14.53</td> <td>0.0437</td> </tr> </tbody> </table> <p>Quantifying heterogeneity:<br/>tau<sup>2</sup> = 0; tau = 0; I<sup>2</sup> = 0.0%; H = 1.00</p> <p>Test of heterogeneity:<br/>Q d.f. p-value<br/>0.48 1 0.4898</p> | VE    | 95%-CI  | t | p-value | Random effects model | 86.0069 [10.8212; 161.1926] | 14.53 | 0.0437 | <p>I<sup>2</sup> = 0%<br/>VE estimate (%):<br/>86.0069 (10.8212 to 161.1926), p:<br/>0.0437<br/>VE reduction estimate (% per month):<br/>N/A</p> |
| VE                   | 95%-CI                                                                                                                                                                                                                                                                                                                                                                                                                                                                                    | t     | p-value |   |         |                      |                             |       |        |                                                                                                                                                  |
| Random effects model | 86.0069 [10.8212; 161.1926]                                                                                                                                                                                                                                                                                                                                                                                                                                                               | 14.53 | 0.0437  |   |         |                      |                             |       |        |                                                                                                                                                  |
| Reg Plot             | N/A                                                                                                                                                                                                                                                                                                                                                                                                                                                                                       |       |         |   |         |                      |                             |       |        |                                                                                                                                                  |
| Variable             | BNT162b2                                                                                                                                                                                                                                                                                                                                                                                                                                                                                  |       |         |   |         |                      |                             |       |        |                                                                                                                                                  |
| Results              | <p>Number of studies combined: k = 2</p> <table border="1" data-bbox="376 1358 1503 1391"> <thead> <tr> <th>VE</th> <th>95%-CI</th> <th>t</th> <th>p-value</th> </tr> </thead> <tbody> <tr> <td></td> <td></td> <td></td> <td></td> </tr> </tbody> </table>                                                                                                                                                                                                                               | VE    | 95%-CI  | t | p-value |                      |                             |       |        | <p>I<sup>2</sup> = 0%<br/>VE estimate (%):</p>                                                                                                   |
| VE                   | 95%-CI                                                                                                                                                                                                                                                                                                                                                                                                                                                                                    | t     | p-value |   |         |                      |                             |       |        |                                                                                                                                                  |
|                      |                                                                                                                                                                                                                                                                                                                                                                                                                                                                                           |       |         |   |         |                      |                             |       |        |                                                                                                                                                  |

|          |                                                                                                                                                                                                                                                                                                                                                                                                                                                                                                                                                                                                                                                                                                                                                                                         |                                                                                                                                                                                                             |
|----------|-----------------------------------------------------------------------------------------------------------------------------------------------------------------------------------------------------------------------------------------------------------------------------------------------------------------------------------------------------------------------------------------------------------------------------------------------------------------------------------------------------------------------------------------------------------------------------------------------------------------------------------------------------------------------------------------------------------------------------------------------------------------------------------------|-------------------------------------------------------------------------------------------------------------------------------------------------------------------------------------------------------------|
|          | <p>Random effects model 89.0460 [86.3850; 91.7069] 425.20 0.0015</p> <p>Quantifying heterogeneity:<br/>tau<sup>2</sup> = 0; tau = 0; I<sup>2</sup> = 0.0%; H = 1.00</p> <p>Test of heterogeneity:<br/>Q d.f. p-value<br/>0.01 1 0.9256</p>                                                                                                                                                                                                                                                                                                                                                                                                                                                                                                                                              | <p>89.0460 (86.3850 to 91.7069),<br/>p:0.0015<br/>VE reduction estimate (% per month):<br/>N/A</p>                                                                                                          |
| Reg Plot | N/A                                                                                                                                                                                                                                                                                                                                                                                                                                                                                                                                                                                                                                                                                                                                                                                     |                                                                                                                                                                                                             |
| Variable | ChAdOx1 nCov-19                                                                                                                                                                                                                                                                                                                                                                                                                                                                                                                                                                                                                                                                                                                                                                         |                                                                                                                                                                                                             |
| Results  | N/A                                                                                                                                                                                                                                                                                                                                                                                                                                                                                                                                                                                                                                                                                                                                                                                     |                                                                                                                                                                                                             |
| Reg Plot | N/A                                                                                                                                                                                                                                                                                                                                                                                                                                                                                                                                                                                                                                                                                                                                                                                     |                                                                                                                                                                                                             |
| Variable | mixture                                                                                                                                                                                                                                                                                                                                                                                                                                                                                                                                                                                                                                                                                                                                                                                 |                                                                                                                                                                                                             |
| Results  | <p>Mixed-Effects Model (k = 3; tau<sup>2</sup> estimator: REML)</p> <p>logLik deviance AIC BIC AICc<br/>-3.4703 6.9405 12.9405 6.9405 36.9405</p> <p>tau<sup>2</sup> (estimated amount of residual heterogeneity): 58.1247 (SE = 85.5599)<br/>tau (square root of estimated tau<sup>2</sup> value): 7.6240<br/>I<sup>2</sup> (residual heterogeneity / unaccounted variability): 96.07%<br/>H<sup>2</sup> (unaccounted variability / sampling variability): 25.47<br/>R<sup>2</sup> (amount of heterogeneity accounted for): 0.00%</p> <p>Test for Residual Heterogeneity:<br/>QE(df = 1) = 25.4703, p-val &lt; .0001</p> <p>Test of Moderators (coefficient 2):<br/>F(df1 = 1, df2 = 1) = 0.0467, p-val = 0.8645</p> <p>Model Results:</p> <p>estimate se tval df pval ci.lb ci.ub</p> | <p>R<sup>2</sup> = 0%<br/>VE estimate (%):<br/>89.34 (-157.54 to 336.22), p:0.1363<br/>VE reduction estimate (% per month):<br/>-1.17 (-69.903 to 67.566), p:0.8645</p> <p>VE (%) = 89.3373 - 0.039 day</p> |

|          |                                                                                                                                                                                                                                                                                                                                                                                                                                                                                                                                                                                                                                                                                                                           |                                                                                                                                                                                                                      |
|----------|---------------------------------------------------------------------------------------------------------------------------------------------------------------------------------------------------------------------------------------------------------------------------------------------------------------------------------------------------------------------------------------------------------------------------------------------------------------------------------------------------------------------------------------------------------------------------------------------------------------------------------------------------------------------------------------------------------------------------|----------------------------------------------------------------------------------------------------------------------------------------------------------------------------------------------------------------------|
|          | <pre> intrcpt 89.3373 19.4298 4.5979 1 0.1363 -157.5421 336.2167 Days    -0.0390 0.1803 -0.2160 1 0.8645 -2.3301 2.2522 </pre>                                                                                                                                                                                                                                                                                                                                                                                                                                                                                                                                                                                            |                                                                                                                                                                                                                      |
| Reg Plot |                                                                                                                                                                                                                                                                                                                                                                                                                                                                                                                                                                                                                                                                                                                           |                                                                                                                                                                                                                      |
| Variable | Mixture of mRNA                                                                                                                                                                                                                                                                                                                                                                                                                                                                                                                                                                                                                                                                                                           |                                                                                                                                                                                                                      |
| Results  | <p>Mixed-Effects Model (k = 5; tau<sup>2</sup> estimator: REML)</p> <p>logLik deviance AIC BIC AICc<br/> -7.1849 14.3698 20.3698 17.6656 44.3698</p> <p>tau<sup>2</sup> (estimated amount of residual heterogeneity): 1.7452 (SE = 5.1685)<br/> tau (square root of estimated tau<sup>2</sup> value): 1.3210<br/> I<sup>2</sup> (residual heterogeneity / unaccounted variability): 27.20%<br/> H<sup>2</sup> (unaccounted variability / sampling variability): 1.37<br/> R<sup>2</sup> (amount of heterogeneity accounted for): 91.43%</p> <p>Test for Residual Heterogeneity:<br/> QE(df = 3) = 4.1131, p-val = 0.2495</p> <p>Test of Moderators (coefficient 2):<br/> F(df1 = 1, df2 = 3) = 9.7430, p-val = 0.0524</p> | <p>R<sup>2</sup> = 91.43%<br/> VE estimate (%):<br/> 95.26 (89.19 to 101.34), p:&lt;.0001<br/> VE reduction estimate (% per month):<br/> -1.434 (-2.895 to 0.027), p:0.0524</p> <p>VE (%) = 95.2629 - 0.0478 day</p> |

|          |                                                                                                                                                                                                                      |                                                                                    |
|----------|----------------------------------------------------------------------------------------------------------------------------------------------------------------------------------------------------------------------|------------------------------------------------------------------------------------|
|          | <p>Model Results:</p> <pre> estimate   se   tval df  pval  ci.lb  ci.ub intrcpt  95.2629  1.9087  49.9093  3 &lt;.0001  89.1885  101.3373 *** Days     -0.0478  0.0153  -3.1214  3  0.0524  -0.0965  0.0009 . </pre> |                                                                                    |
| Reg Plot |                                                                                                                                                                                                                      |                                                                                    |
| Variable | mRNA-1273                                                                                                                                                                                                            |                                                                                    |
| Results  | VE: 99.2% (76.3% to 100%)                                                                                                                                                                                            | VE estimate (%): 99.2% (76.3% to 100%)<br>VE reduction estimate (% per month): N/A |
| Reg Plot | N/A                                                                                                                                                                                                                  |                                                                                    |

Cell is denoted as **green** if meta-regression is performed (i.e., if  $k > 3$ ). Cell is denoted as **yellow** if the result is calculated from meta-analysis of two report ( $k = 2$ ). Cell is denoted as **orange** if the result is from a report ( $k = 1$ ) which stays the same as what has been reported by the original study. Cell is denoted as **red** if the result has not been reported by any studies ( $k = 0$ ).

Table S14. Detailed results of VE estimates and VE reduction of booster dose for symptomatic infection outcome

| Variable | overall                                                                                                                                                                                                                                                                                                                                                                                                                                                                                                                                                                                                                                                                                                                                                                                                                                                                                                                                                                                                                                                                                                                                                                                                                                                                                                                                                                                                                           |        |          |    |        |         |         |       |       |  |         |         |        |         |    |        |         |         |     |      |         |        |         |    |        |         |         |    |                                                                                                                                                                                                                                                                  |
|----------|-----------------------------------------------------------------------------------------------------------------------------------------------------------------------------------------------------------------------------------------------------------------------------------------------------------------------------------------------------------------------------------------------------------------------------------------------------------------------------------------------------------------------------------------------------------------------------------------------------------------------------------------------------------------------------------------------------------------------------------------------------------------------------------------------------------------------------------------------------------------------------------------------------------------------------------------------------------------------------------------------------------------------------------------------------------------------------------------------------------------------------------------------------------------------------------------------------------------------------------------------------------------------------------------------------------------------------------------------------------------------------------------------------------------------------------|--------|----------|----|--------|---------|---------|-------|-------|--|---------|---------|--------|---------|----|--------|---------|---------|-----|------|---------|--------|---------|----|--------|---------|---------|----|------------------------------------------------------------------------------------------------------------------------------------------------------------------------------------------------------------------------------------------------------------------|
| Results  | <p>Mixed-Effects Model (k = 32; tau<sup>2</sup> estimator: REML)</p> <p>logLik deviance AIC BIC AICc<br/>                     -129.3988 258.7975 264.7975 269.0011 265.7206</p> <p>tau<sup>2</sup> (estimated amount of residual heterogeneity): 297.8935 (SE = 84.8558)<br/>                     tau (square root of estimated tau<sup>2</sup> value): 17.2596<br/>                     I<sup>2</sup> (residual heterogeneity / unaccounted variability): 99.81%<br/>                     H<sup>2</sup> (unaccounted variability / sampling variability): 517.13<br/>                     R<sup>2</sup> (amount of heterogeneity accounted for): 15.68%</p> <p>Test for Residual Heterogeneity:<br/>                     QE(df = 30) = 6592.3798, p-val &lt; .0001</p> <p>Test of Moderators (coefficient 2):<br/>                     F(df1 = 1, df2 = 30) = 8.9309, p-val = 0.0055</p> <p>Model Results:</p> <table border="1"> <thead> <tr> <th></th> <th>estimate</th> <th>se</th> <th>tval</th> <th>df</th> <th>pval</th> <th>ci.lb</th> <th>ci.ub</th> <th></th> </tr> </thead> <tbody> <tr> <td>intrcpt</td> <td>65.0327</td> <td>5.1151</td> <td>12.7138</td> <td>30</td> <td>&lt;.0001</td> <td>54.5863</td> <td>75.4791</td> <td>***</td> </tr> <tr> <td>Days</td> <td>-0.1286</td> <td>0.0430</td> <td>-2.9885</td> <td>30</td> <td>0.0055</td> <td>-0.2164</td> <td>-0.0407</td> <td>**</td> </tr> </tbody> </table> |        | estimate | se | tval   | df      | pval    | ci.lb | ci.ub |  | intrcpt | 65.0327 | 5.1151 | 12.7138 | 30 | <.0001 | 54.5863 | 75.4791 | *** | Days | -0.1286 | 0.0430 | -2.9885 | 30 | 0.0055 | -0.2164 | -0.0407 | ** | <p>R<sup>2</sup> = 15.68%</p> <p>VE estimate (%):<br/>                     65.03 (54.59 to 75.48), p:&lt;.0001</p> <p>VE reduction estimate (% per month):<br/>                     -3.858 (-6.492 to -1.221), p:0.0055</p> <p>VE (%) = 65.0327 - 0.1286 day</p> |
|          | estimate                                                                                                                                                                                                                                                                                                                                                                                                                                                                                                                                                                                                                                                                                                                                                                                                                                                                                                                                                                                                                                                                                                                                                                                                                                                                                                                                                                                                                          | se     | tval     | df | pval   | ci.lb   | ci.ub   |       |       |  |         |         |        |         |    |        |         |         |     |      |         |        |         |    |        |         |         |    |                                                                                                                                                                                                                                                                  |
| intrcpt  | 65.0327                                                                                                                                                                                                                                                                                                                                                                                                                                                                                                                                                                                                                                                                                                                                                                                                                                                                                                                                                                                                                                                                                                                                                                                                                                                                                                                                                                                                                           | 5.1151 | 12.7138  | 30 | <.0001 | 54.5863 | 75.4791 | ***   |       |  |         |         |        |         |    |        |         |         |     |      |         |        |         |    |        |         |         |    |                                                                                                                                                                                                                                                                  |
| Days     | -0.1286                                                                                                                                                                                                                                                                                                                                                                                                                                                                                                                                                                                                                                                                                                                                                                                                                                                                                                                                                                                                                                                                                                                                                                                                                                                                                                                                                                                                                           | 0.0430 | -2.9885  | 30 | 0.0055 | -0.2164 | -0.0407 | **    |       |  |         |         |        |         |    |        |         |         |     |      |         |        |         |    |        |         |         |    |                                                                                                                                                                                                                                                                  |



|          |                                                                                                                                                                                                                                                                                                                                                                                                                                                                                                                                                                                                                                                                                  |                                                                                                                                                                                                                        |
|----------|----------------------------------------------------------------------------------------------------------------------------------------------------------------------------------------------------------------------------------------------------------------------------------------------------------------------------------------------------------------------------------------------------------------------------------------------------------------------------------------------------------------------------------------------------------------------------------------------------------------------------------------------------------------------------------|------------------------------------------------------------------------------------------------------------------------------------------------------------------------------------------------------------------------|
| Reg Plot |                                                                                                                                                                                                                                                                                                                                                                                                                                                                                                                                                                                                                                                                                  |                                                                                                                                                                                                                        |
| Variable | Ad26.COV2.S                                                                                                                                                                                                                                                                                                                                                                                                                                                                                                                                                                                                                                                                      |                                                                                                                                                                                                                        |
| Results  | N/A                                                                                                                                                                                                                                                                                                                                                                                                                                                                                                                                                                                                                                                                              |                                                                                                                                                                                                                        |
| Reg Plot | N/A                                                                                                                                                                                                                                                                                                                                                                                                                                                                                                                                                                                                                                                                              |                                                                                                                                                                                                                        |
| Variable | BNT162b2                                                                                                                                                                                                                                                                                                                                                                                                                                                                                                                                                                                                                                                                         |                                                                                                                                                                                                                        |
| Results  | <p>Mixed-Effects Model (k = 17; tau<sup>2</sup> estimator: REML)</p> <p>logLik deviance    AIC    BIC    AICc<br/> -57.6048 115.2096 121.2096 123.3337 123.3914</p> <p>tau<sup>2</sup> (estimated amount of residual heterogeneity):    103.7006 (SE = 47.6416)<br/> tau (square root of estimated tau<sup>2</sup> value):            10.1834<br/> I<sup>2</sup> (residual heterogeneity / unaccounted variability): 99.13%<br/> H<sup>2</sup> (unaccounted variability / sampling variability): 115.43<br/> R<sup>2</sup> (amount of heterogeneity accounted for):            68.20%</p> <p>Test for Residual Heterogeneity:<br/> QE(df = 15) = 1755.9344, p-val &lt; .0001</p> | <p>R<sup>2</sup> = 68.2%<br/> VE estimate (%):<br/> 68.79 (59.21 to 78.38), p:&lt;.0001<br/> VE reduction estimate (% per month):<br/> -6.423 (-8.898 to -3.948), p:&lt;.0001</p> <p>VE (%) = 68.7937 - 0.2141 day</p> |

|                      | <p>Test of Moderators (coefficient 2):<br/> <math>F(df1 = 1, df2 = 15) = 30.6190, p\text{-val} &lt; .0001</math></p> <p>Model Results:</p> <table border="1"> <thead> <tr> <th></th> <th>estimate</th> <th>se</th> <th>tval</th> <th>df</th> <th>pval</th> <th>ci.lb</th> <th>ci.ub</th> <th></th> </tr> </thead> <tbody> <tr> <td>intrcpt</td> <td>68.7937</td> <td>4.4963</td> <td>15.3002</td> <td>15</td> <td>&lt;.0001</td> <td>59.2101</td> <td>78.3773</td> <td>***</td> </tr> <tr> <td>Days</td> <td>-0.2141</td> <td>0.0387</td> <td>-5.5334</td> <td>15</td> <td>&lt;.0001</td> <td>-0.2966</td> <td>-0.1316</td> <td>***</td> </tr> </tbody> </table> |                     | estimate | se      | tval   | df      | pval    | ci.lb                | ci.ub   |                     | intrcpt | 68.7937 | 4.4963                                                                                                                                                                   | 15.3002 | 15 | <.0001 | 59.2101 | 78.3773 | *** | Days | -0.2141 | 0.0387 | -5.5334 | 15 | <.0001 | -0.2966 | -0.1316 | *** |  |
|----------------------|------------------------------------------------------------------------------------------------------------------------------------------------------------------------------------------------------------------------------------------------------------------------------------------------------------------------------------------------------------------------------------------------------------------------------------------------------------------------------------------------------------------------------------------------------------------------------------------------------------------------------------------------------------------|---------------------|----------|---------|--------|---------|---------|----------------------|---------|---------------------|---------|---------|--------------------------------------------------------------------------------------------------------------------------------------------------------------------------|---------|----|--------|---------|---------|-----|------|---------|--------|---------|----|--------|---------|---------|-----|--|
|                      | estimate                                                                                                                                                                                                                                                                                                                                                                                                                                                                                                                                                                                                                                                         | se                  | tval     | df      | pval   | ci.lb   | ci.ub   |                      |         |                     |         |         |                                                                                                                                                                          |         |    |        |         |         |     |      |         |        |         |    |        |         |         |     |  |
| intrcpt              | 68.7937                                                                                                                                                                                                                                                                                                                                                                                                                                                                                                                                                                                                                                                          | 4.4963              | 15.3002  | 15      | <.0001 | 59.2101 | 78.3773 | ***                  |         |                     |         |         |                                                                                                                                                                          |         |    |        |         |         |     |      |         |        |         |    |        |         |         |     |  |
| Days                 | -0.2141                                                                                                                                                                                                                                                                                                                                                                                                                                                                                                                                                                                                                                                          | 0.0387              | -5.5334  | 15      | <.0001 | -0.2966 | -0.1316 | ***                  |         |                     |         |         |                                                                                                                                                                          |         |    |        |         |         |     |      |         |        |         |    |        |         |         |     |  |
| Reg Plot             |                                                                                                                                                                                                                                                                                                                                                                                                                                                                                                                                                                                                                                                                  |                     |          |         |        |         |         |                      |         |                     |         |         |                                                                                                                                                                          |         |    |        |         |         |     |      |         |        |         |    |        |         |         |     |  |
| Variable             | ChAdOx1 nCov-19                                                                                                                                                                                                                                                                                                                                                                                                                                                                                                                                                                                                                                                  |                     |          |         |        |         |         |                      |         |                     |         |         |                                                                                                                                                                          |         |    |        |         |         |     |      |         |        |         |    |        |         |         |     |  |
| Results              | <p>Number of studies combined: <math>k = 2</math></p> <table border="1"> <thead> <tr> <th></th> <th>VE</th> <th>95%-CI</th> <th>t</th> <th>p-value</th> </tr> </thead> <tbody> <tr> <td>Random effects model</td> <td>51.4480</td> <td>[-4.9677; 107.8637]</td> <td>11.59</td> <td>0.0548</td> </tr> </tbody> </table> <p>Quantifying heterogeneity:<br/> <math>\tau^2 = 9.6042; \tau = 3.0991; I^2 = 24.2%; H = 1.15</math></p>                                                                                                                                                                                                                                 |                     |          | VE      | 95%-CI | t       | p-value | Random effects model | 51.4480 | [-4.9677; 107.8637] | 11.59   | 0.0548  | <p><math>I^2 = 24.2%</math><br/> VE estimate (%):<br/> 51.4480 (-4.9677 to 107.8637),<br/> <math>p: 0.0548</math><br/> VE reduction estimate (% per month):<br/> N/A</p> |         |    |        |         |         |     |      |         |        |         |    |        |         |         |     |  |
|                      | VE                                                                                                                                                                                                                                                                                                                                                                                                                                                                                                                                                                                                                                                               | 95%-CI              | t        | p-value |        |         |         |                      |         |                     |         |         |                                                                                                                                                                          |         |    |        |         |         |     |      |         |        |         |    |        |         |         |     |  |
| Random effects model | 51.4480                                                                                                                                                                                                                                                                                                                                                                                                                                                                                                                                                                                                                                                          | [-4.9677; 107.8637] | 11.59    | 0.0548  |        |         |         |                      |         |                     |         |         |                                                                                                                                                                          |         |    |        |         |         |     |      |         |        |         |    |        |         |         |     |  |

|          | Test of heterogeneity:<br>Q d.f. p-value<br>1.32 1 0.2506                                                                                                                                                                                                                                                                                                                                                                                                                                                                                                                                                                                                                                                                                                                                                                                                                                                                                                                                                                                                                                                                                                                  |         |          |    |        |            |           |       |       |         |         |         |        |   |        |            |           |      |         |        |         |   |        |          |         |                                                                                                                                                                                                           |
|----------|----------------------------------------------------------------------------------------------------------------------------------------------------------------------------------------------------------------------------------------------------------------------------------------------------------------------------------------------------------------------------------------------------------------------------------------------------------------------------------------------------------------------------------------------------------------------------------------------------------------------------------------------------------------------------------------------------------------------------------------------------------------------------------------------------------------------------------------------------------------------------------------------------------------------------------------------------------------------------------------------------------------------------------------------------------------------------------------------------------------------------------------------------------------------------|---------|----------|----|--------|------------|-----------|-------|-------|---------|---------|---------|--------|---|--------|------------|-----------|------|---------|--------|---------|---|--------|----------|---------|-----------------------------------------------------------------------------------------------------------------------------------------------------------------------------------------------------------|
| Reg Plot | N/A                                                                                                                                                                                                                                                                                                                                                                                                                                                                                                                                                                                                                                                                                                                                                                                                                                                                                                                                                                                                                                                                                                                                                                        |         |          |    |        |            |           |       |       |         |         |         |        |   |        |            |           |      |         |        |         |   |        |          |         |                                                                                                                                                                                                           |
| Variable | mixture                                                                                                                                                                                                                                                                                                                                                                                                                                                                                                                                                                                                                                                                                                                                                                                                                                                                                                                                                                                                                                                                                                                                                                    |         |          |    |        |            |           |       |       |         |         |         |        |   |        |            |           |      |         |        |         |   |        |          |         |                                                                                                                                                                                                           |
| Results  | <p>Mixed-Effects Model (k = 3; tau^2 estimator: REML)</p> <p>logLik deviance AIC BIC AICc<br/>-5.1995 10.3990 16.3990 10.3990 40.3990</p> <p>tau^2 (estimated amount of residual heterogeneity): 1921.3492 (SE = 2718.1185)<br/>tau (square root of estimated tau^2 value): 43.8332<br/>I^2 (residual heterogeneity / unaccounted variability): 99.97%<br/>H^2 (unaccounted variability / sampling variability): 2953.42<br/>R^2 (amount of heterogeneity accounted for): 0.00%</p> <p>Test for Residual Heterogeneity:<br/>QE(df = 1) = 2953.4221, p-val &lt; .0001</p> <p>Test of Moderators (coefficient 2):<br/>F(df1 = 1, df2 = 1) = 0.0055, p-val = 0.9527</p> <p>Model Results:</p> <table border="1"> <thead> <tr> <th></th> <th>estimate</th> <th>se</th> <th>tval</th> <th>df</th> <th>pval</th> <th>ci.lb</th> <th>ci.ub</th> </tr> </thead> <tbody> <tr> <td>intrcpt</td> <td>59.9937</td> <td>92.9874</td> <td>0.6452</td> <td>1</td> <td>0.6352</td> <td>-1121.5233</td> <td>1241.5107</td> </tr> <tr> <td>Days</td> <td>-0.0666</td> <td>0.8948</td> <td>-0.0744</td> <td>1</td> <td>0.9527</td> <td>-11.4361</td> <td>11.3030</td> </tr> </tbody> </table> |         | estimate | se | tval   | df         | pval      | ci.lb | ci.ub | intrcpt | 59.9937 | 92.9874 | 0.6452 | 1 | 0.6352 | -1121.5233 | 1241.5107 | Days | -0.0666 | 0.8948 | -0.0744 | 1 | 0.9527 | -11.4361 | 11.3030 | <p>R^2 = 0%</p> <p>VE estimate (%):<br/>59.99 (-1121.52 to 1241.51), p:0.6352<br/>VE reduction estimate (% per month):<br/>-1.998 (-343.083 to 339.09), p:0.9527</p> <p>VE (%) = 59.9937 - 0.0666 day</p> |
|          | estimate                                                                                                                                                                                                                                                                                                                                                                                                                                                                                                                                                                                                                                                                                                                                                                                                                                                                                                                                                                                                                                                                                                                                                                   | se      | tval     | df | pval   | ci.lb      | ci.ub     |       |       |         |         |         |        |   |        |            |           |      |         |        |         |   |        |          |         |                                                                                                                                                                                                           |
| intrcpt  | 59.9937                                                                                                                                                                                                                                                                                                                                                                                                                                                                                                                                                                                                                                                                                                                                                                                                                                                                                                                                                                                                                                                                                                                                                                    | 92.9874 | 0.6452   | 1  | 0.6352 | -1121.5233 | 1241.5107 |       |       |         |         |         |        |   |        |            |           |      |         |        |         |   |        |          |         |                                                                                                                                                                                                           |
| Days     | -0.0666                                                                                                                                                                                                                                                                                                                                                                                                                                                                                                                                                                                                                                                                                                                                                                                                                                                                                                                                                                                                                                                                                                                                                                    | 0.8948  | -0.0744  | 1  | 0.9527 | -11.4361   | 11.3030   |       |       |         |         |         |        |   |        |            |           |      |         |        |         |   |        |          |         |                                                                                                                                                                                                           |

|          |                                                                                                                                                                                                                                                                                                                                                                                                                                                                                                                                                                                                                                                                                                                                                                                                                                                                     |         |          |         |     |      |          |         |         |         |         |                                                                                                                                                                                                               |
|----------|---------------------------------------------------------------------------------------------------------------------------------------------------------------------------------------------------------------------------------------------------------------------------------------------------------------------------------------------------------------------------------------------------------------------------------------------------------------------------------------------------------------------------------------------------------------------------------------------------------------------------------------------------------------------------------------------------------------------------------------------------------------------------------------------------------------------------------------------------------------------|---------|----------|---------|-----|------|----------|---------|---------|---------|---------|---------------------------------------------------------------------------------------------------------------------------------------------------------------------------------------------------------------|
| Reg Plot | 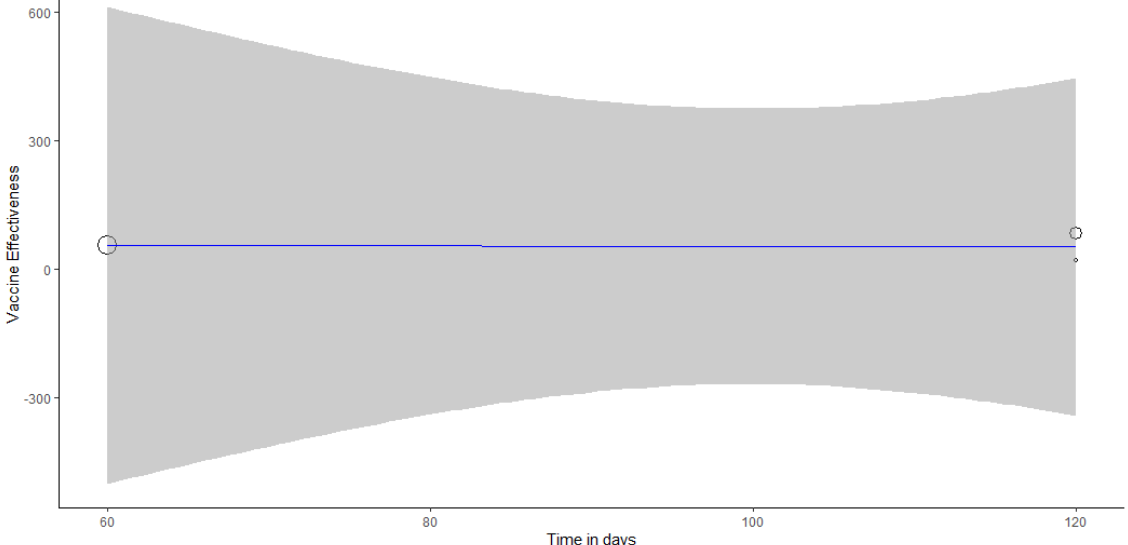                                                                                                                                                                                                                                                                                                                                                                                                                                                                                                                                                                                                                                                                                                                                                                                  |         |          |         |     |      |          |         |         |         |         |                                                                                                                                                                                                               |
| Variable | Mixture of mRNA                                                                                                                                                                                                                                                                                                                                                                                                                                                                                                                                                                                                                                                                                                                                                                                                                                                     |         |          |         |     |      |          |         |         |         |         |                                                                                                                                                                                                               |
| Results  | <p>Mixed-Effects Model (k = 5; tau<sup>2</sup> estimator: REML)</p> <table border="0"> <tr> <td>logLik</td> <td>deviance</td> <td>AIC</td> <td>BIC</td> <td>AICc</td> </tr> <tr> <td>-13.0663</td> <td>26.1326</td> <td>32.1326</td> <td>29.4284</td> <td>56.1326</td> </tr> </table> <p>tau<sup>2</sup> (estimated amount of residual heterogeneity): 236.0327 (SE = 231.3246)<br/> tau (square root of estimated tau<sup>2</sup> value): 15.3634<br/> I<sup>2</sup> (residual heterogeneity / unaccounted variability): 98.40%<br/> H<sup>2</sup> (unaccounted variability / sampling variability): 62.33<br/> R<sup>2</sup> (amount of heterogeneity accounted for): 0.00%</p> <p>Test for Residual Heterogeneity:<br/> QE(df = 3) = 147.6486, p-val &lt; .0001</p> <p>Test of Moderators (coefficient 2):<br/> F(df1 = 1, df2 = 3) = 0.2119, p-val = 0.6766</p> | logLik  | deviance | AIC     | BIC | AICc | -13.0663 | 26.1326 | 32.1326 | 29.4284 | 56.1326 | <p>R<sup>2</sup> = 0%<br/> VE estimate (%):<br/> 76.66 (34.59 to 118.73), p:0.0102<br/> VE reduction estimate (% per month):<br/> -1.119 (-8.862 to 6.621), p:0.6766</p> <p>VE (%) = 76.6635 - 0.0373 day</p> |
| logLik   | deviance                                                                                                                                                                                                                                                                                                                                                                                                                                                                                                                                                                                                                                                                                                                                                                                                                                                            | AIC     | BIC      | AICc    |     |      |          |         |         |         |         |                                                                                                                                                                                                               |
| -13.0663 | 26.1326                                                                                                                                                                                                                                                                                                                                                                                                                                                                                                                                                                                                                                                                                                                                                                                                                                                             | 32.1326 | 29.4284  | 56.1326 |     |      |          |         |         |         |         |                                                                                                                                                                                                               |

|          |                                                                                                                                                                                                                                                                                                                                                                                                                                                                                                                                                         |                                                                                                                                                                                                                     |
|----------|---------------------------------------------------------------------------------------------------------------------------------------------------------------------------------------------------------------------------------------------------------------------------------------------------------------------------------------------------------------------------------------------------------------------------------------------------------------------------------------------------------------------------------------------------------|---------------------------------------------------------------------------------------------------------------------------------------------------------------------------------------------------------------------|
|          | <p>Model Results:</p> <pre> estimate  se  tval df  pval  ci.lb  ci.ub intrcpt  76.6635  13.2197  5.7992  3  0.0102  34.5924  118.7346 * Days     -0.0373  0.0811  -0.4604  3  0.6766  -0.2954  0.2207 </pre>                                                                                                                                                                                                                                                                                                                                            |                                                                                                                                                                                                                     |
| Reg Plot | 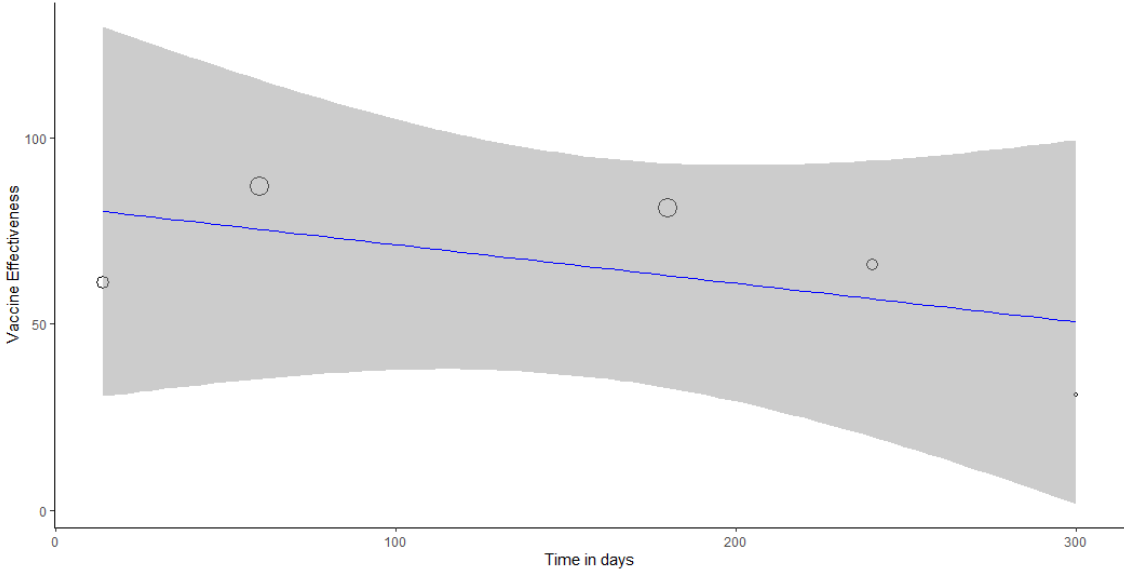                                                                                                                                                                                                                                                                                                                                                                                                                                                                      |                                                                                                                                                                                                                     |
| Variable | mRNA-1273                                                                                                                                                                                                                                                                                                                                                                                                                                                                                                                                               |                                                                                                                                                                                                                     |
| Results  | <p>Mixed-Effects Model (k = 5; tau<sup>2</sup> estimator: REML)</p> <pre> logLik deviance  AIC  BIC  AICc -11.3853  22.7707  28.7707  26.0665  52.7707 </pre> <p>tau<sup>2</sup> (estimated amount of residual heterogeneity): 95.7588 (SE = 92.1843)<br/> tau (square root of estimated tau<sup>2</sup> value): 9.7856<br/> I<sup>2</sup> (residual heterogeneity / unaccounted variability): 94.39%<br/> H<sup>2</sup> (unaccounted variability / sampling variability): 17.84<br/> R<sup>2</sup> (amount of heterogeneity accounted for): 20.38%</p> | <p>R<sup>2</sup> = 20.38%<br/> VE estimate (%):<br/> 78.44 (30.98 to 125.9), p:0.0134<br/> VE reduction estimate (% per month):<br/> -16.152 (-53.139 to 20.835), p:0.2588</p> <p>VE (%) = 78.4407 - 0.5384 day</p> |

|          | <p>Test for Residual Heterogeneity:<br/> QE(df = 3) = 22.5681, p-val &lt; .0001</p> <p>Test of Moderators (coefficient 2):<br/> F(df1 = 1, df2 = 3) = 1.9314, p-val = 0.2588</p> <p>Model Results:</p> <table border="1"> <thead> <tr> <th></th> <th>estimate</th> <th>se</th> <th>tval</th> <th>df</th> <th>pval</th> <th>ci.lb</th> <th>ci.ub</th> </tr> </thead> <tbody> <tr> <td>intrcpt</td> <td>78.4407</td> <td>14.9141</td> <td>5.2595</td> <td>3</td> <td>0.0134</td> <td>30.9773</td> <td>125.9041 *</td> </tr> <tr> <td>Days</td> <td>-0.5384</td> <td>0.3874</td> <td>-1.3898</td> <td>3</td> <td>0.2588</td> <td>-1.7713</td> <td>0.6945</td> </tr> </tbody> </table> |         | estimate | se | tval   | df      | pval       | ci.lb | ci.ub | intrcpt | 78.4407 | 14.9141 | 5.2595 | 3 | 0.0134 | 30.9773 | 125.9041 * | Days | -0.5384 | 0.3874 | -1.3898 | 3 | 0.2588 | -1.7713 | 0.6945 |  |
|----------|------------------------------------------------------------------------------------------------------------------------------------------------------------------------------------------------------------------------------------------------------------------------------------------------------------------------------------------------------------------------------------------------------------------------------------------------------------------------------------------------------------------------------------------------------------------------------------------------------------------------------------------------------------------------------------|---------|----------|----|--------|---------|------------|-------|-------|---------|---------|---------|--------|---|--------|---------|------------|------|---------|--------|---------|---|--------|---------|--------|--|
|          | estimate                                                                                                                                                                                                                                                                                                                                                                                                                                                                                                                                                                                                                                                                           | se      | tval     | df | pval   | ci.lb   | ci.ub      |       |       |         |         |         |        |   |        |         |            |      |         |        |         |   |        |         |        |  |
| intrcpt  | 78.4407                                                                                                                                                                                                                                                                                                                                                                                                                                                                                                                                                                                                                                                                            | 14.9141 | 5.2595   | 3  | 0.0134 | 30.9773 | 125.9041 * |       |       |         |         |         |        |   |        |         |            |      |         |        |         |   |        |         |        |  |
| Days     | -0.5384                                                                                                                                                                                                                                                                                                                                                                                                                                                                                                                                                                                                                                                                            | 0.3874  | -1.3898  | 3  | 0.2588 | -1.7713 | 0.6945     |       |       |         |         |         |        |   |        |         |            |      |         |        |         |   |        |         |        |  |
| Reg Plot | <p>The regression plot displays Vaccine Effectiveness on the y-axis (ranging from 25 to 75) against Time in days on the x-axis (ranging from 20 to 60). A blue line represents the fitted regression model, showing a negative correlation. A grey shaded area around the line indicates the confidence interval. Five data points are plotted as open circles, with approximate coordinates: (22, 55), (30, 72), (35, 65), (42, 55), and (62, 40).</p>                                                                                                                                                                                                                            |         |          |    |        |         |            |       |       |         |         |         |        |   |        |         |            |      |         |        |         |   |        |         |        |  |

Cell is denoted as **green** if meta-regression is performed (i.e., if  $k > 3$ ). Cell is denoted as **yellow** if the result is calculated from meta-analysis of two report ( $k = 2$ ). Cell is denoted as **red** if the result has not been reported by any studies ( $k = 0$ ).

## S.10. Detailed Results of Meta-analyses for the ‘Within 3 Months’ Model

Table S15. Detailed Results of meta-analyses for within 3 months model

| Variable                      | k  | VED (95%CI)      | p-value of VED | Tau2   | I2 (95%CI)             | p-value of I2 | Chi^2   | df  | p-value of Egger's test |
|-------------------------------|----|------------------|----------------|--------|------------------------|---------------|---------|-----|-------------------------|
| <b>Any Infection</b>          |    |                  |                |        |                        |               |         |     |                         |
| The Overall Result            | 22 | 22% (15% to 29%) | <0,0001        | 0.0207 | 98.3% (97.9% to 98.6%) | <0,0001       | 1214.69 | 21  | 0.203724                |
| <i>Study Design Subgroup:</i> |    |                  |                |        |                        |               |         |     |                         |
| Cohort                        | 6  | 35% (14% to 57%) | <0,0001        | 0.0678 | 99.6% (99.4% to 99.7%) | <0,0001       | 1148.18 | 5   | 0.245683                |
| Case-control                  | 16 | 17% (13% to 21%) | <0,0001        | 0.0041 | 76.1% (61.4% to 85.3%) | <0,0001       | 62.88   | 15  | 0.811881                |
| <i>Vaccine Subgroup:</i>      |    |                  |                |        |                        |               |         |     |                         |
| Ad26.COVS2                    | 0  | N/A              | N/A            | N/A    | N/A                    | N/A           | N/A     | N/A | N/A                     |
| BNT162b2                      | 8  | 25% (8% to 41%)  | <0,0001        | 0.0485 | 98.9% (98.5% to 99.1%) | <0,0001       | 616.65  | 7   | 0.856062                |
| ChAdOx1 nCov-19               | 1  | 16% (2% to 30%)  | N/A            | N/A    | N/A                    | N/A           | N/A     | N/A | N/A                     |
| Mixture                       | 2  | 27% (-1% to 55%) | <0.0001        | 0.0407 | 96.9% (91.8% to 98.8%) | <0.0001       | 32.17   | 1   | N/A                     |
| Mixture of mRNA               | 7  | 15% (6% to 24%)  | <0.0001        | 0.0105 | 79.9% (59% to 90.2%)   | <0.0001       | 29.88   | 6   | 0.845442                |
| mRNA-1273                     | 4  | 25% (4% to 47%)  | <0,0001        | 0.0423 | 96.8% (94.3% to 98.2%) | <0,0001       | 94.28   | 3   | 0.889649                |
| <b>Severe Infection</b>       |    |                  |                |        |                        |               |         |     |                         |
| The Overall Result            | 7  | 20% (8% to 32%)  | <0,0001        | 0.0193 | 81.1% (61.9% to 90.6%) | <0,0001       | 31.8    | 6   | 0.919516                |
| <i>Study Design Subgroup:</i> |    |                  |                |        |                        |               |         |     |                         |
| Cohort                        | 2  | 34% (16% to 52%) | 0.0525         | 0.0126 | 73.4% (0% to 94%)      | 0.0525        | 3.76    | 1   | N/A                     |
| Case-control                  | 5  | 13% (5% to 20%)  | 0.2038         | 0.0024 | 32.6% (0% to 74.4%)    | 0.2038        | 5.94    | 4   | 0.477389                |
| <i>Vaccine Subgroup:</i>      |    |                  |                |        |                        |               |         |     |                         |
| Ad26.COVS2                    | 0  | N/A              | N/A            | N/A    | N/A                    | N/A           | N/A     | N/A | N/A                     |
| BNT162b2                      | 2  | 22% (9% to 35%)  | 0.7444         | 0      | 0% (0% to 0%)          | 0.7444        | 0.11    | 1   | N/A                     |
| ChAdOx1 nCov-19               | 0  | N/A              | N/A            | N/A    | N/A                    | N/A           | N/A     | N/A | N/A                     |
| Mixture                       | 1  | 42% (32% to 52%) | N/A            | N/A    | N/A                    | N/A           | N/A     | N/A | N/A                     |
| Mixture of mRNA               | 4  | 12% (3% to 21%)  | 0.1372         | 0.0036 | 45.7% (0% to 81.9%)    | 0.1372        | 5.52    | 3   | 0.65151                 |
| mRNA-1273                     | 0  | N/A              | N/A            | N/A    | N/A                    | N/A           | N/A     | N/A | N/A                     |

| <b>Symptomatic Infection</b>  |    |                  |         |        |                        |         |        |     |          |
|-------------------------------|----|------------------|---------|--------|------------------------|---------|--------|-----|----------|
| The Overall Result            | 12 | 22% (11% to 34%) | <0,0001 | 0.0371 | 98.5% (98.1% to 98.8%) | <0,0001 | 747    | 11  | 0.989773 |
| <i>Study Design Subgroup:</i> |    |                  |         |        |                        |         |        |     |          |
| Cohort                        | 2  | 51% (49% to 53%) | 0.5383  | 0      | N/A                    | 0.5383  | 0.38   | 1   | N/A      |
| Case-control                  | 10 | 17% (12% to 22%) | <0,0001 | 0.0043 | 81.3% (66.7% to 89.5%) | <0,0001 | 48.11  | 9   | 0.844111 |
| <i>Vaccine Subgroup:</i>      |    |                  |         |        |                        |         |        |     |          |
| Ad26.COVS2                    | 0  | N/A              | N/A     | N/A    | N/A                    | N/A     | N/A    | N/A | N/A      |
| BNT162b2                      | 5  | 25% (5% to 46%)  | 0.0001  | 0.0504 | 99.4% (99.1% to 99.5%) | 0.0001  | 616.01 | 4   | 0.827264 |
| ChAdOx1 nCov-19               | 1  | 16% (2% to 30%)  | N/A     | N/A    | N/A                    | N/A     | N/A    | N/A | N/A      |
| Mixture                       | 0  | N/A              | N/A     | N/A    | N/A                    | N/A     | N/A    | N/A | N/A      |
| Mixture of mRNA               | 3  | 17% (1% to 33%)  | <0.0001 | 0.0177 | 90.7% (75.6% to 96.5%) | <0.0001 | 21.51  | 2   | 0.842218 |
| mRNA-1273                     | 3  | 23% (-7% to 54%) | <0,0001 | 0.0065 | 97.9% (96% to 98.9%)   | <0,0001 | 94.24  | 2   | 0.928712 |

Abbreviation: k, number of analyses; N/A, not available; VED, vaccine effectiveness difference.



### S.11. Detailed Results of Meta-analyses for the ‘Within 3 Months or More’ Model

Table S16. Detailed Results of meta-analyses for within 3 months or more model

| Variable                      | k  | VED (95%CI)       | p-value of VED | Tau2   | I2 (95%CI)           | p-value of I2 | Chi^2   | df  | p-value of Egger’s test |
|-------------------------------|----|-------------------|----------------|--------|----------------------|---------------|---------|-----|-------------------------|
| <b>Any Infection</b>          |    |                   |                |        |                      |               |         |     |                         |
| The Overall Result            | 28 | 30% (24% to 37%)  | <0.0001        | 0.0362 | 97.6% (97% to 98%)   | <0.0001       | 1103.33 | 27  | 0.583963                |
| <i>Study Design Subgroup:</i> |    |                   |                |        |                      |               |         |     |                         |
| Cohort                        | 6  | 43% (22% to 64%)  | <0.0001        | 0.0661 | 99.3% (99% to 99.5%) | <0.0001       | 765.77  | 5   | 0.52177                 |
| Case-control                  | 22 | 27% (21% to 34%)  | <0.0001        | 0.019  | 93.8% (92% to 95.3%) | <0.0001       | 336.14  | 21  | 0.827997                |
| <i>Vaccine Subgroup:</i>      |    |                   |                |        |                      |               |         |     |                         |
| Ad26.CO2                      | 0  | N/A               | N/A            | N/A    | N/A                  | N/A           | N/A     | N/A | N/A                     |
| BNT162b2                      | 9  | 40% (28% to 52%)  | <0.0001        | 0.0271 | 97.7% (97% to 98.3%) | <0.0001       | 345.71  | 8   | 0.666296                |
| ChAdOx1 nCov-19               | 1  | 27% (14% to 41%)  | <0.0001        | N/A    | N/A                  | N/A           | N/A     | N/A | N/A                     |
| Mixture                       | 2  | 29% (-4% to 62%)  | 0.0863         | 0.0542 | 96.7% (91% to 98.8%) | <0.0001       | 30.12   | 1   | N/A                     |
| Mixture of mRNA               | 10 | 21% (14% to 27%)  | <0.0001        | 0.0067 | 79% (62% to 88.4%)   | <0.0001       | 42.93   | 9   | 0.796208                |
| mRNA-1273                     | 6  | 36% (22% to 50%)  | <0.0001        | 0.0241 | 93.3% (88% to 96.2%) | <0.0001       | 74.36   | 5   | 0.291389                |
| <b>Severe Infection</b>       |    |                   |                |        |                      |               |         |     |                         |
| The Overall Result            | 9  | 18% (13% to 23%)  | <0.0001        | 0.0043 | 88.8% (81% to 93.4%) | <0.0001       | 71.34   | 8   | 0.876591                |
| <i>Study Design Subgroup:</i> |    |                   |                |        |                      |               |         |     |                         |
| Cohort                        | 2  | 35% (13% to 57%)  | 0.0016         | 0.0202 | 80% (14% to 95.3%)   | 0.0255        | 4.99    | 1   | N/A                     |
| Case-control                  | 7  | 11% (5% to 17%)   | 0.0004         | 0.0014 | 21.1% (0% to 64.4%)  | 0.2688        | 7.6     | 6   | 0.305242                |
| <i>Vaccine Subgroup:</i>      |    |                   |                |        |                      |               |         |     |                         |
| Ad26.CO2                      | 0  | N/A               | N/A            | N/A    | N/A                  | N/A           | N/A     | N/A | N/A                     |
| BNT162b2                      | 2  | 22% (9% to 35%)   | 0.0008         | 0      | 0% (0% to 0%)        | 0.7444        | 0.11    | 1   | N/A                     |
| ChAdOx1 nCov-19               | 0  | N/A               | N/A            | N/A    | N/A                  | N/A           | N/A     | N/A | N/A                     |
| Mixture                       | 1  | 46% (34% to 58%)  | <0.0001        | N/A    | N/A                  | N/A           | N/A     | N/A | N/A                     |
| Mixture of mRNA               | 5  | 11% (3% to 18%)   | 0.005          | 0.0028 | 41.8% (0% to 78.6%)  | 0.1425        | 6.88    | 4   | 0.483804                |
| mRNA-1273                     | 1  | 15% (-24% to 54%) | 0.4578         | N/A    | N/A                  | N/A           | N/A     | N/A | N/A                     |

| <b>Symptomatic Infection</b>  |    |                  |         |        |                      |         |        |     |          |
|-------------------------------|----|------------------|---------|--------|----------------------|---------|--------|-----|----------|
| The Overall Result            | 14 | 37% (29% to 46%) | <0.0001 | 0.0226 | 97.1% (96% to 97.8%) | <0.0001 | 451.64 | 13  | 0.755126 |
| <i>Study Design Subgroup:</i> |    |                  |         |        |                      |         |        |     |          |
| Cohort                        | 2  | 51% (49% to 53%) | 0       | 0      | 0% (0% to 0%)        | 0.5383  | 0.38   | 1   | N/A      |
| Case-control                  | 12 | 34% (25% to 44%) | <0.0001 | 0.023  | 95.5% (94% to 96.8%) | <0,0001 | 243.29 | 11  | 0.444867 |
| <i>Vaccine Subgroup:</i>      |    |                  |         |        |                      |         |        |     |          |
| Ad26.CO2                      | 0  | N/A              | N/A     | N/A    | N/A                  | N/A     | N/A    | N/A | N/A      |
| BNT162b2                      | 6  | 40% (26% to 55%) | <0.0001 | 0.027  | 98.5% (98% to 98.9%) | <0.0001 | 329.82 | 5   | 0.652238 |
| ChAdOx1 nCov-19               | 1  | 27% (14% to 41%) | <0.0001 | N/A    | N/A                  | N/A     | N/A    | N/A | N/A      |
| Mixture                       | 0  | N/A              | N/A     | N/A    | N/A                  | N/A     | N/A    | N/A | N/A      |
| Mixture of mRNA               | 3  | 28% (20% to 36%) | <0.0001 | 0.0031 | 61.1% (0% to 88.9%)  | 0.0767  | 5.14   | 2   | 0.183352 |
| mRNA-1273                     | 4  | 41% (25% to 56%) | <0.0001 | 0.0226 | 94.4% (89% to 97.2%) | <0,0001 | 53.56  | 3   | 0.470046 |

\*The Egger's test has p-value <0.05 but cannot be an indication of publication bias due to k<10.

Abbreviation: k, number of analyses; N/A, not available; VE, vaccine effectiveness.

## S.12. Sensitivity Analyses for the ‘Within 3 Months’ Model

Figure S1. The result of leave-one-out sensitivity analyses for any infection endpoint in the ‘within 3 months’ model

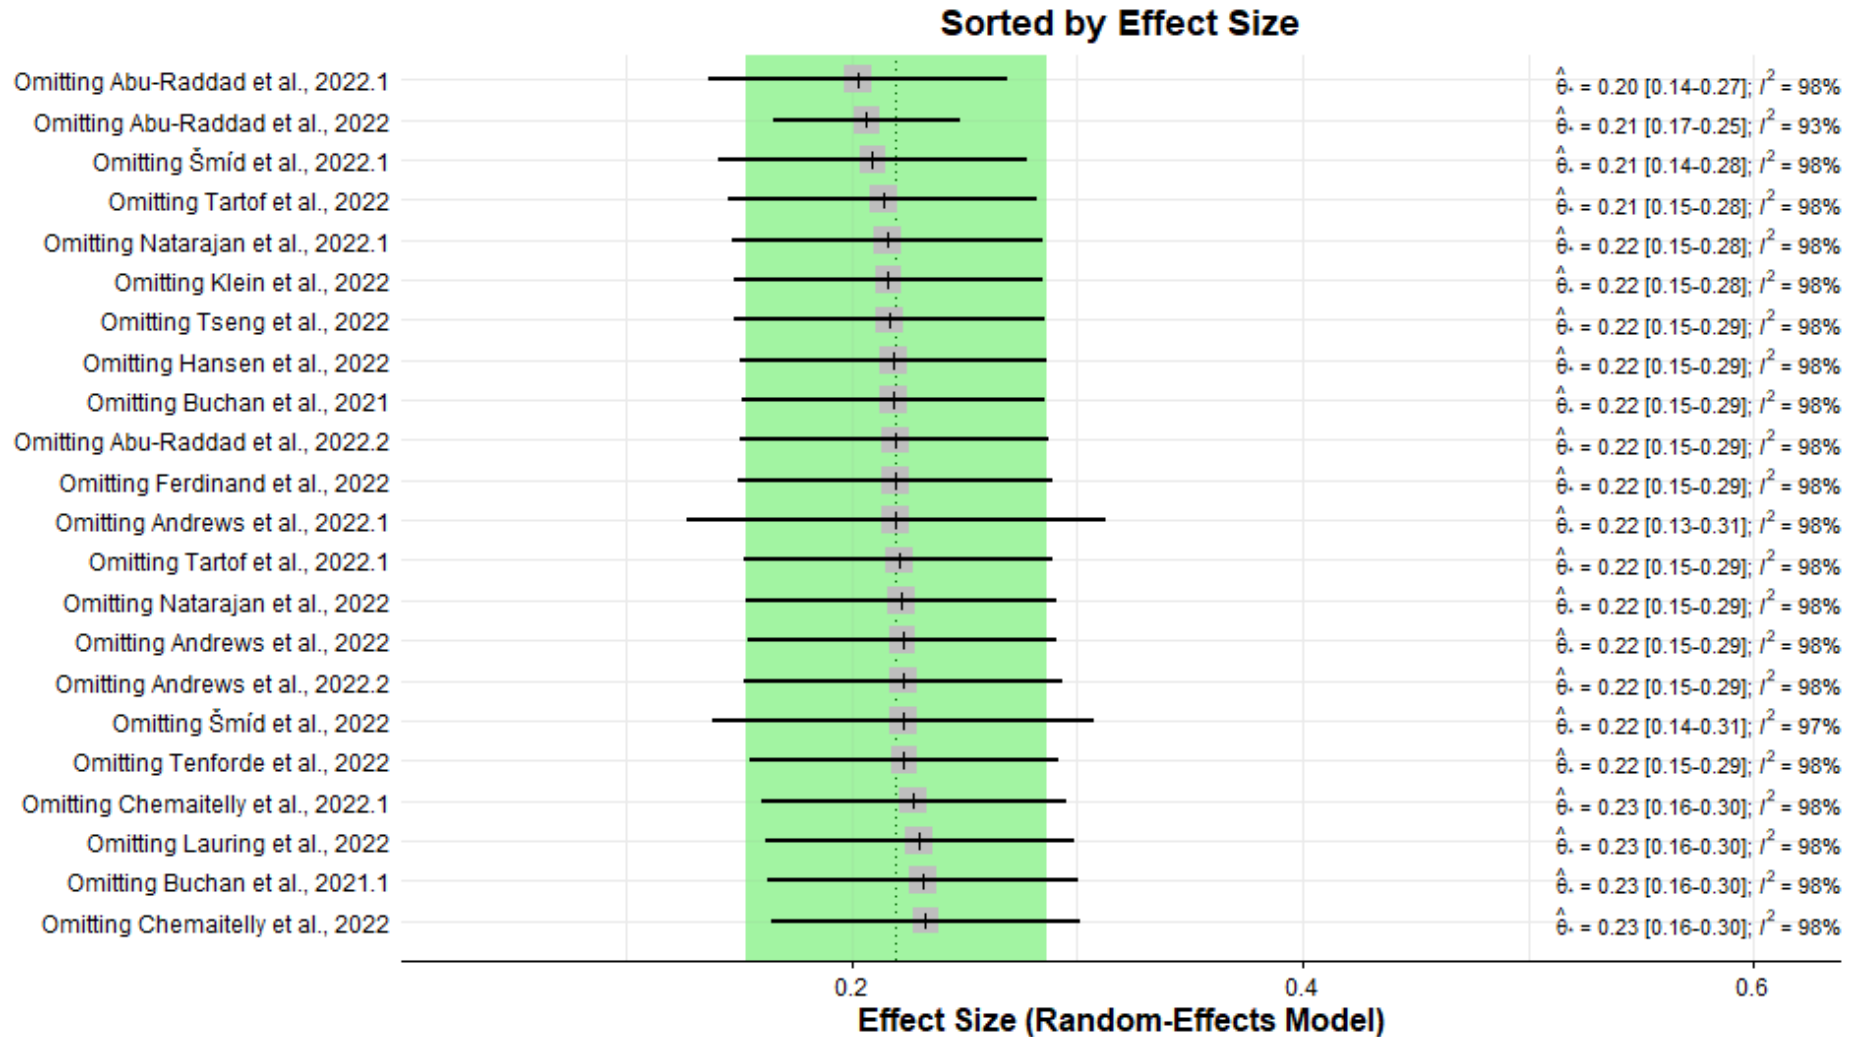

Figure S2. The result of leave-one-out sensitivity analyses for severe infection endpoint in the 'within 3 months' model

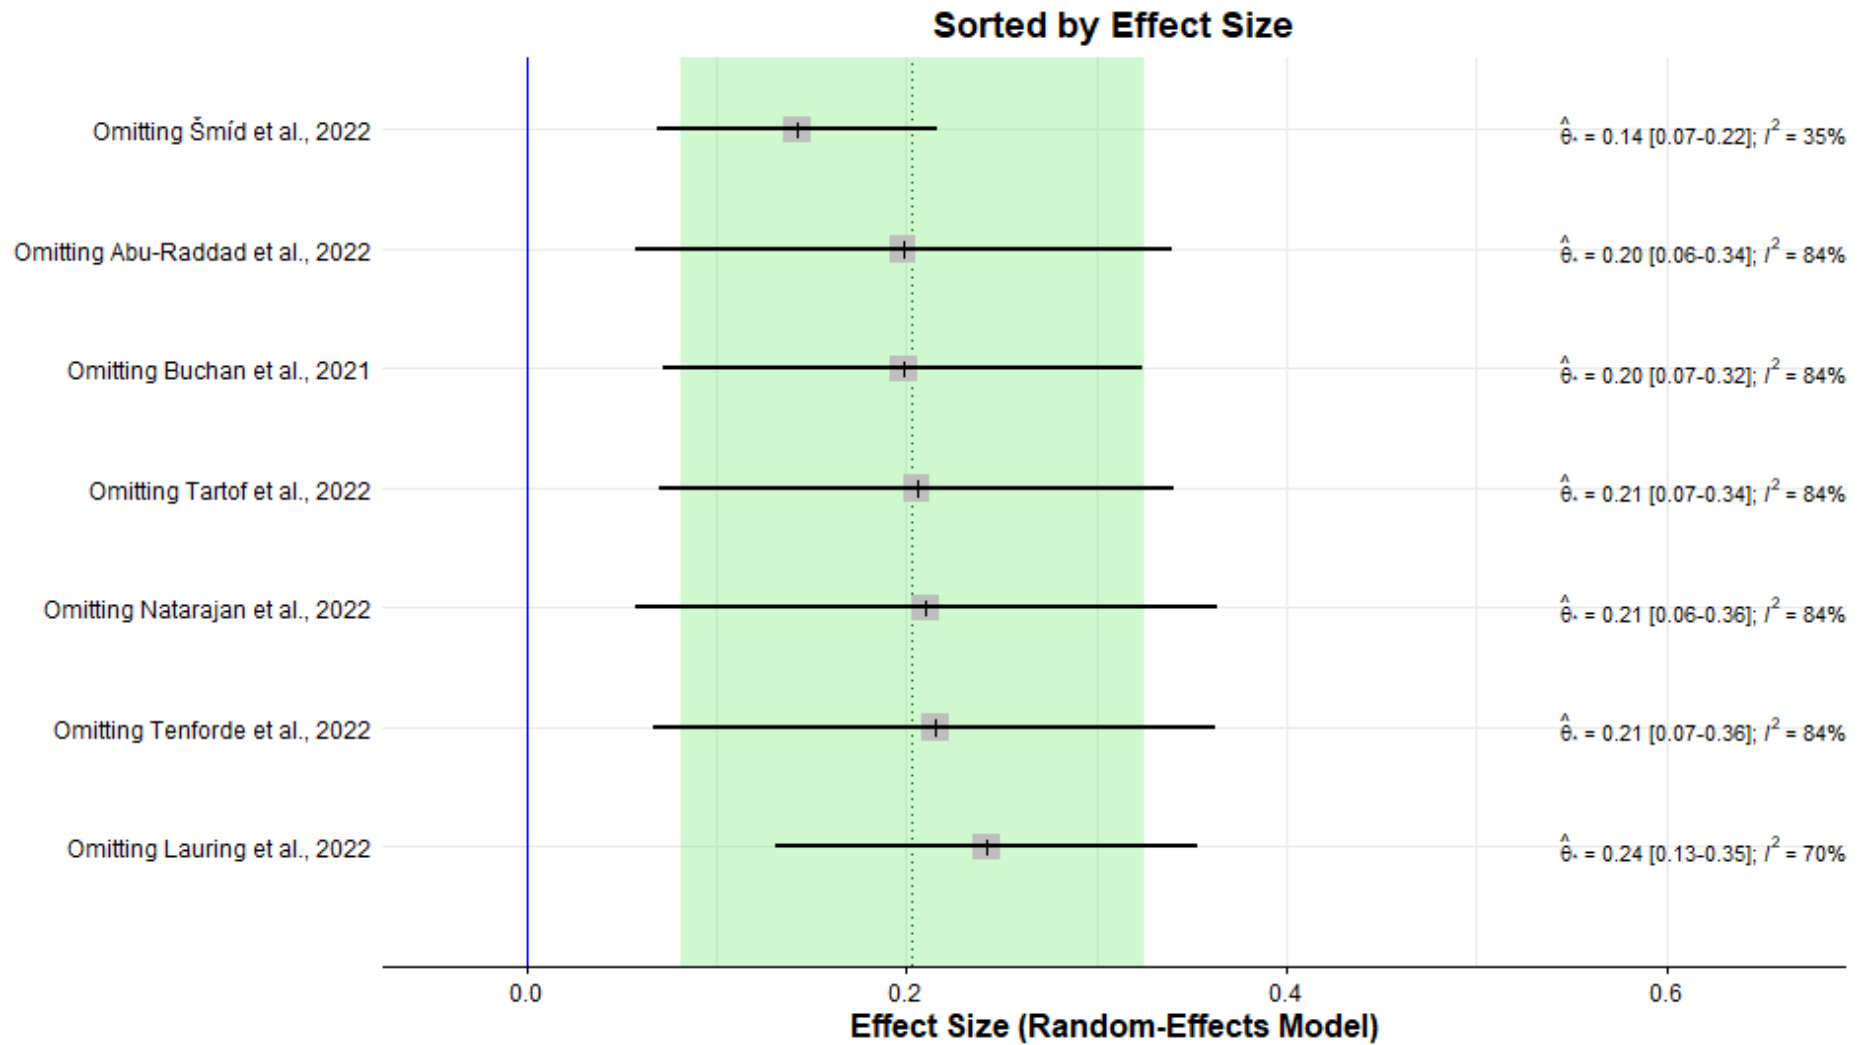

Figure S3. The result of leave-one-out sensitivity analyses for symptomatic infection endpoint in the 'within 3 months' model

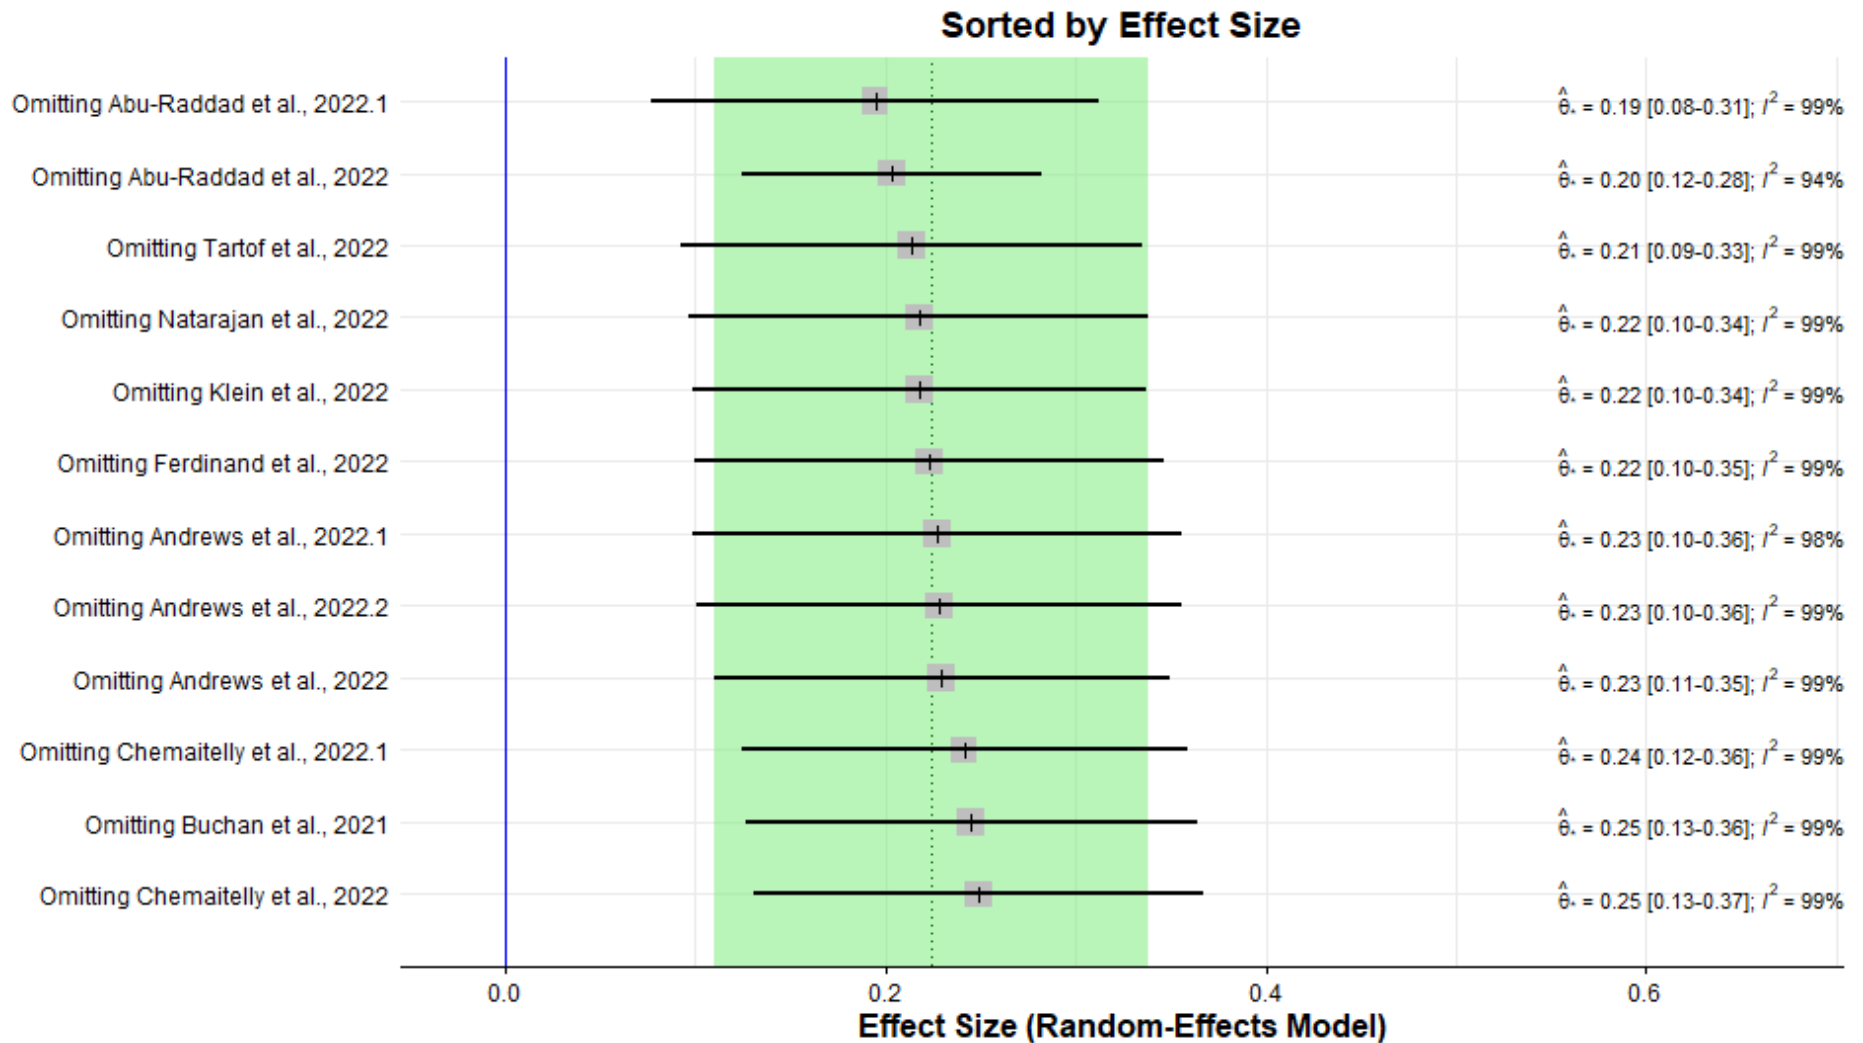

### S.13. Sensitivity Analyses for the 'Within 3 Months or More' Model

Figure S4. The result of leave-one-out sensitivity analyses for any infection endpoint in the 'within 3 months or more' model

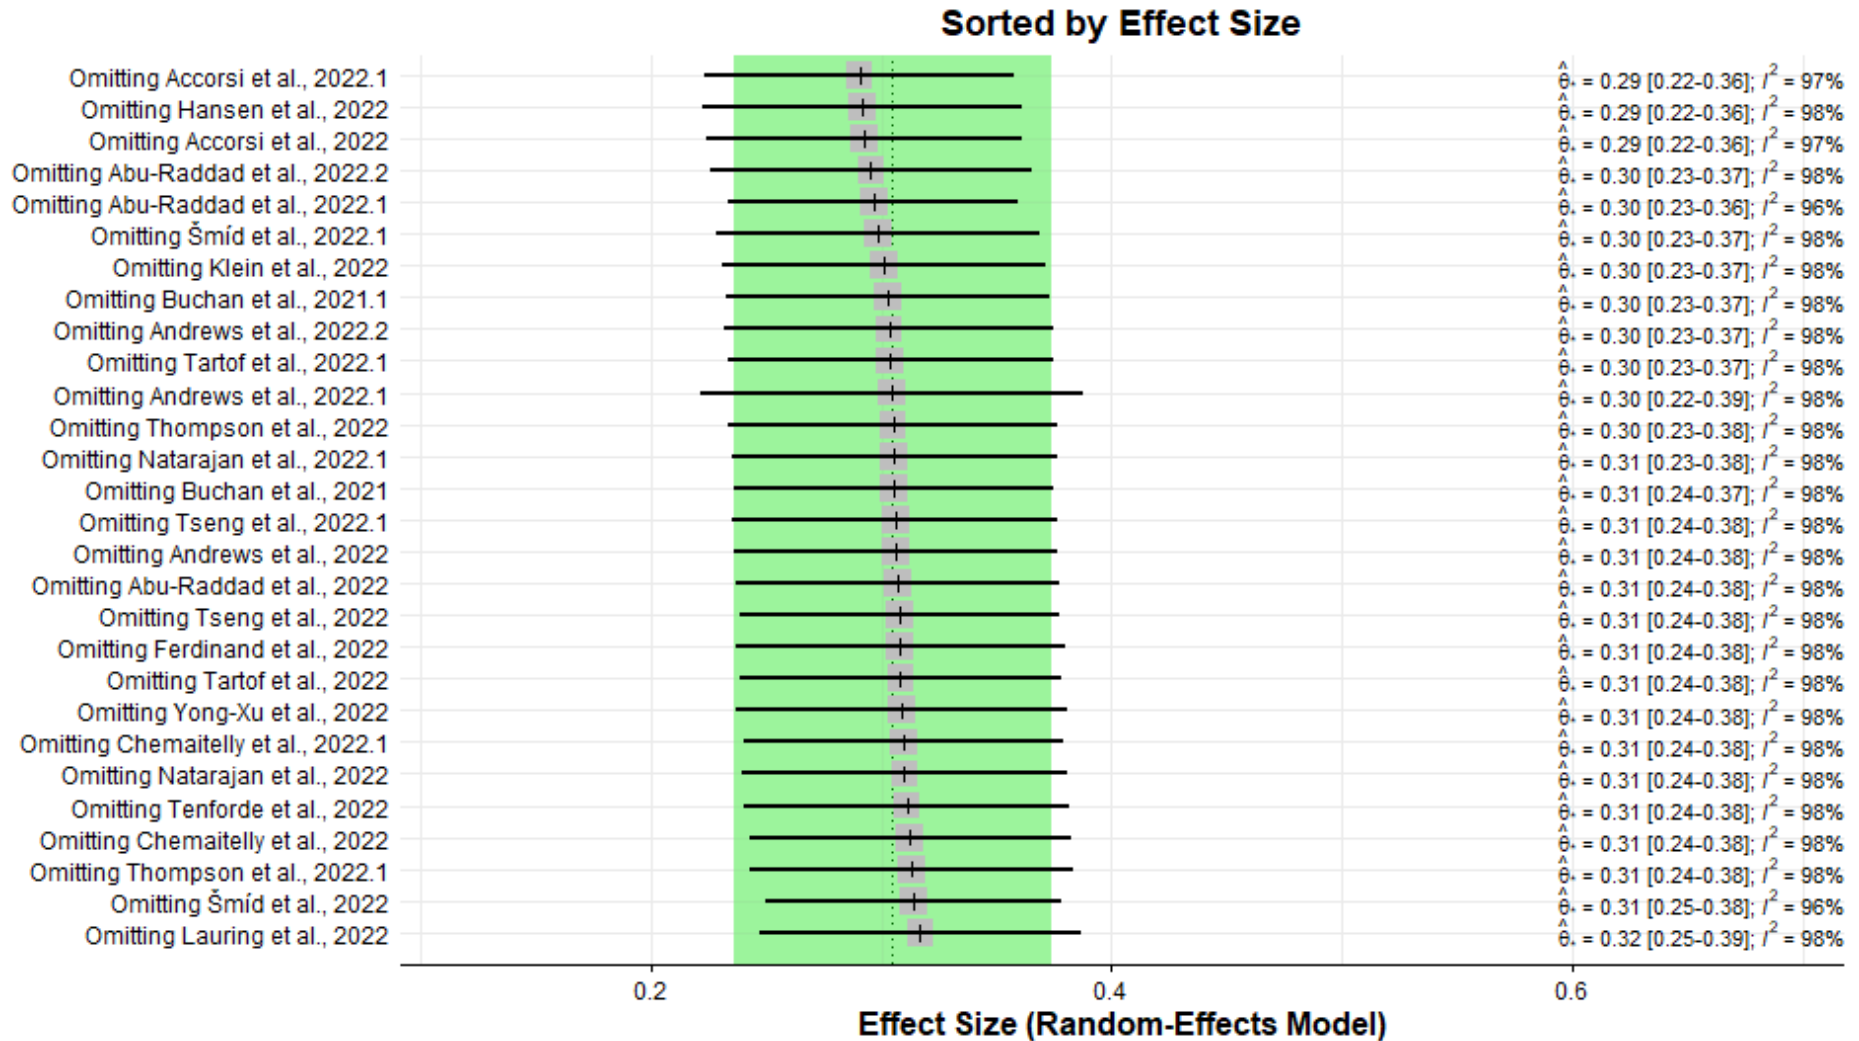

Figure S5. The result of leave-one-out sensitivity analyses for severe infection endpoint in the 'within 3 months or more' model

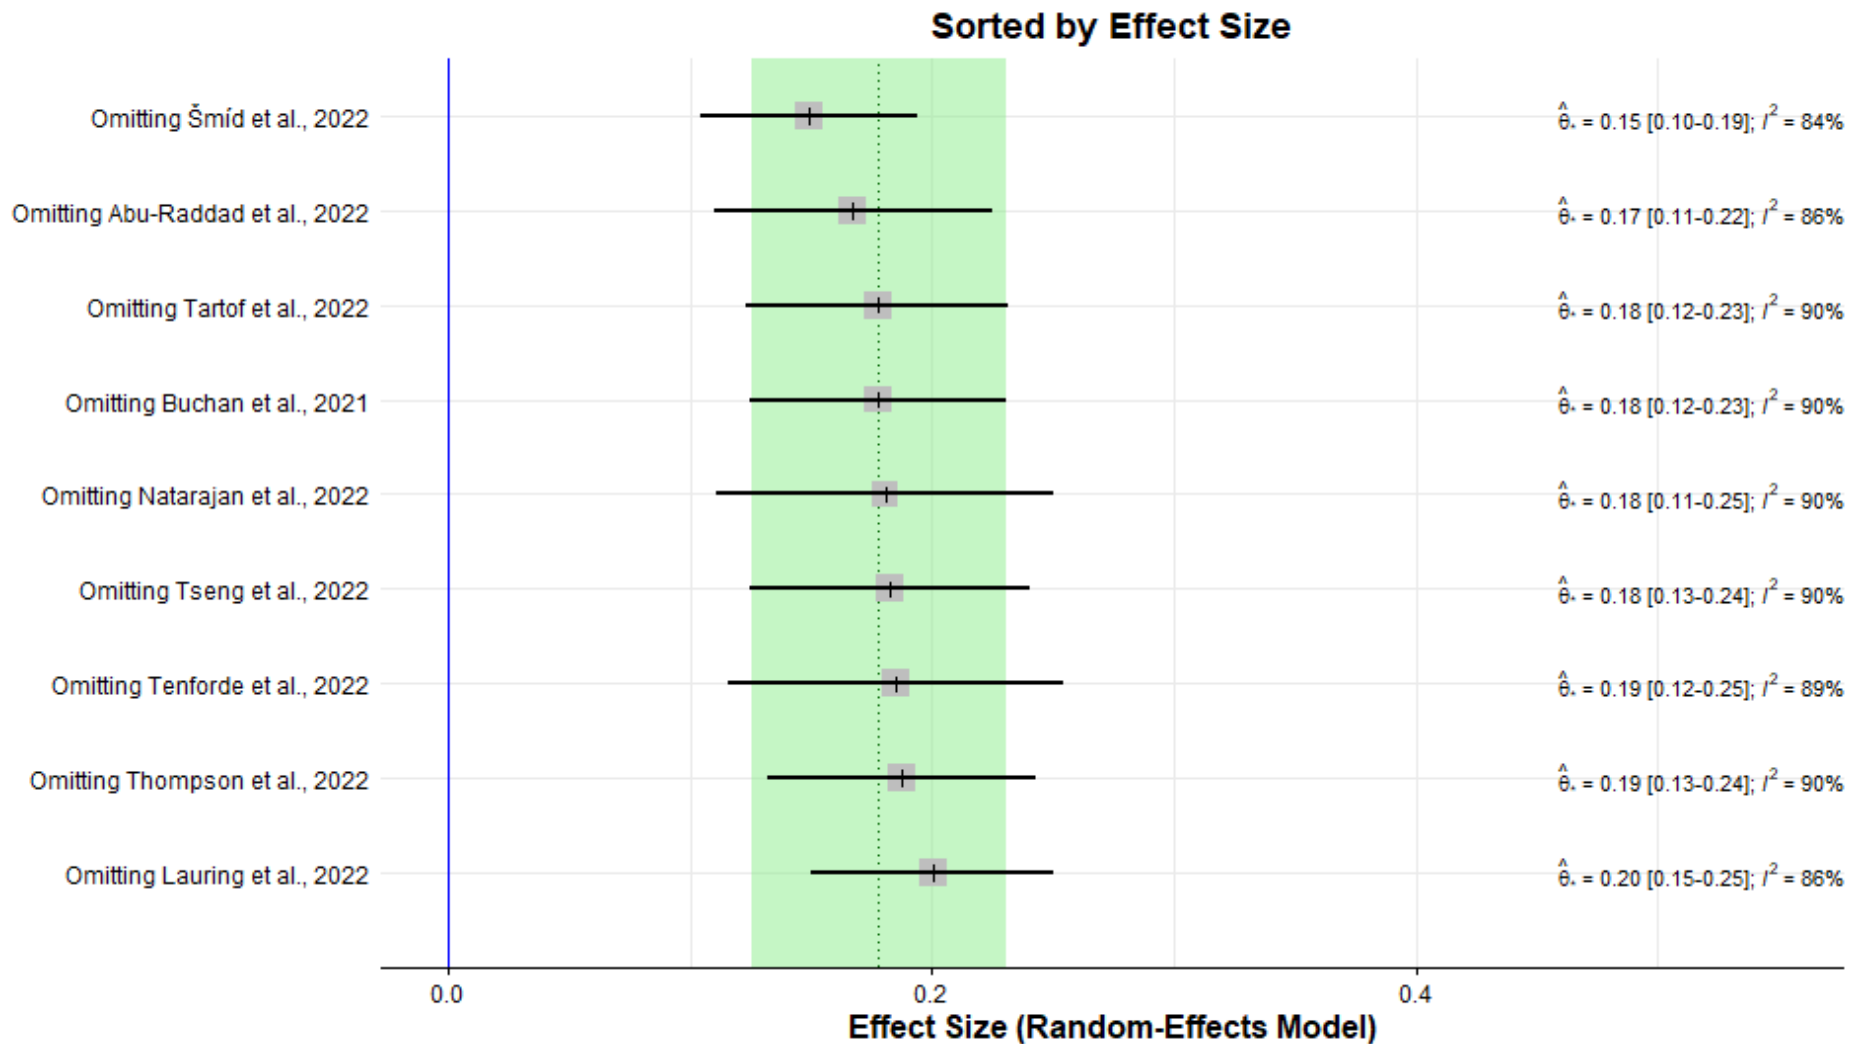

Figure S6. The result of leave-one-out sensitivity analyses for symptomatic infection endpoint in the 'within 3 months or more' model

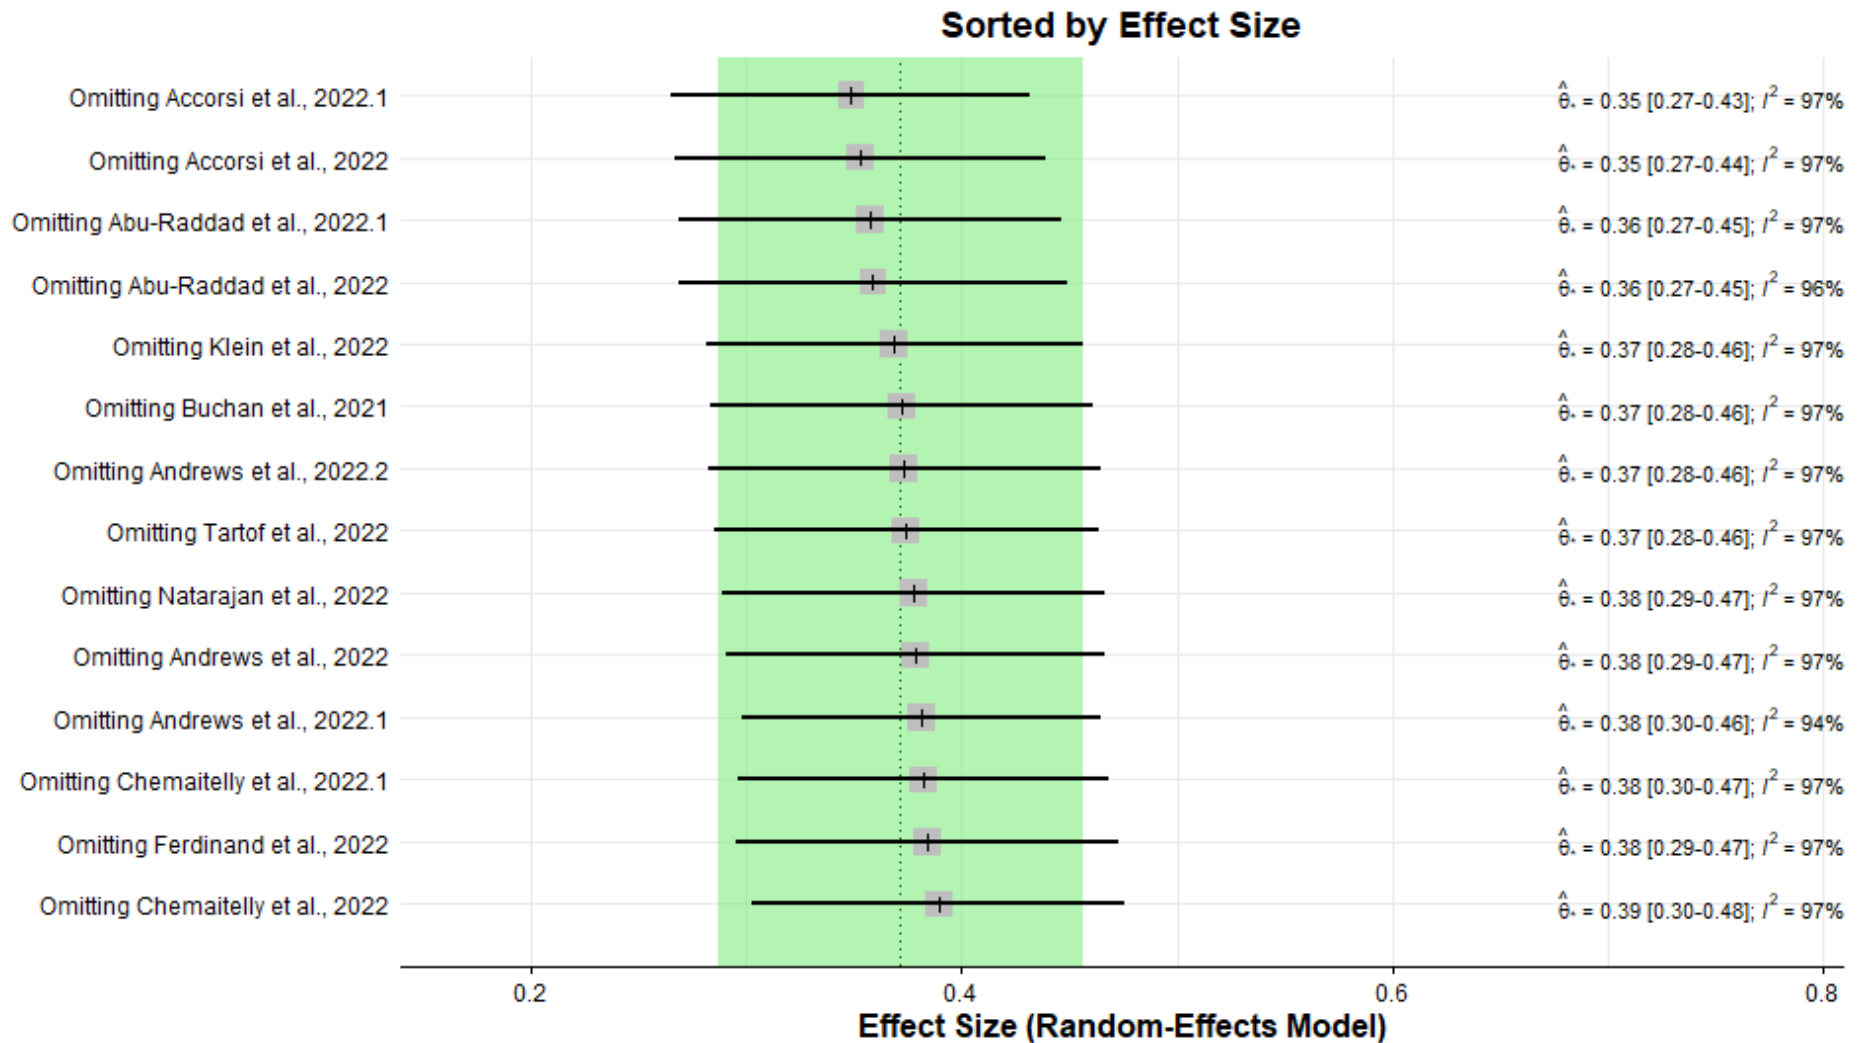

Supplement: Supplementary file [file media-1.pdf]
